# Supplementary material for: Controllable synthesis of disulfides and thiosulfonates from sodium sulfinates mediated by hydroiodic acid using ethanol and H2O as solvents
Source: Royal Society of Chemistry journal article supplement (doi:10.1039/d2ob01778d), 2022-01-01
Supplement: d2ob01778d1.pdf [file d2ob01778d1.pdf]

## Supporting Information

### **Controllable Synthesis of Disulfides and Thiosulfonates from Sodium Sulfates Mediated by Hydroiodic Acid using Ethanol and H<sub>2</sub>O as Solvent Respectively**

Shengnan Sun, Junchen Li, Li Pan, Haibo Liu, Yongbiao Guo, Zhenhua Gao, Xiaojing Bi\*

State Key Laboratory of NBC Protection for Civilian, Beijing 102205, PR China

#### **Table of contents**

|                                                                                 |    |
|---------------------------------------------------------------------------------|----|
| General Information .....                                                       | 1  |
| Experimental Procedure .....                                                    | 1  |
| Analytical Data for the Products .....                                          | 2  |
| Copies of <sup>1</sup> H NMR, <sup>13</sup> C NMR and <sup>19</sup> F NMR ..... | 9  |
| References .....                                                                | 48 |

## 1. General Information

All reactions were performed in sealed tube with magnetic stirring. Unless otherwise stated, all commercially available reagents were used without further purification.  $^1\text{H}$  and  $^{13}\text{C}$  NMR spectra were recorded at ambient temperature on Bruker Advance III HD 600 or Ultrashield<sup>TM</sup> 300 instruments. All spectra were referenced to  $\text{CDCl}_3$  ( $^1\text{H}$  @  $\delta$  7.26 ppm and  $^{13}\text{C}$  NMR @  $\delta$  77.00 ppm). Data were reported as follows: chemical shift, multiplicity (s = singlet, d = doublet, t = triplet, q = quartet, dd = doublet of doublets, td = triplet of doublets, qd = quartet of doublets, m = multiplet), coupling constants (Hz) and integration.

## 2. Experimental Procedure

### (1) Synthesis of symmetric disulfide (2a-2o)

A 10 mL sealed tube was charged with substituted sodium sulfinatate (0.6 mmol), EtOH (4 mL) and HI (55%-57% aqueous solution, 5 eq). The mixture was allowed to stir at room temperature and monitored by TLC until the reaction was complete. Saturated aqueous  $\text{Na}_2\text{SO}_3$  solution was added to the reaction mixture and the aqueous phase was further extracted with DCM (3 $\times$ 10 mL). The combined organic layers were dried over anhydrous  $\text{Na}_2\text{SO}_4$  and concentrated under a vacuum to give the crude product. The residue was purified by column chromatography on silica gel using petroleum and n-hexane as eluent to provide the desired product.

### (2) Synthesis of asymmetric disulfide (3a-3k)

A 10 mL sealed tube was charged with substituted sodium sulfinatate (**1**, 0.3 mmol) and another sodium sulfinatate (**2**, 0.3 mmol), EtOH (4 mL), HI (55%-57% aqueous solution, 5 eq). The mixture was allowed to stir at room temperature and monitored by TLC until the reaction was complete. Saturated aqueous  $\text{Na}_2\text{SO}_3$  solution was added to the reaction mixture and the aqueous phase was further extracted with DCM (3 $\times$ 10 mL). The combined organic layers were dried over anhydrous  $\text{Na}_2\text{SO}_4$  and concentrated under a vacuum to give the crude product. The residue was purified by column chromatography on silica gel using petroleum, acetonitrile, and  $\text{H}_2\text{O}$  as eluent to provide the desired products.

### (3) Synthesis of symmetric thiosulfonate

The general procedure for thiosulfonates (**4a**, **4d-4i**)

A 10 mL sealed tube was charged with substituted sodium sulfinatate (0.6 mmol) in  $\text{H}_2\text{O}$  (4 mL), HI (55%-57% aqueous solution, 5 eq) was added to the mixture. The reaction mixture was allowed to stir at 50 $^\circ\text{C}$  and monitored by TLC until the reaction was complete. The solid crude product is filtered, washed with saturated  $\text{Na}_2\text{SO}_3$ , water, and dried in vacuo to obtain the target compound.

The general procedure for thiosulfonates (**4b-4c**, **4j-4k**)

A 10 mL sealed tube was charged with substituted sodium sulfinatate (0.6 mmol) in  $\text{H}_2\text{O}$  (4 mL), then HI (55%-57% aqueous solution, 5 eq) was added. The mixture was allowed to stir at 50 $^\circ\text{C}$  and monitored by TLC until the reaction was complete. Saturated aqueous  $\text{Na}_2\text{SO}_3$  solution was

added to the mixture and the aqueous phase was further extracted with DCM (3×10 mL). The combined organic layers was dried over anhydrous Na<sub>2</sub>SO<sub>4</sub> and concentrated. The residue was purified by column chromatography on silica gel using petroleum/n-hexane/ethyl acetate as eluent to provide the desired product.

### 3. Analytical Data for the Products

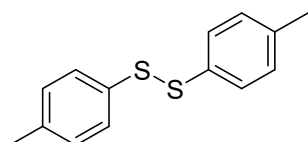

**1,2-Di-*p*-tolyldisulfide (2a)**<sup>[1]</sup>. White solid, 71 mg, yield 95%.

<sup>1</sup>H NMR (600 MHz, CDCl<sub>3</sub>) δ 7.39 (d, *J* = 8.2 Hz, 4H), 7.11 (d, *J* = 8.0 Hz, 4H), 2.33 (s, 6H). <sup>13</sup>C NMR (151 MHz, CDCl<sub>3</sub>) δ 137.58, 134.04, 129.92, 128.68, 21.2.

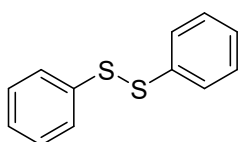

**1,2-Diphenyldisulfide (2b)**<sup>[1]</sup>. Pale yellow solid, 68 mg, yield 92%.

<sup>1</sup>H NMR (600 MHz, CDCl<sub>3</sub>) δ 7.49 (d, *J* = 7.2 Hz, 4H), 7.29 (t, *J* = 7.7 Hz, 4H), 7.24 – 7.20 (q, 2H). <sup>13</sup>C NMR (151 MHz, CDCl<sub>3</sub>) δ 137.17, 129.20, 127.65, 127.29.

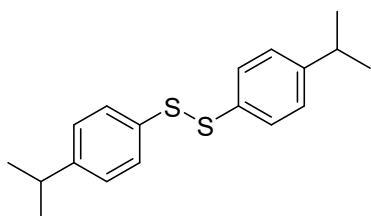

**1,2-bis(4-isopropylphenyl) disulfide (2c)**<sup>[1]</sup>. White solid, 85 mg, yield 94%.

<sup>1</sup>H NMR (600 MHz, CDCl<sub>3</sub>) δ 7.43 (d, *J* = 7.3 Hz, 4H), 7.17 (d, *J* = 7.6 Hz, 4H), 2.88 (h, *J* = 6.9 Hz, 2H), 1.23 (dd, *J* = 6.9, 1.3 Hz, 12H). <sup>13</sup>C NMR (151 MHz, CDCl<sub>3</sub>) δ 148.45, 134.43, 128.38, 127.36, 33.90, 24.05.

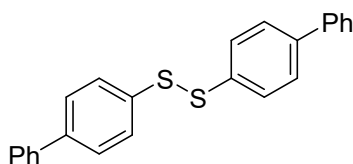

**1,2-Di([1,1'-biphenyl]-4-yl) disulfide (2d)**<sup>[1]</sup>. Pale yellow solid, 58 mg, yield 52%.

<sup>1</sup>H NMR (600 MHz, CDCl<sub>3</sub>) δ 7.60 (d, *J* = 8.4 Hz, 4H), 7.57 – 7.54 (t, 8H), 7.43 (t, *J* = 7.6 Hz, 4H), 7.36 – 7.33 (t, 2H). <sup>13</sup>C NMR (151 MHz, CDCl<sub>3</sub>) δ 140.52, 140.35, 136.18, 129.00, 128.36, 127.95, 127.68, 127.13.

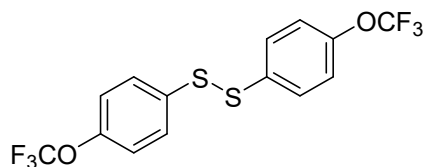

**1,2-Bis(4-(trifluoromethoxy) phenyl) disulfide (2e)**<sup>[1]</sup>. Colourless oil, 94 mg, yield 81%.

<sup>1</sup>H NMR (600 MHz, CDCl<sub>3</sub>) δ 7.53 – 7.49 (m, 4H), 7.18 (d, *J* = 7.9 Hz, 4H). <sup>13</sup>C NMR (151 MHz, CDCl<sub>3</sub>) δ 148.83, 148.82, 135.32, 129.43, 121.87.

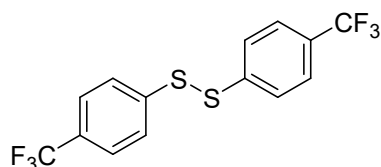

**1,2-Bis(4-(trifluoromethyl) phenyl) disulfide (2f)**<sup>[1]</sup>. Yellow solid, 91 mg, yield 81%.

<sup>1</sup>H NMR (600 MHz, CDCl<sub>3</sub>) δ 7.60 – 7.56 (m, 8H). <sup>13</sup>C NMR (151 MHz, CDCl<sub>3</sub>) δ 140.8, 129.4 (q, *J* = 33.0 Hz), 126.6, 126.1 (q, *J* = 3.7 Hz), 123.9 (q, *J* = 273.0 Hz). <sup>19</sup>F NMR (565 MHz, CDCl<sub>3</sub>) δ -62.60.

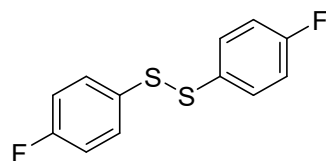

**1,2-bis(4-fluorophenyl) disulfide (2g)**<sup>[1]</sup>. Colourless oil, 71 mg, yield 92%.

<sup>1</sup>H NMR (600 MHz, CDCl<sub>3</sub>) δ 7.47 – 7.43 (m, 4H), 7.03 – 6.99 (m, 4H). <sup>13</sup>C NMR (151 MHz, CDCl<sub>3</sub>) δ 163.56, 161.92, 132.32, 132.30, 131.44, 131.38, 116.49, 116.34. <sup>19</sup>F NMR (565 MHz, CDCl<sub>3</sub>) δ -113.43 (ddd, *J* = 14.0, 8.7, 5.1 Hz).

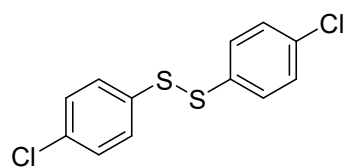

**1,2-Bis(4-chlorophenyl) disulfide (2h)**<sup>[1]</sup>. Pale yellow solid, 62 mg, yield 72%.

<sup>1</sup>H NMR (600 MHz, CDCl<sub>3</sub>) δ 7.39 (d, *J* = 8.7 Hz, 4H), 7.26 (d, *J* = 8.7 Hz, 4H). <sup>13</sup>C NMR (151 MHz, CDCl<sub>3</sub>) δ 135.26, 133.76, 129.45, 129.42.

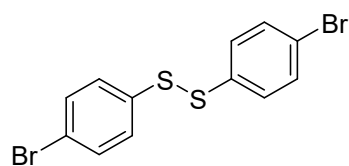

**1,2-Bis(4-bromophenyl) disulfide (2i)**<sup>[1]</sup>. Pale yellow solid, 91 mg, yield 81%.

<sup>1</sup>H NMR (600 MHz, CDCl<sub>3</sub>) δ 7.44 – 7.41 (m, 4H), 7.35 – 7.32 (m, 4H). <sup>13</sup>C NMR (151 MHz, CDCl<sub>3</sub>) δ 135.85, 132.33, 129.50, 121.66.

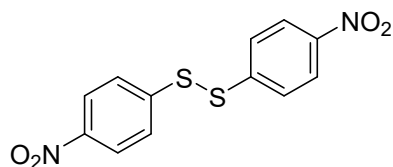

**1,2-Bis (4-nitrophenyl) disulfide (2j)** <sup>[2]</sup>. Yellow solid, 77 mg, yield 83%.

<sup>1</sup>H NMR (600 MHz, CDCl<sub>3</sub>) δ 8.21 – 8.17 (m, 4H), 7.64 – 7.60 (m, 4H). <sup>13</sup>C NMR (151 MHz, CDCl<sub>3</sub>) δ 147.14, 144.20, 126.54, 124.61, 77.37, 76.95.

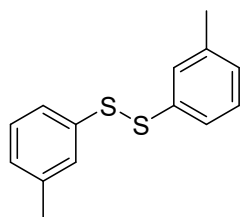

**1,2-di-*m*-tolyldisulfide (2k)** <sup>[2]</sup>. White solid, 65 mg, yield 88%.

<sup>1</sup>H NMR (600 MHz, CDCl<sub>3</sub>) δ 7.29 (d, *J* = 7.1 Hz, 4H), 7.17 (t, *J* = 7.9 Hz, 2H), 7.03 – 6.99 (m, 2H), 2.30 (s, 6H). <sup>13</sup>C NMR (151 MHz, CDCl<sub>3</sub>) δ 139.02, 137.04, 129.01, 128.13, 128.12, 124.68, 21.50.

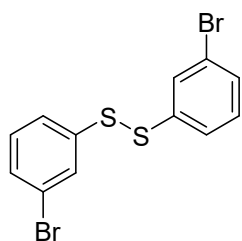

**1,2-Bis(3-bromophenyl) disulfide (2l)** <sup>[2]</sup>. Colourless oil, 81 mg, yield 72%.

<sup>1</sup>H NMR (600 MHz, CDCl<sub>3</sub>) δ 7.63 (t, *J* = 1.8 Hz, 2H), 7.40 (ddd, *J* = 7.9, 1.9, 0.9 Hz, 2H), 7.37 (ddd, *J* = 8.0, 1.9, 1.0 Hz, 2H), 7.18 (t, *J* = 7.9 Hz, 2H). <sup>13</sup>C NMR (151 MHz, CDCl<sub>3</sub>) δ 138.76, 130.61, 130.05, 126.01, 123.26.

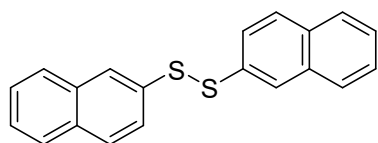

**1,2-Di(naphthalen-2-yl) disulfide (2m)** <sup>[2]</sup>. White solid, 78 mg, yield 82%.

<sup>1</sup>H NMR (300 MHz, CDCl<sub>3</sub>) δ 7.99 (d, *J* = 1.6 Hz, 2H), 7.82 – 7.71 (m, 6H), 7.62 (dd, *J* = 8.7, 1.9 Hz, 2H), 7.50 – 7.42 (m, 4H). <sup>13</sup>C NMR (75 MHz, CDCl<sub>3</sub>) δ 134.35, 133.57, 132.59, 129.11, 127.90, 127.59, 126.87, 126.60, 126.36, 125.74.

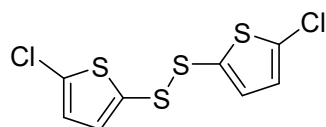

**1,2-Bis(5-chlorothiophen-2-yl) disulfide (2n)** <sup>[2]</sup>. Yellow oil, 67 mg, yield 75%.

<sup>1</sup>H NMR (600 MHz, CDCl<sub>3</sub>) δ 6.97 (d, *J* = 3.9 Hz, 2H), 6.84 (s, 2H). <sup>13</sup>C NMR (151 MHz, CDCl<sub>3</sub>) δ 136.02, 135.87, 134.01, 127.28.

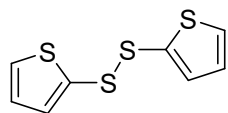

**1,2-Di(thiophen-2-yl) disulfide (2o)** <sup>[2]</sup>. Yellow solid, 65 mg, yield 93%.

<sup>1</sup>H NMR (300 MHz, CDCl<sub>3</sub>) δ 7.50 (dd, *J* = 5.3, 1.3 Hz, 2H), 7.15 (dd, *J* = 3.6, 1.2 Hz, 2H), 7.01 (q, *J* = 5.3, 3.6 Hz, 2H). <sup>13</sup>C NMR (75 MHz, CDCl<sub>3</sub>) δ 135.73, 135.68, 132.36, 127.80.

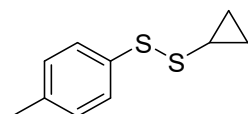

**1-cyclopropyl-2-(p-tolyl) disulfide (2p)** <sup>[3]</sup>. White solid. 34 mg, yield 57%.

<sup>1</sup>H NMR (300 MHz, CDCl<sub>3</sub>) δ 7.47 (d, *J* = 8.2 Hz, 2H), 7.17 – 7.11 (d, 2H), 2.35 (s, 3H), 2.33 – 2.26 (m, 1H), 0.97 – 0.71 (m, 4H). <sup>13</sup>C NMR (75 MHz, CDCl<sub>3</sub>) δ 137.38, 134.44, 129.83, 129.31, 21.21, 19.32, 9.67.

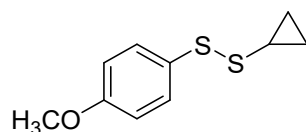

**1-cyclopropyl-2-(4-methoxyphenyl) disulfide (2q)** <sup>[3]</sup>. White solid. 38 mg, yield 60%.

<sup>1</sup>H NMR (300 MHz, CDCl<sub>3</sub>) δ 7.52 (d, *J* = 8.7 Hz, 2H), 6.86 (d, *J* = 8.8 Hz, 2H), 3.81 (s, 3H), 2.29 (tt, *J* = 7.6, 4.3 Hz, 1H), 0.97 – 0.68 (m, 4H). <sup>13</sup>C NMR (75 MHz, CDCl<sub>3</sub>) δ 159.82, 132.68, 128.71, 114.71, 55.53, 19.25, 9.55.

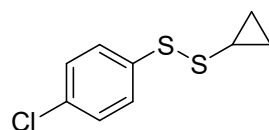

**1-(4-chlorophenyl)-2-cyclopropyl disulfide (2r)** <sup>[3]</sup>. White solid. 34 mg, yield 53%.

<sup>1</sup>H NMR (300 MHz, CDCl<sub>3</sub>) δ 7.50 (dd, *J* = 8.4, 1.4 Hz, 2H), 7.35 – 7.27 (dd, 2H), 2.33 – 2.25 (m, 1H), 0.97 – 0.73 (m, 4H). <sup>13</sup>C NMR (75 MHz, CDCl<sub>3</sub>) δ 136.54, 133.09, 129.75, 129.19, 19.30, 9.78.

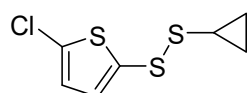

**2-chloro-5-(cyclopropylidysulfaneyl) thiophene (2s)** <sup>[3]</sup>. Colourless oil, 32 mg, yield 47%.

<sup>1</sup>H NMR (600 MHz, CDCl<sub>3</sub>) δ 7.50 (d, *J* = 8.6 Hz, 2H), 7.29 (d, *J* = 8.5 Hz, 2H), 2.28 (tt, *J* = 7.4, 4.3 Hz, 1H), 0.96 – 0.93 (m, 2H), 0.75 – 0.72 (m, 2H). <sup>13</sup>C NMR (151 MHz, CDCl<sub>3</sub>) δ 136.52, 133.06, 129.72, 129.17, 19.29, 9.78.

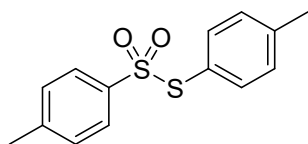

**S-(p-tolyl) 4-methylbenzenesulfonothioate (3a)** <sup>[4]</sup>. White solid, 79 mg, yield 95%.

<sup>1</sup>H NMR (300 MHz, CDCl<sub>3</sub>) δ 7.45 (d, *J* = 8.3 Hz, 2H), 7.22 (t, *J* = 7.4 Hz, 4H), 7.14 (d, *J* = 8.0 Hz, 2H), 2.42 (s, 3H), 2.38 (s, 3H). <sup>13</sup>C NMR (151 MHz, CDCl<sub>3</sub>) δ 144.70, 142.16, 140.59, 136.61, 130.32, 129.48, 127.72, 124.72, 21.79, 21.61.

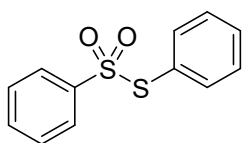

**S-phenyl benzenesulfonothioate (3b)** <sup>[4]</sup>. Colorless oil, 61 mg, yield 81%.

<sup>1</sup>H NMR (600 MHz, CDCl<sub>3</sub>) δ 7.57 (dd, *J* = 11.1, 7.4 Hz, 3H), 7.47 (t, *J* = 7.0 Hz, 1H), 7.43 – 7.40 (m, 2H), 7.36 – 7.31 (m, 4H). <sup>13</sup>C NMR (151 MHz, CDCl<sub>3</sub>) δ 143.07, 136.71, 133.76, 131.54, 129.56, 128.93, 127.96, 127.68.

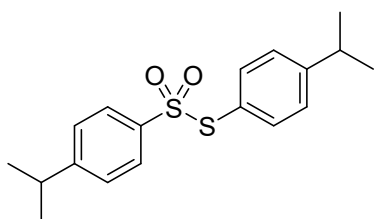

**S-4-(Isopropyl) phenyl-4-isopropylbenzenesulfonothioate (3c)** <sup>[4]</sup>. Colourless oil. 62 mg, yield 62%.

<sup>1</sup>H NMR (600 MHz, CDCl<sub>3</sub>) δ 7.48 (d, *J* = 8.4 Hz, 2H), 7.28 – 7.26 (m, 2H), 7.24 (d, *J* = 8.4 Hz, 2H), 7.18 (d, *J* = 8.2 Hz, 2H), 2.99 – 2.89 (m, 2H), 1.25 (dd, *J* = 10.1, 6.9 Hz, 12H). <sup>13</sup>C NMR (151 MHz, CDCl<sub>3</sub>) δ 155.40, 152.91, 140.74, 136.79, 127.90, 127.69, 126.91, 125.0, 34.39, 34.18, 23.91, 23.77.

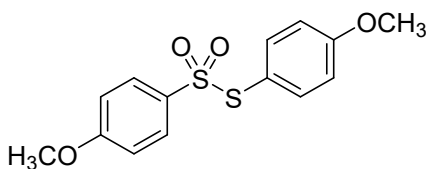

**S-(4-methoxyphenyl)4-methoxybenzenesulfonothioate (3d)** <sup>[4]</sup>. White solid, 86 mg, yield 92%.

<sup>1</sup>H NMR (600 MHz, CDCl<sub>3</sub>) δ 7.50 (d, *J* = 5.5 Hz, 2H), 7.29 – 7.25 (m, 2H), 6.92 – 6.81 (m, 4H), 3.85 (d, *J* = 21.6 Hz, 6H). <sup>13</sup>C NMR (151 MHz, CDCl<sub>3</sub>) δ 163.66, 162.34, 138.51, 135.12, 130.05, 119.10, 115.05, 113.97, 55.84, 55.61.

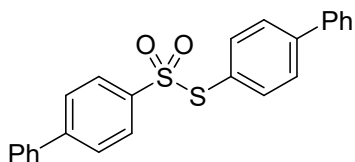

**S-([1,1'-biphenyl]-4-yl)-[1,1'-biphenyl]-4-sulfonylthioate (3e)** <sup>[5]</sup>. White solid, 97 mg, yield 81%.

<sup>1</sup>H NMR (300 MHz, CDCl<sub>3</sub>) δ 7.67 – 7.57 (m, 9H), 7.52 – 7.31 (m, 9H). <sup>13</sup>C NMR (75 MHz, CDCl<sub>3</sub>) δ 146.60, 144.40, 141.80, 139.51, 139.00, 137.15, 129.24, 129.14, 128.90, 128.45, 128.25, 128.18, 127.49, 127.47, 127.33, 126.62.

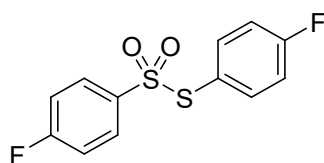

**S-(4-fluorophenyl) 4-fluorobenzenesulfonylthioate(3f)** <sup>[5]</sup>. White solid, 79 mg, yield 92%.

<sup>1</sup>H NMR (600 MHz, CDCl<sub>3</sub>) δ 7.59 (dd, *J* = 8.8, 5.0 Hz, 2H), 7.37 (d, *J* = 8.7 Hz, 2H), 7.12 (t, *J* = 8.5 Hz, 2H), 7.06 (t, *J* = 8.5 Hz, 2H). <sup>13</sup>C NMR (151 MHz, CDCl<sub>3</sub>) δ 166.61, 165.87, 164.90, 164.19, 139.01, 138.95, 130.63, 130.57, 117.16, 117.02, 116.43, 116.28, 5. <sup>19</sup>F NMR (565 MHz, CDCl<sub>3</sub>) δ -102.49, -106.82.

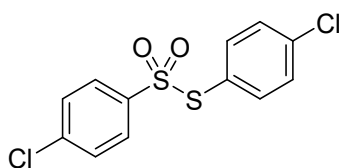

**S-(4-chlorophenyl) 4-chlorobenzenesulfonylthioate (3g)** <sup>[5]</sup>. White solid, 86 mg, yield 90%.

<sup>1</sup>H NMR (600 MHz, CDCl<sub>3</sub>) δ 7.52 (d, *J* = 8.4 Hz, 2H), 7.43 (d, *J* = 8.1 Hz, 2H), 7.38 – 7.29 (m, 4H). <sup>13</sup>C NMR (151 MHz, CDCl<sub>3</sub>) δ 141.46, 140.72, 138.72, 137.84, 130.07, 129.42, 129.09, 126.18.

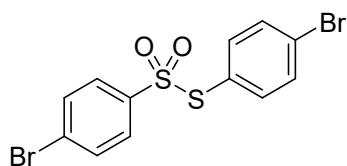

**S-(4-bromophenyl) 4-bromobenzenesulfonylthioate (3h)** <sup>[5]</sup>. White solid, 107 mg, yield 88%.

<sup>1</sup>H NMR (600 MHz, CDCl<sub>3</sub>) δ 7.60 (d, *J* = 8.6 Hz, 2H), 7.52 (d, *J* = 8.5 Hz, 2H), 7.44 (d, *J* = 8.8 Hz, 2H), 7.26 (d, *J* = 5.3 Hz, 2H). <sup>13</sup>C NMR (151 MHz, CDCl<sub>3</sub>) δ 142.03, 137.99, 133.08, 132.44, 129.35, 129.10, 127.18, 126.76.



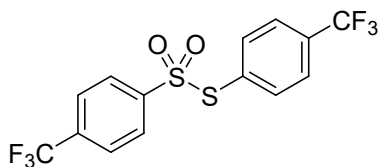

**S-(4-(trifluoromethyl) phenyl) 4-(trifluoromethyl) benzenesulfonylthioate (3i)** <sup>[5]</sup>. White solid, 106 mg, yield 92%.

<sup>1</sup>H NMR (600 MHz, CDCl<sub>3</sub>) δ 7.73 (s, 4H), 7.65 (d, *J* = 8.0 Hz, 2H), 7.54 (d, *J* = 7.9 Hz, 2H). <sup>13</sup>C NMR (151 MHz, CDCl<sub>3</sub>) δ: 122.9 (q, *J* = 272 Hz), 123.3 (q, *J* = 272 Hz), 126.3 (q, *J* = 4 Hz), 126.5 (q, *J* = 4 Hz), 127.9, 131.6, 133.6 (q, *J* = 33 Hz), 135.5 (q, *J* = 33 Hz), 136.7, 146.1. <sup>19</sup>F NMR (565 MHz, CDCl<sub>3</sub>) δ -63.11, -63.21.

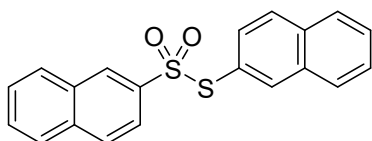

**S-(naphthalen-2-yl) naphthalene-2-sulfonylthioate (3j)** <sup>[5]</sup>. White solid, 63 mg, yield 60%.

<sup>1</sup>H NMR (600 MHz, CDCl<sub>3</sub>) δ 7.94 (s, 1H), 7.89 (dd, *J* = 8.4, 5.0 Hz, 2H), 7.85 – 7.82 (m, 2H), 7.74 (d, *J* = 8.5 Hz, 1H), 7.69 – 7.62 (m, 4H), 7.59 – 7.52 (m, 2H), 7.50 – 7.47 (m, 1H), 7.35 (dd, *J* = 8.5, 1.8 Hz, 1H). <sup>13</sup>C NMR (151 MHz, CDCl<sub>3</sub>) δ 139.84, 137.85, 135.27, 134.26, 133.41, 132.00, 131.77, 129.62, 129.51, 129.48, 129.45, 129.26, 128.55, 128.37, 128.02, 127.87, 127.80, 127.04, 125.33, 122.58.

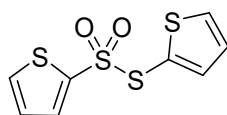

**S-(Thiophen-2-yl) thiophene-2-sulfonylthioate (3k)** <sup>[5]</sup>. Yellow oil, 61 mg, yield 78%.

<sup>1</sup>H NMR (300 MHz, CDCl<sub>3</sub>) δ 7.26 (d, *J* = 4.2 Hz, 2H), 7.10 (d, *J* = 4.0 Hz, 2H), 6.96 (dd, *J* = 9.1, 4.1 Hz, 4H). <sup>13</sup>C NMR (75 MHz, CDCl<sub>3</sub>) δ 140.75, 140.12, 139.81, 139.70, 134.31, 128.20, 127.00, 123.29.

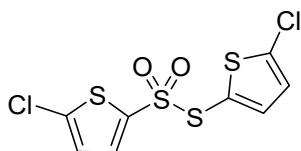

**S-(5-Chlorothiophen-2-yl)5-chlorothiophene-2-sulfonylthioate (3l)** <sup>[5]</sup>. Yellow oil, 71 mg, yield 72%.

<sup>1</sup>H NMR (600 MHz, CDCl<sub>3</sub>) δ 7.27 (s, 1H), 7.10 (d, *J* = 4.0 Hz, 1H), 6.97 (d, *J* = 4.0 Hz, 1H), 6.94 (d, *J* = 4.1 Hz, 1H). <sup>13</sup>C NMR (151 MHz, CDCl<sub>3</sub>) δ 140.79, 140.31, 139.82, 139.75, 134.30, 128.21, 127.00, 123.43.

# Copies of $^1\text{H}$ NMR, $^{13}\text{C}$ NMR and $^{19}\text{F}$ NMR spectra

$^1\text{H}$  NMR of 1,2-Di-*p*-tolylsulfane (**2a**)<sup>[1]</sup>

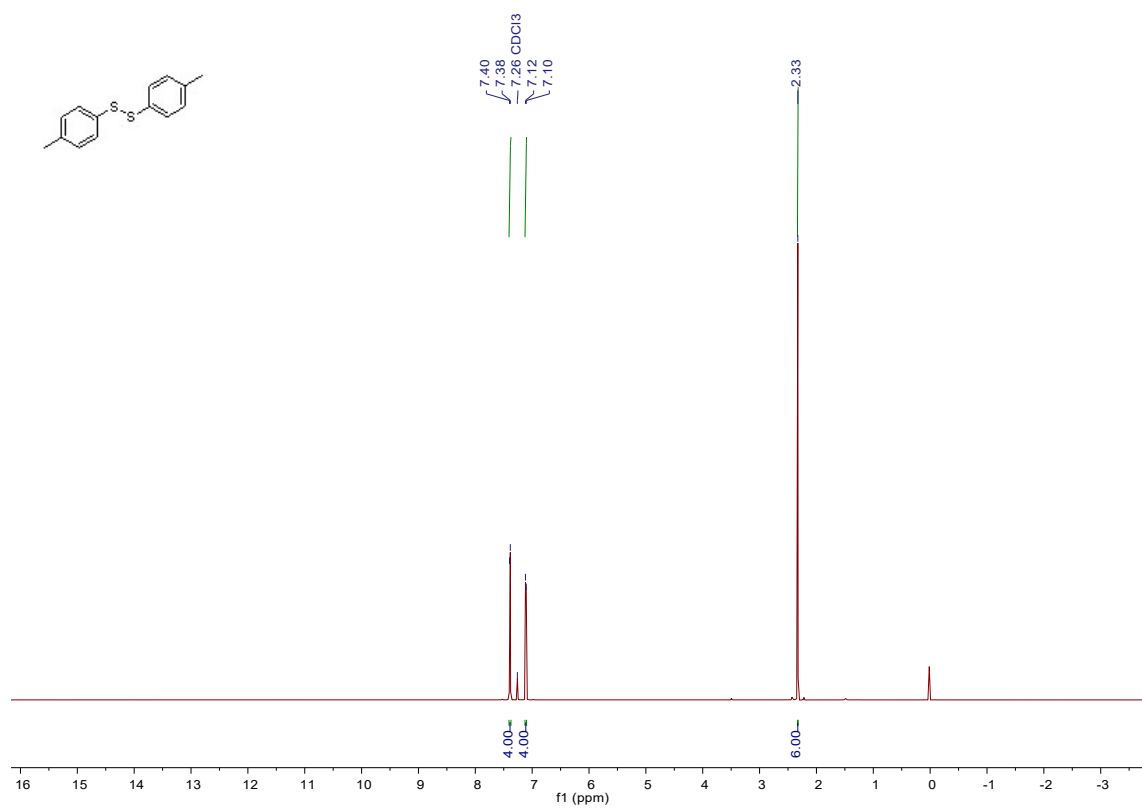

$^{13}\text{C}$  NMR of 1,2-Di-*p*-tolylsulfane (**2a**)<sup>[1]</sup>

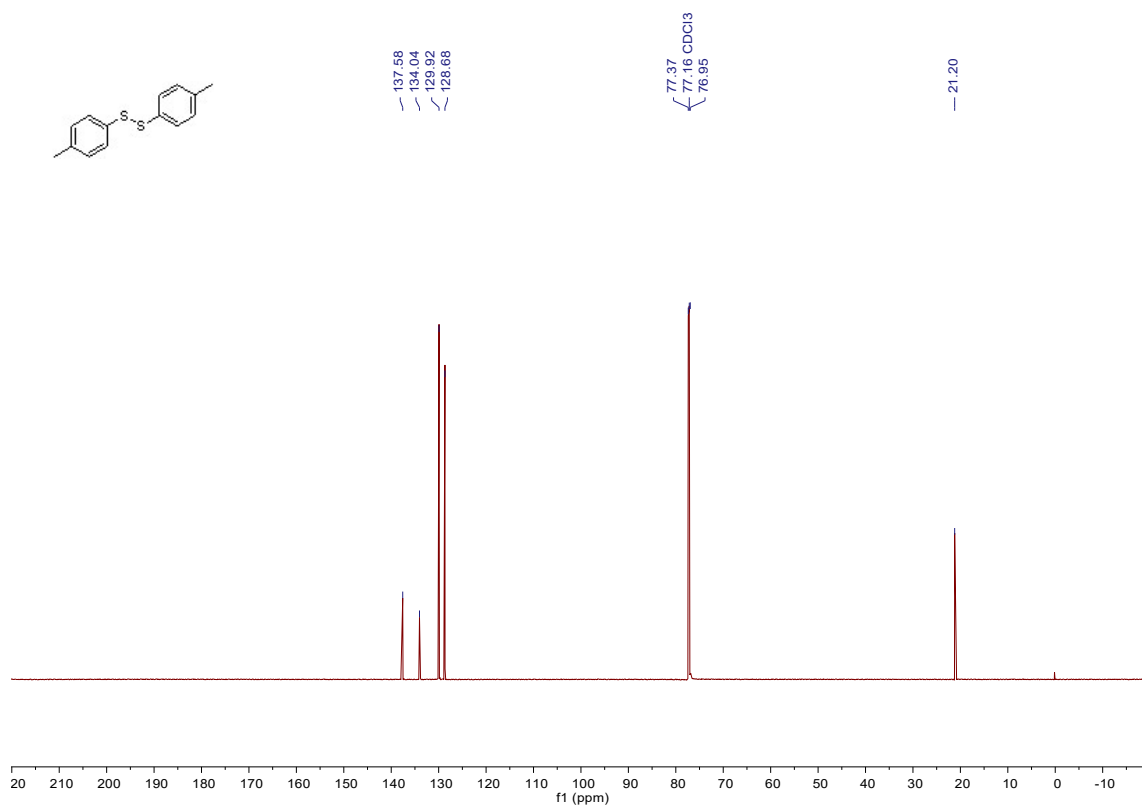

$^1\text{H}$  NMR of 1,2-Diphenyldisulfide (**2b**)<sup>[1]</sup>

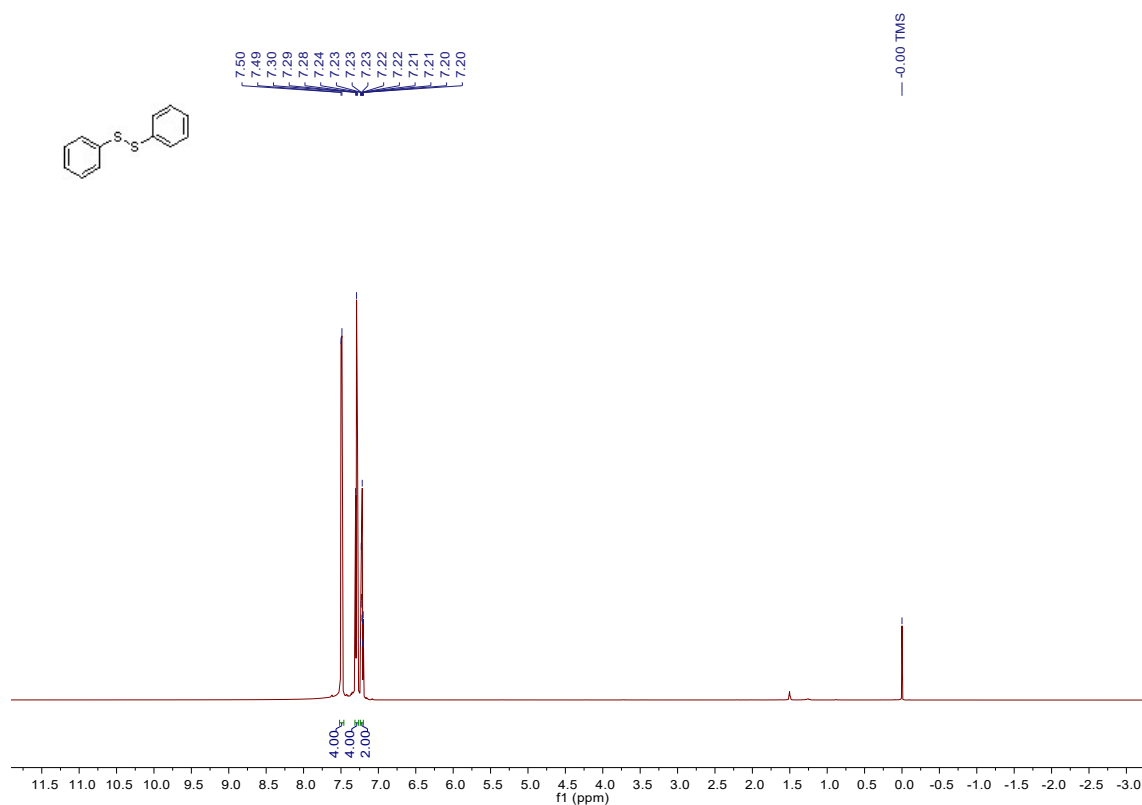

$^{13}\text{C}$  NMR of 1,2-Diphenyldisulfide (**2b**)<sup>[1]</sup>

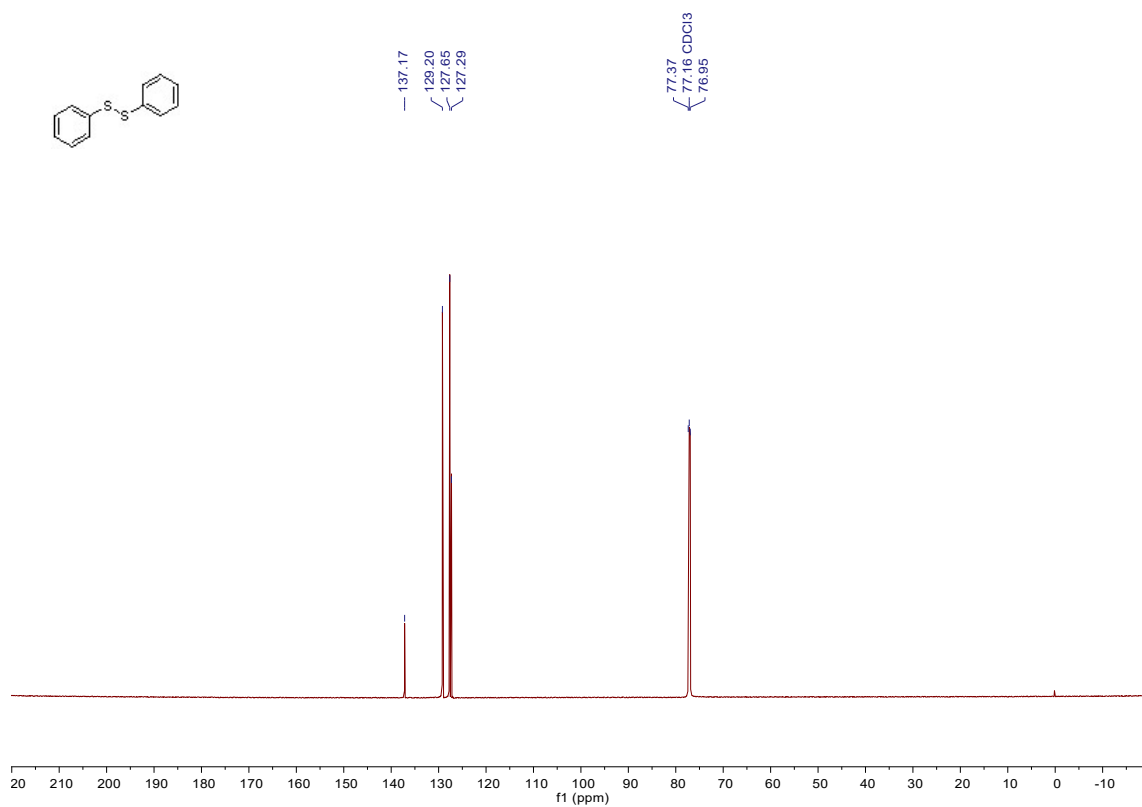

$^1\text{H}$  NMR of 1,2-Bis(4-isopropylphenyl) disulfide (**2c**) [1]

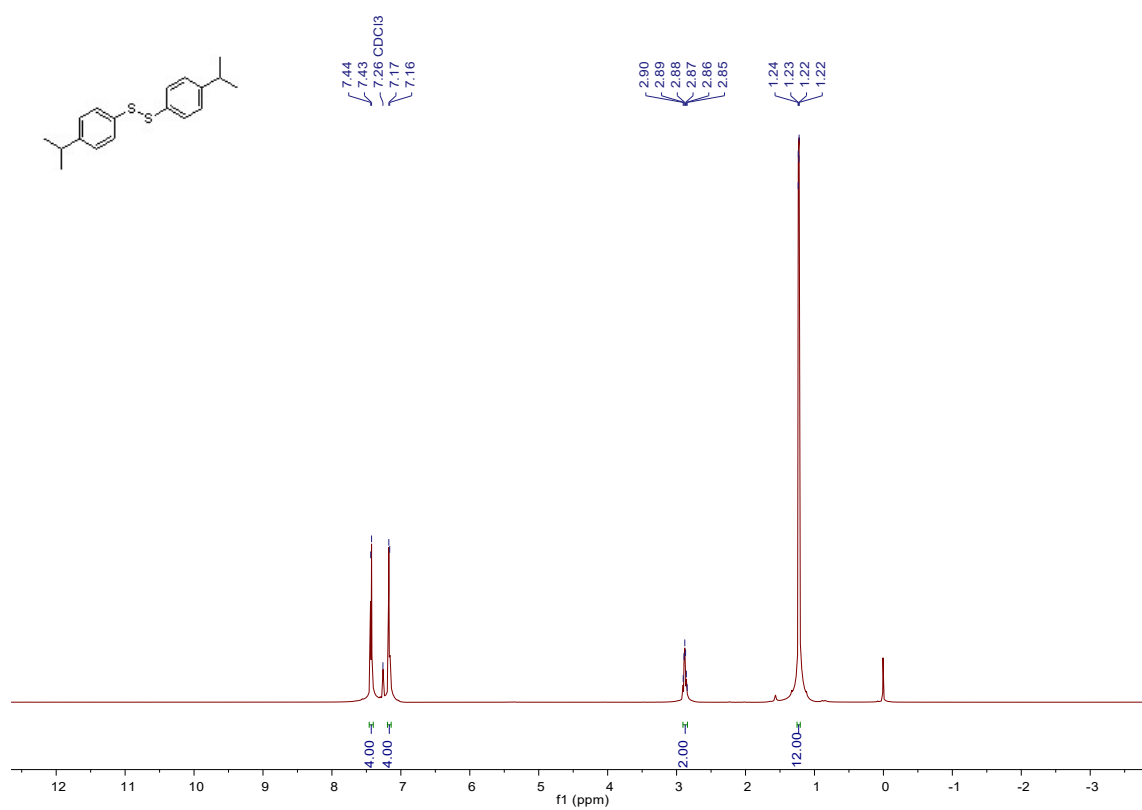

$^{13}\text{C}$  NMR of 1,2-Bis(4-isopropylphenyl) disulfide (**2c**) [1]

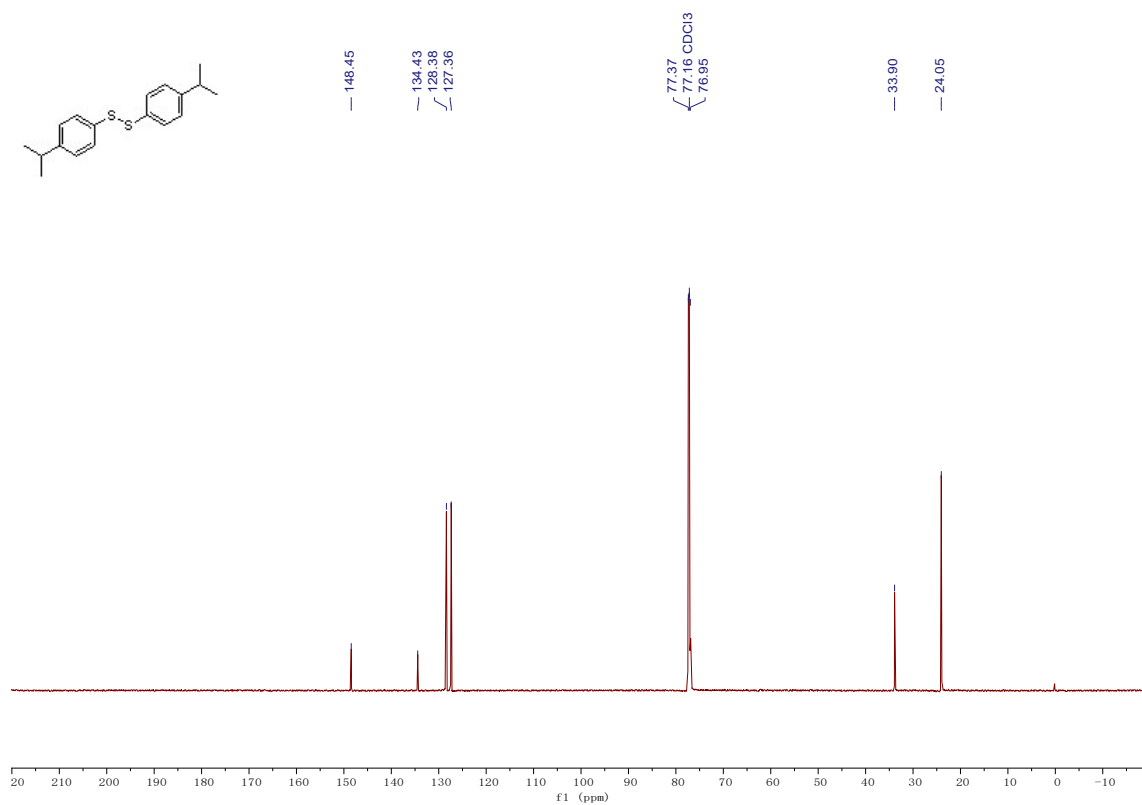

$^1\text{H}$  NMR of 1,2-Di([1,1'-biphenyl]-4-yl) disulfide (**2d**)<sup>[1]</sup>

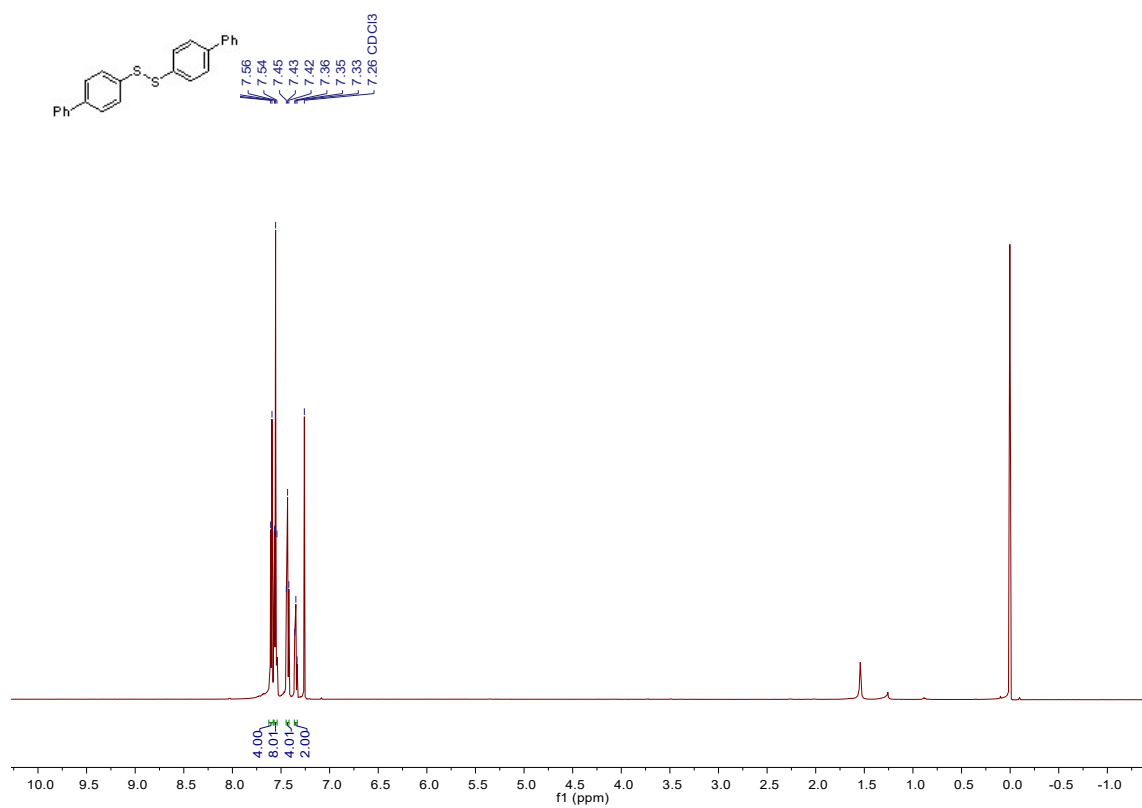

$^{13}\text{C}$  NMR of 1,2-Di([1,1'-biphenyl]-4-yl) disulfide (**2d**)<sup>[1]</sup>

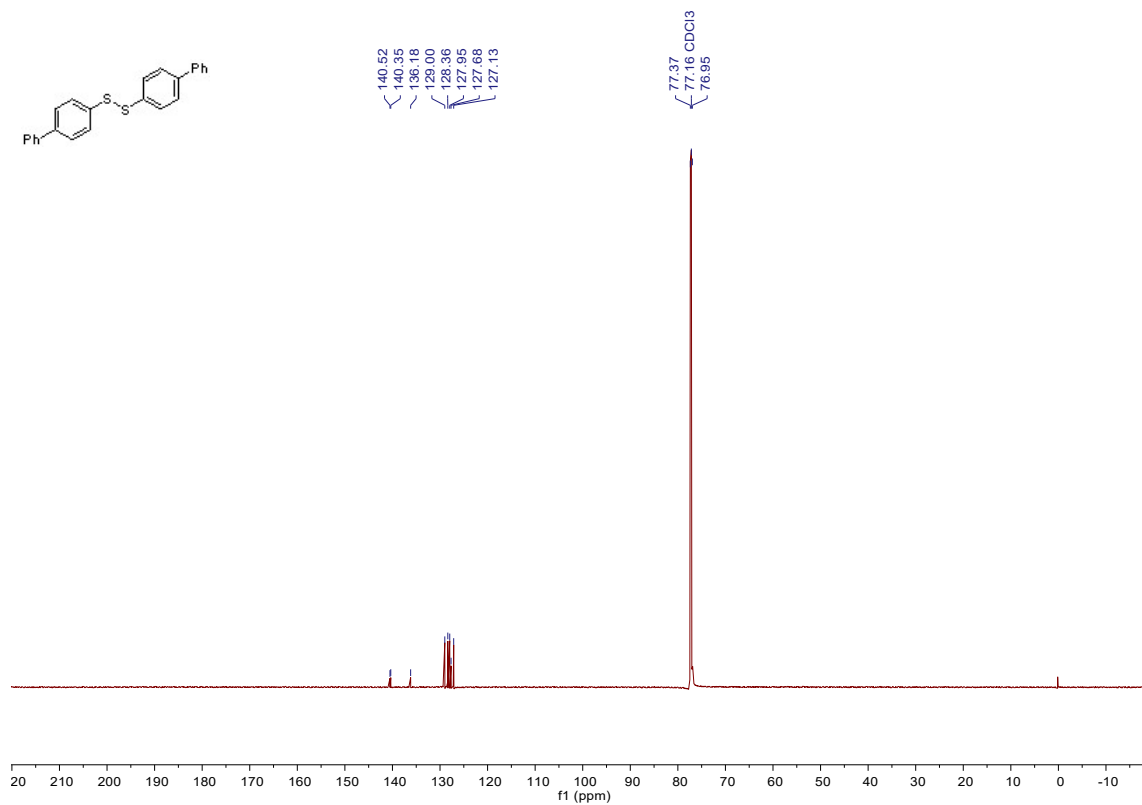

$^1\text{H}$  NMR of 1,2-Bis(4-(trifluoromethoxy) phenyl) disulfide (**2e**) <sup>[1]</sup>

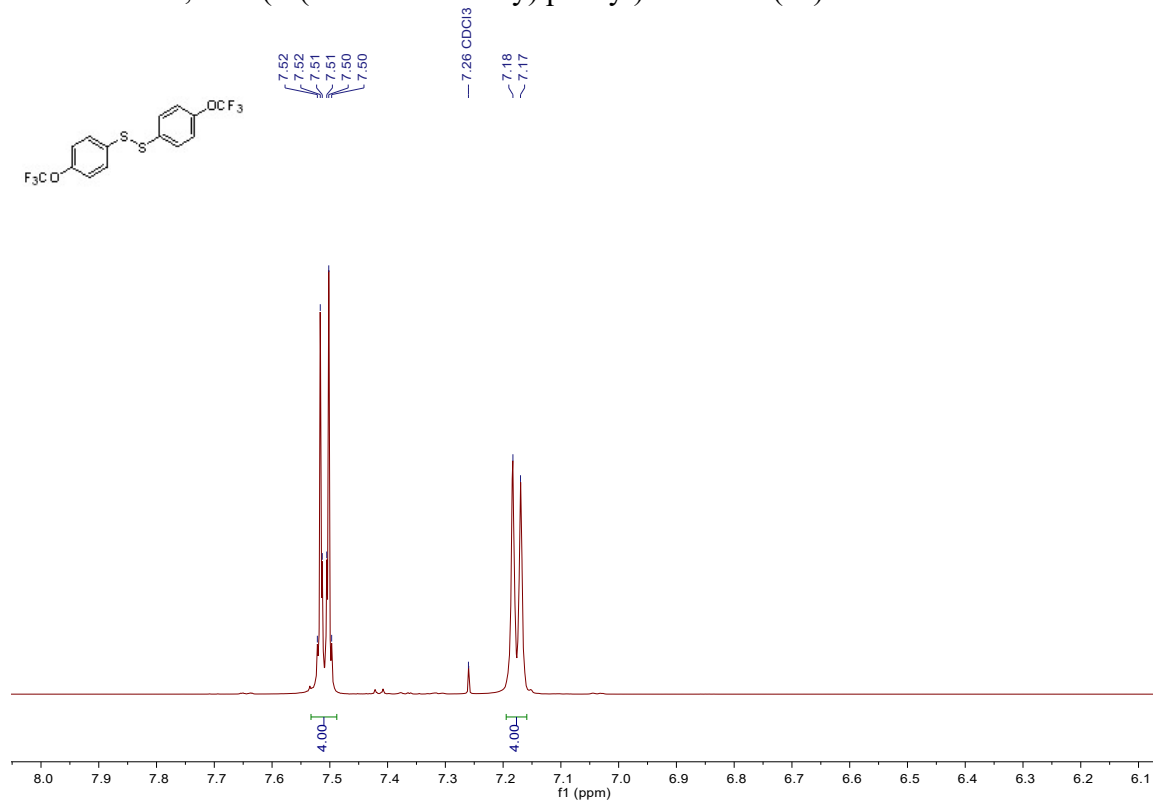

$^{13}\text{C}$  NMR of 1,2-Bis(4-(trifluoromethoxy) phenyl) disulfide (**2e**) <sup>[1]</sup>

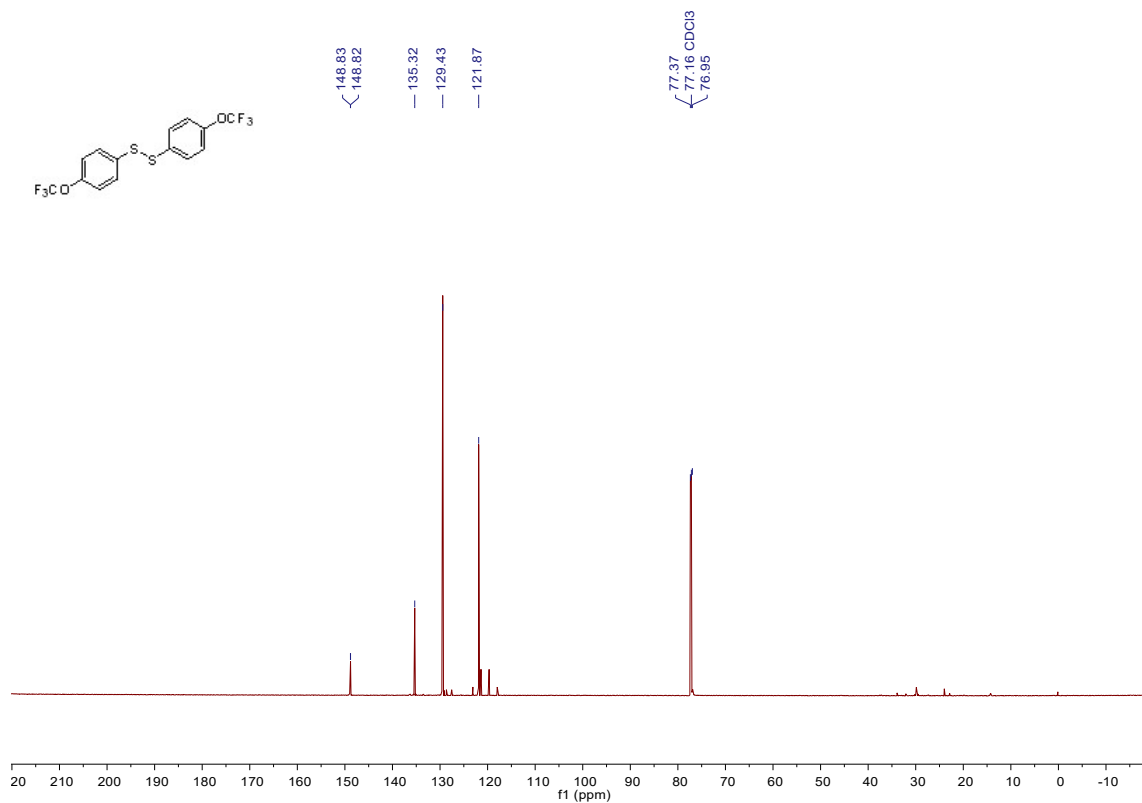

$^1\text{H}$  NMR of 1,2-Bis(4-(trifluoromethyl)phenyl) disulfide (**2f**) [1]

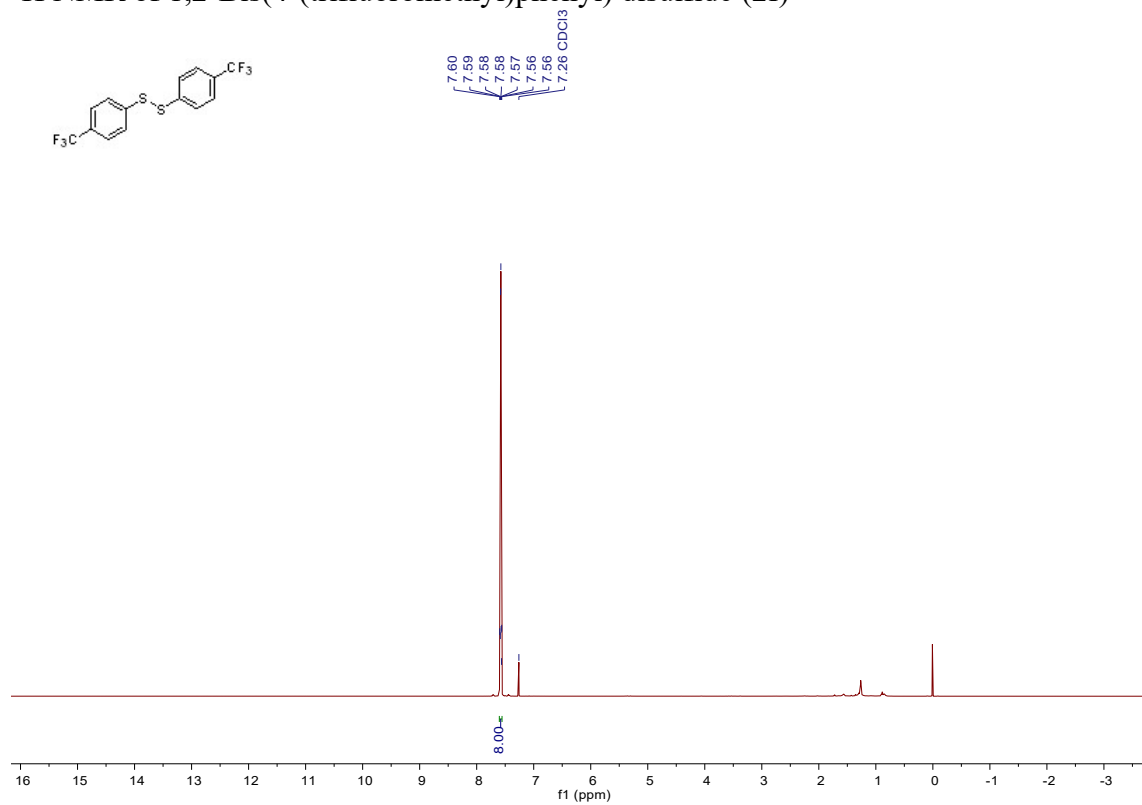

$^{13}\text{C}$  NMR of 1,2-Bis(4-(trifluoromethyl) phenyl) disulfide (**2f**) [1]

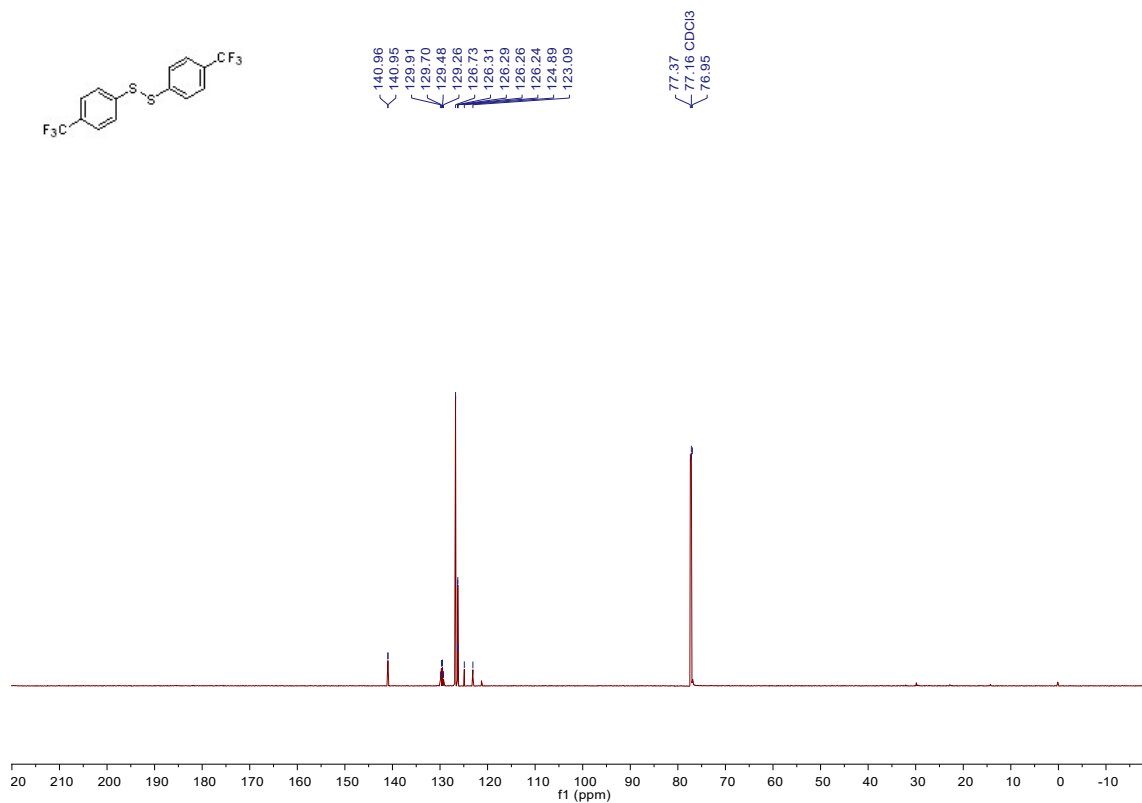

$^{19}\text{F}$  NMR of 1,2-Bis(4-(trifluoromethyl) phenyl) disulfide (**2f**)<sup>[1]</sup>

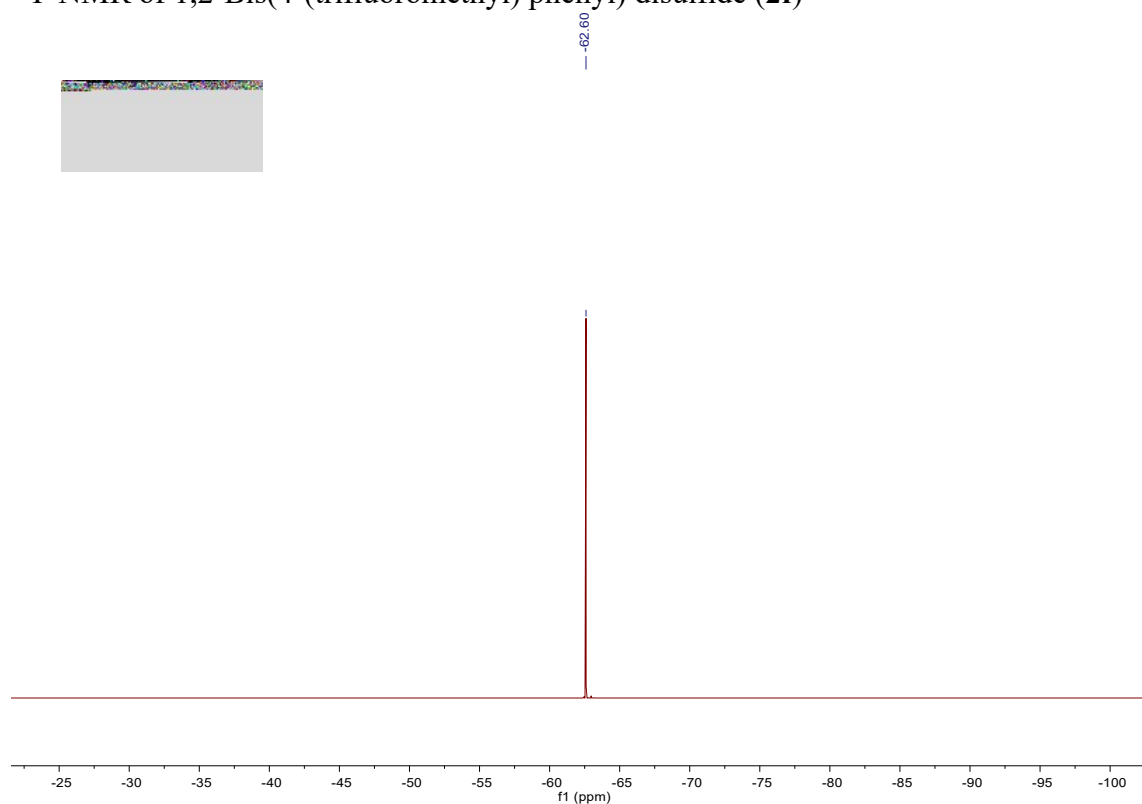

$^1\text{H}$  NMR of 1,2-bis(4-fluorophenyl) disulfide (**2g**)<sup>[1]</sup>

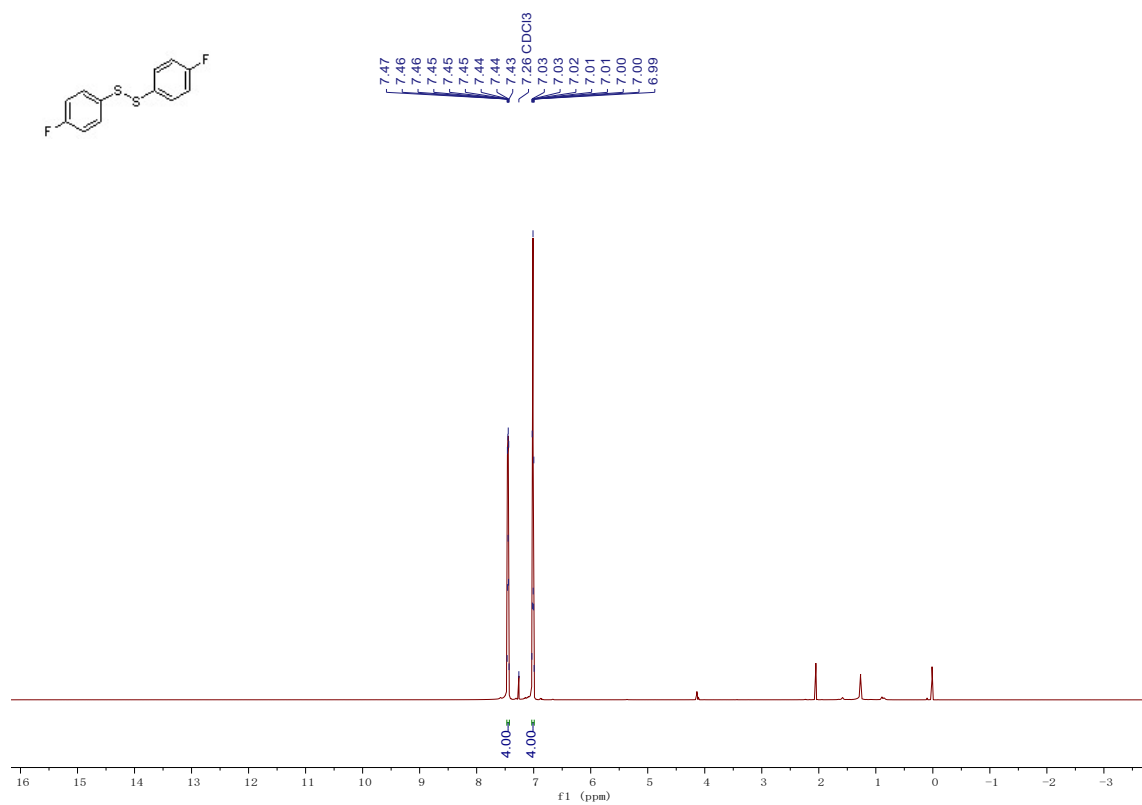



$^{13}\text{C}$  NMR of 1,2-bis(4-fluorophenyl) disulfide (**2g**)<sup>[1]</sup>

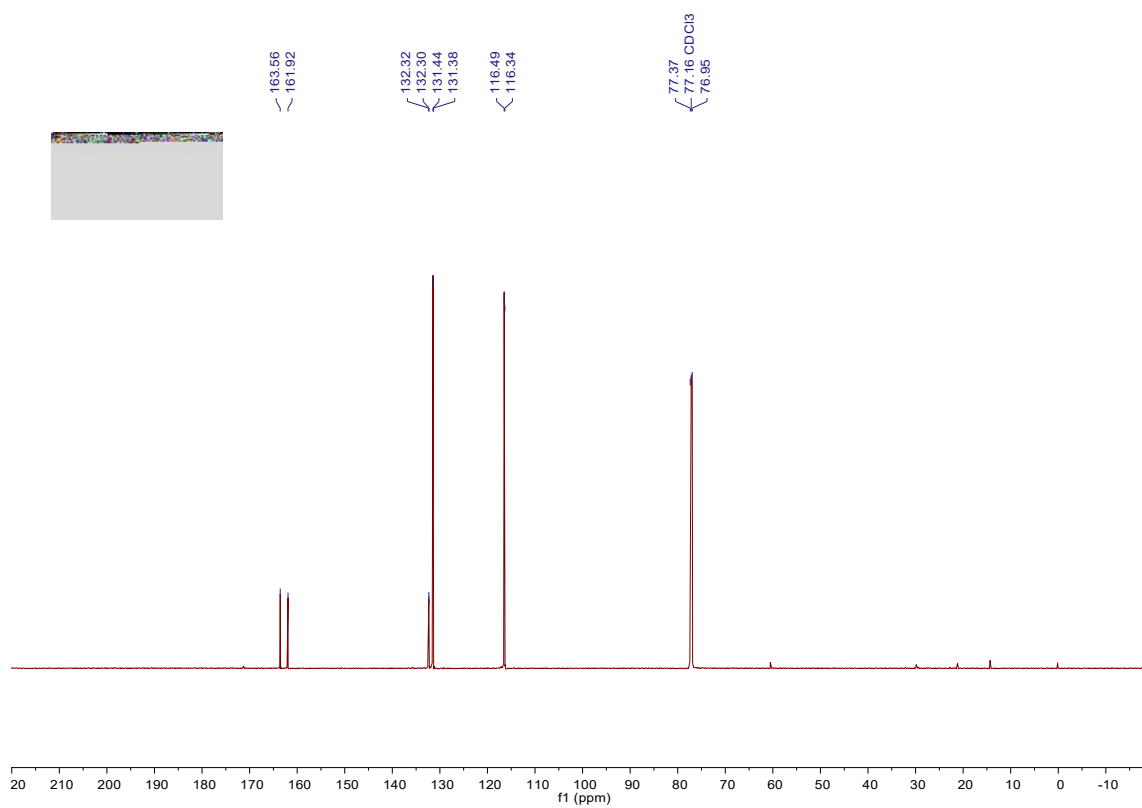

$^{19}\text{F}$  NMR of 1,2-bis(4-fluorophenyl) disulfide (**2g**)<sup>[1]</sup>

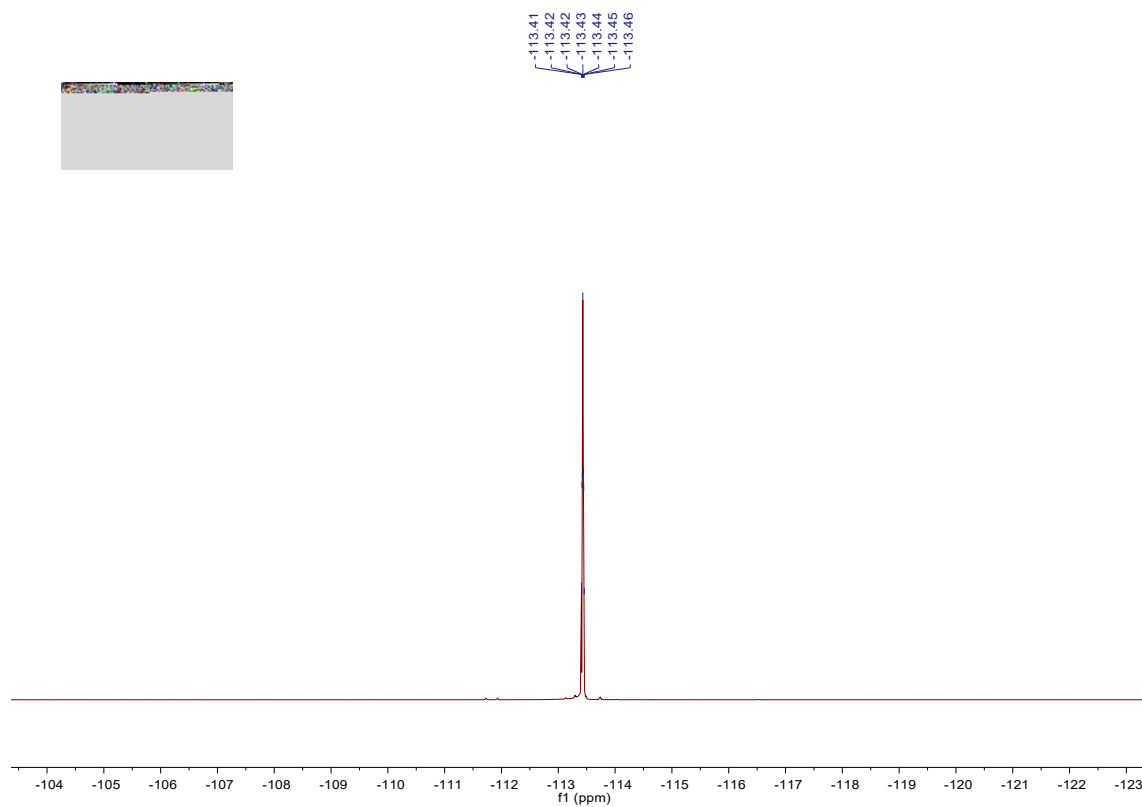

$^1\text{H}$  NMR of 1,2-Bis(4-chlorophenyl) disulfide (**2h**)<sup>[1]</sup>

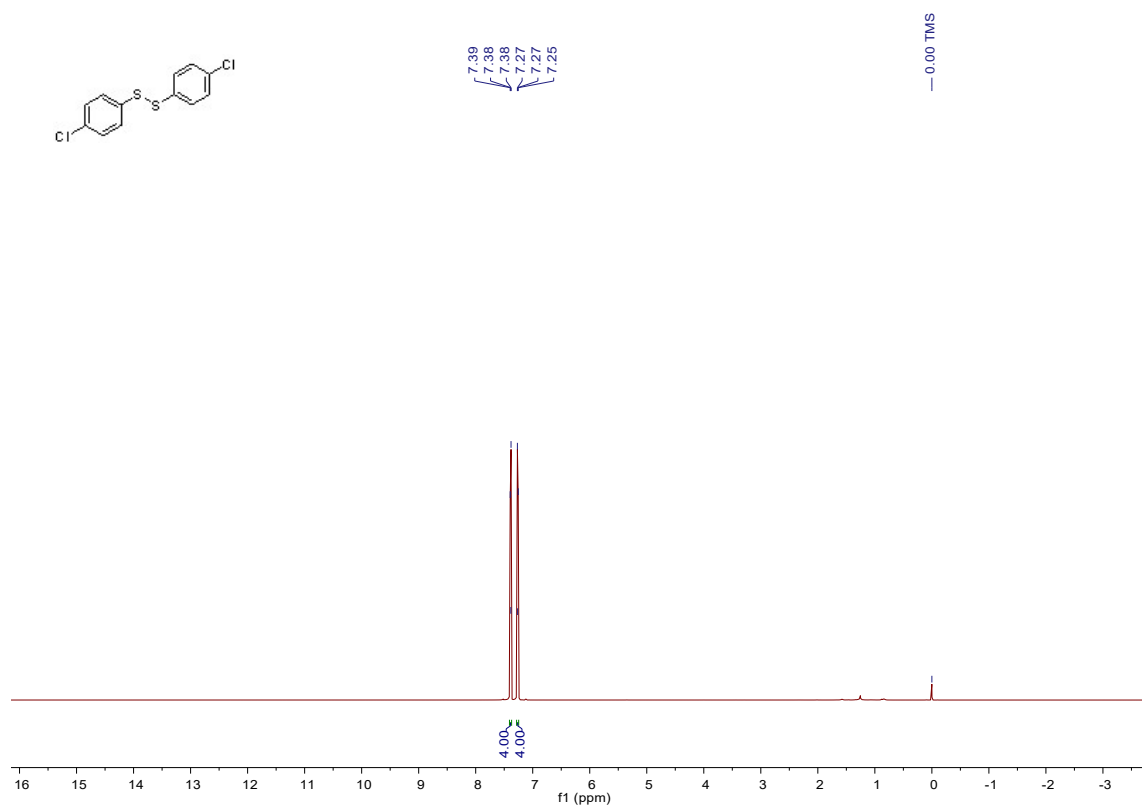

$^{13}\text{C}$  NMR of 1,2-Bis(4-chlorophenyl) disulfide (**2h**)<sup>[1]</sup>

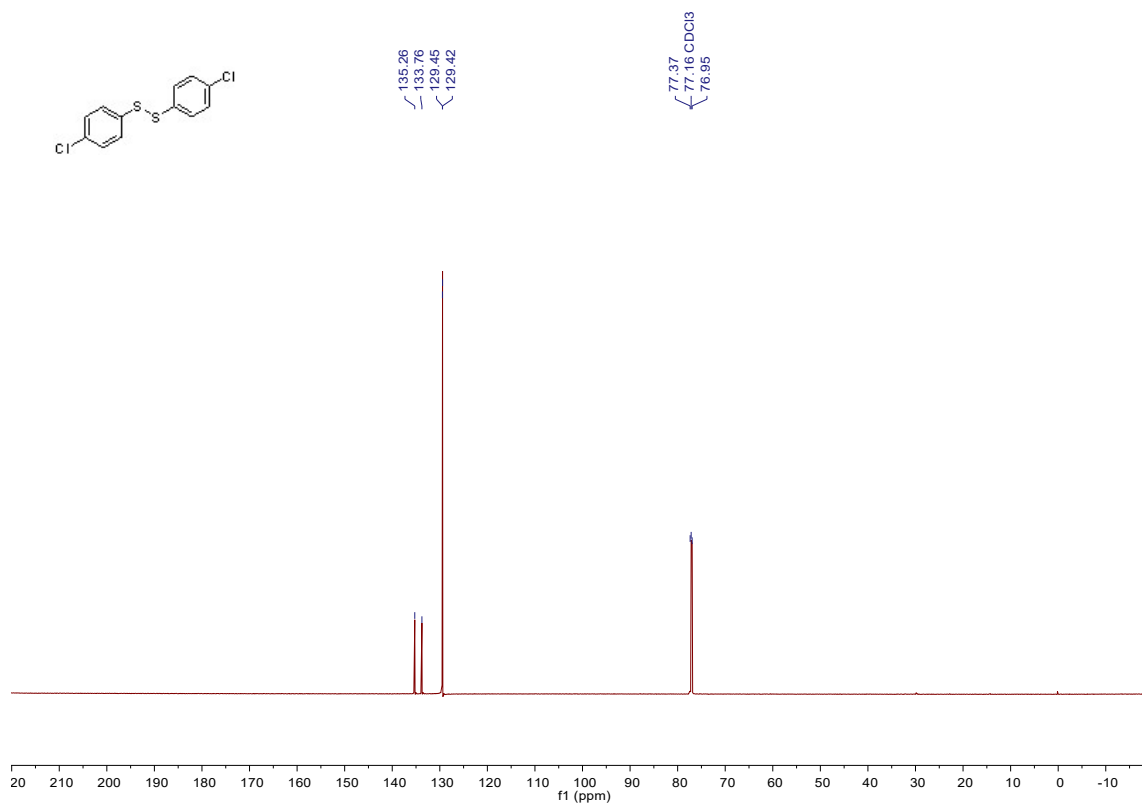

# $^1\text{H}$ NMR of 1,2-Bis(4-bromophenyl) disulfide (**2i**)

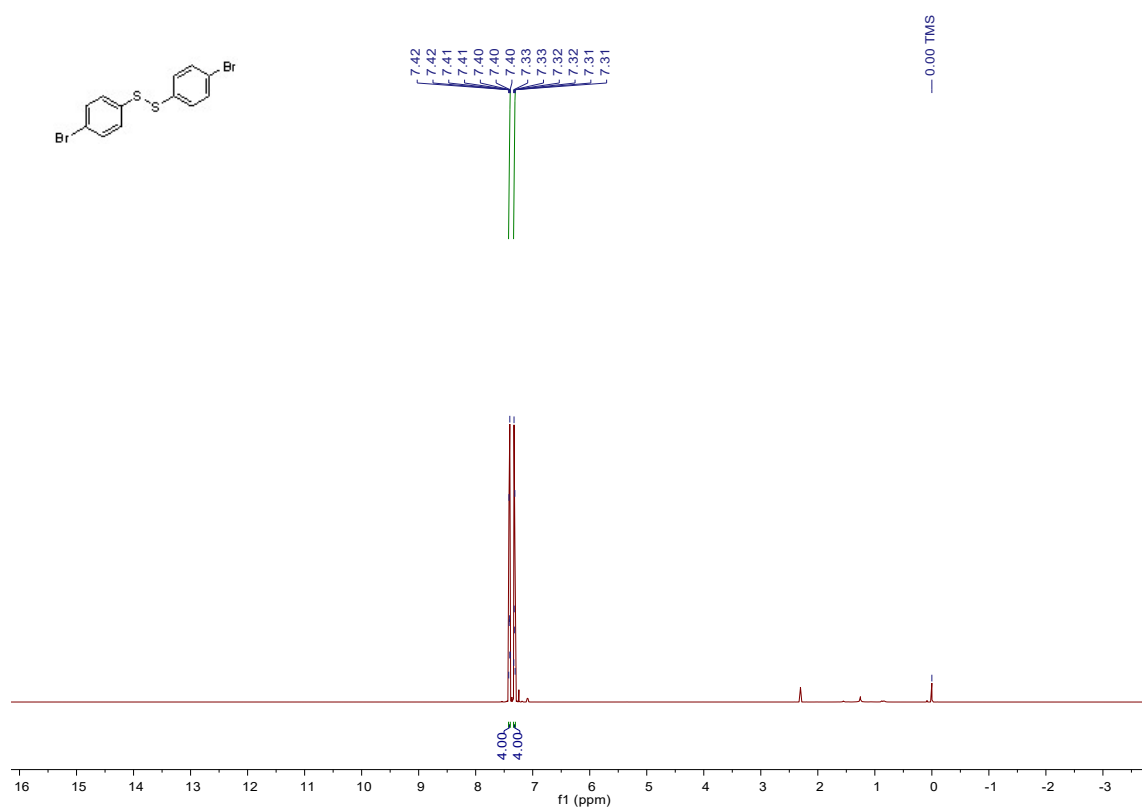

# $^{13}\text{C}$ NMR of 1,2-Bis(4-bromophenyl) disulfide (**2i**) [1]

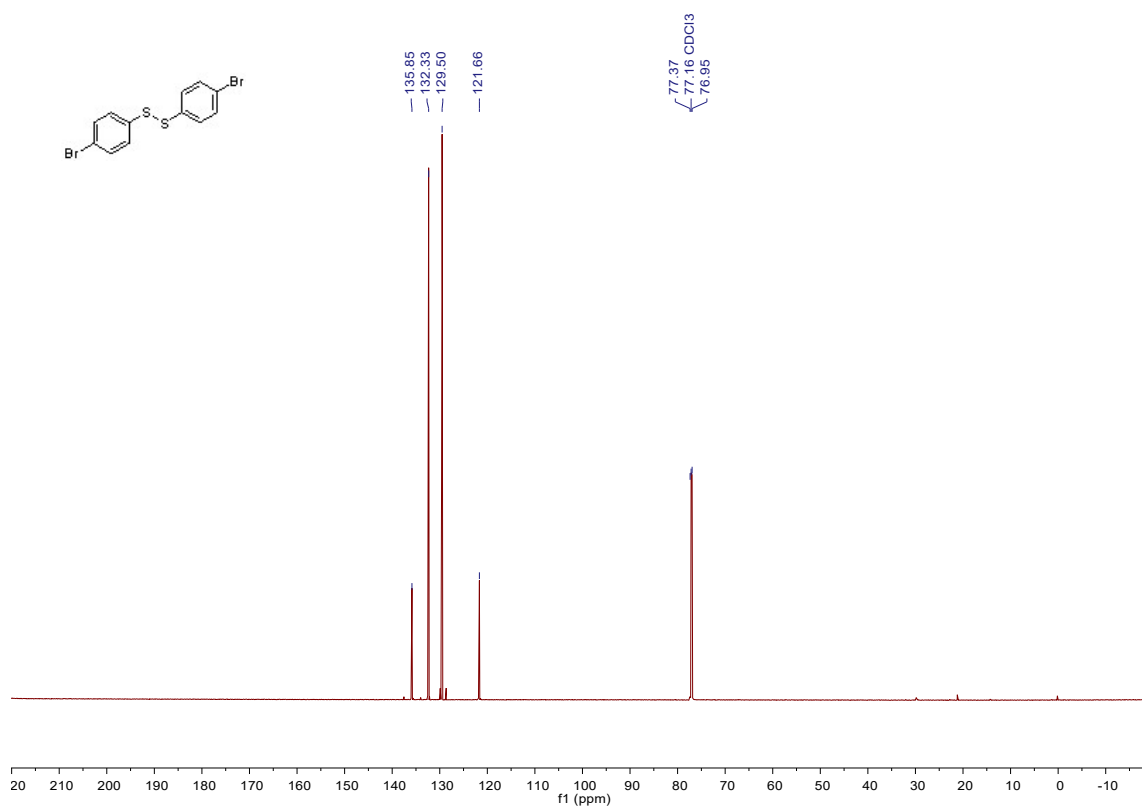

$^1\text{H}$  NMR of 1,2-Bis(4-nitrophenyl) disulfide (**2j**) [2]

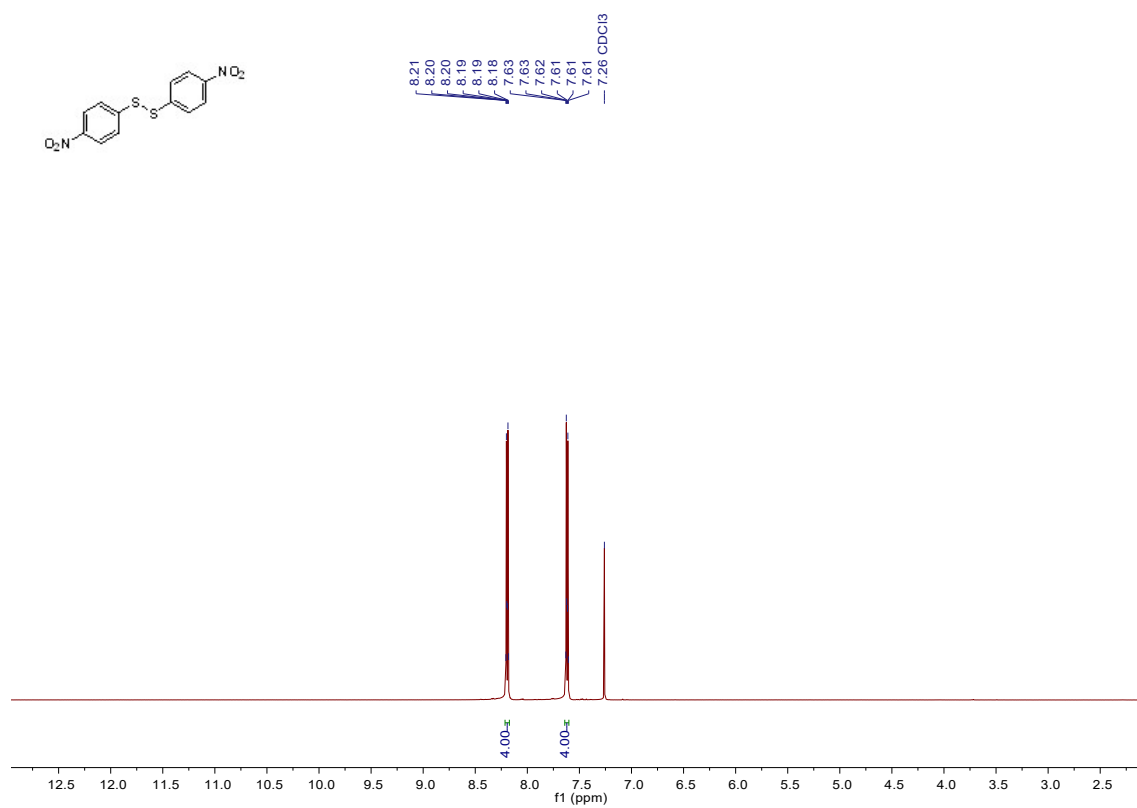

$^{13}\text{C}$  NMR of 1,2-Bis(4-nitrophenyl) disulfide (**2j**) [2]

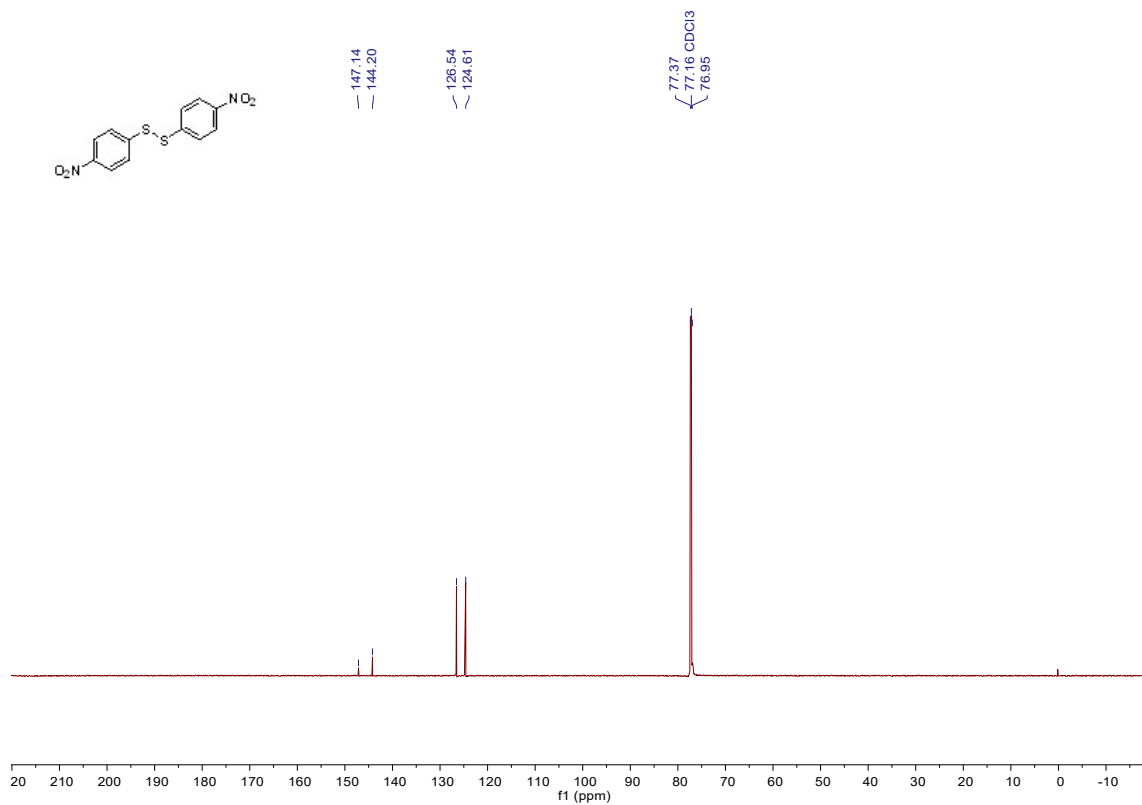

$^1\text{H}$  NMR of 1,2-di-m-tolyldisulfide (**2k**) [2]

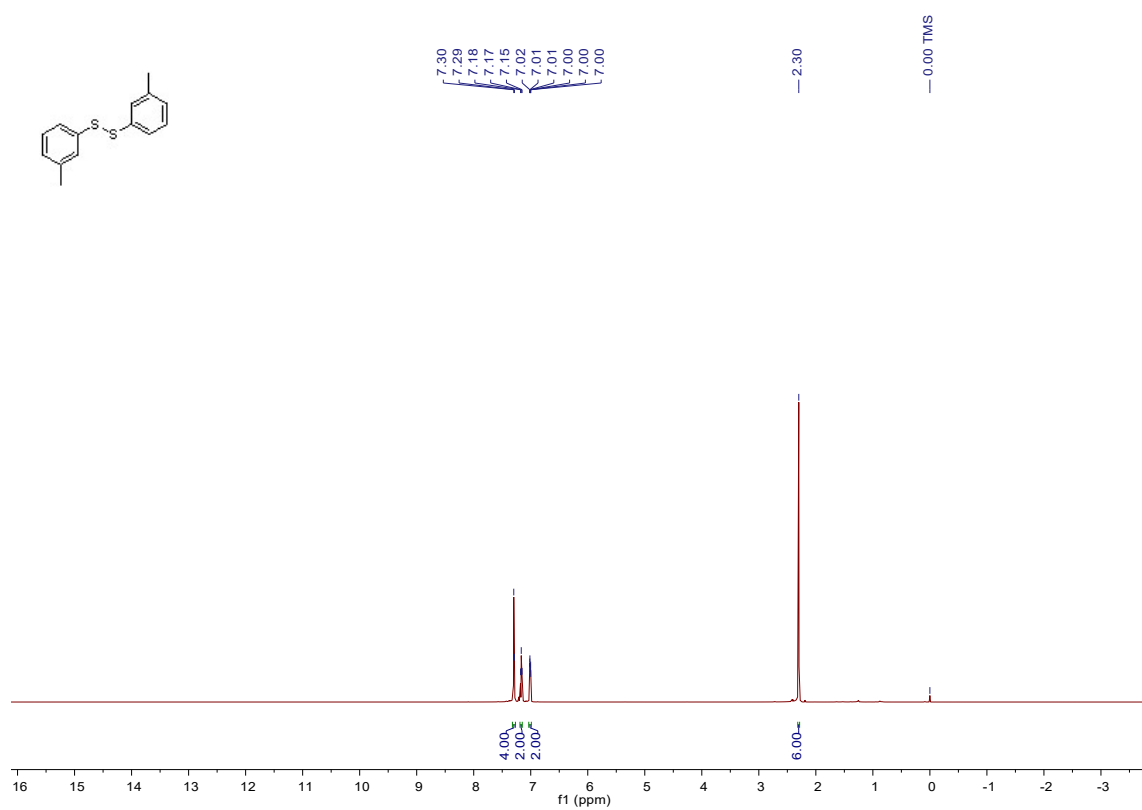

$^{13}\text{C}$  NMR of 1,2-di-m-tolyldisulfide (**2k**) [2]

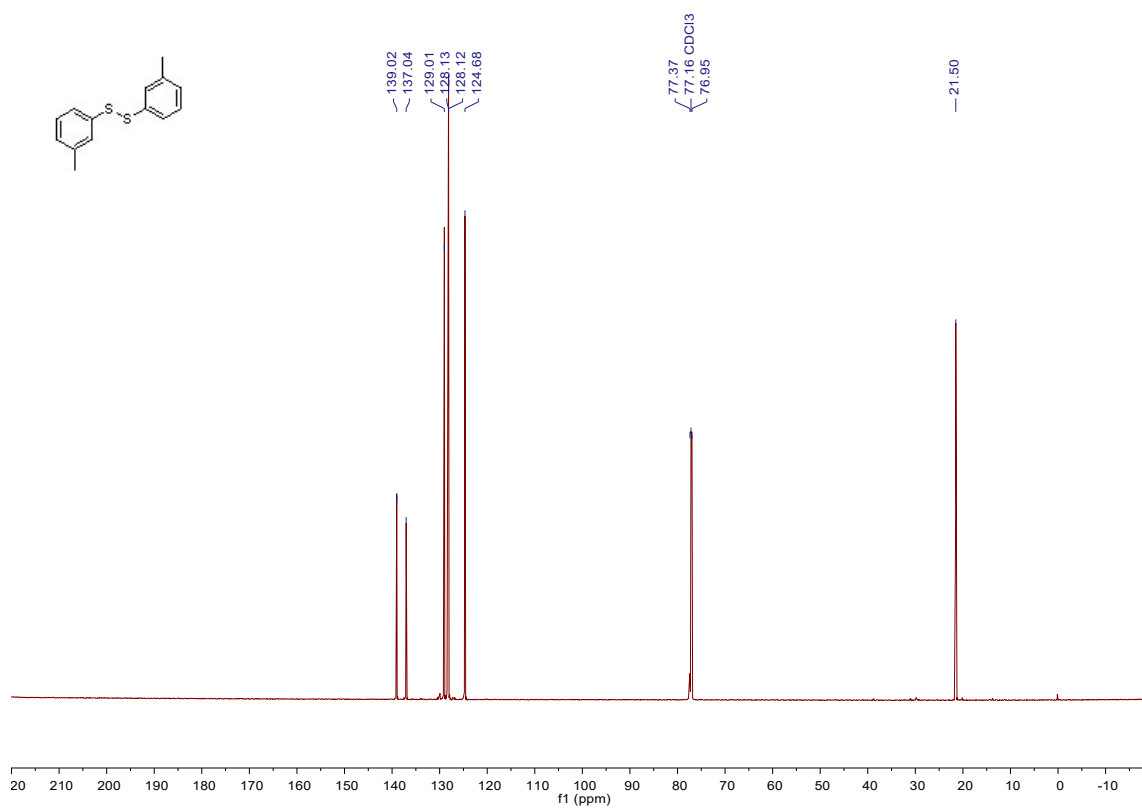

$^1\text{H}$  NMR of 1,2-Bis(3-bromophenyl) disulfide (**21**) [2]

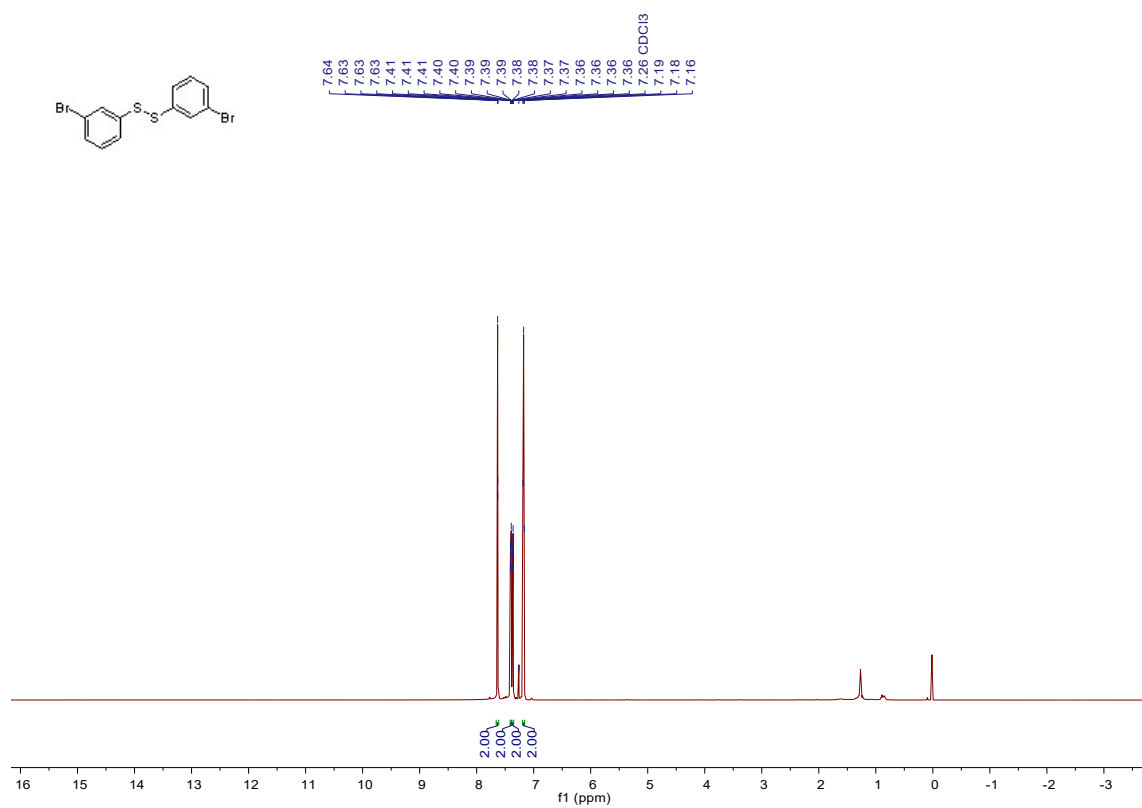

$^{13}\text{C}$  NMR of 1,2-Bis(3-bromophenyl) disulfide (**21**) [2]

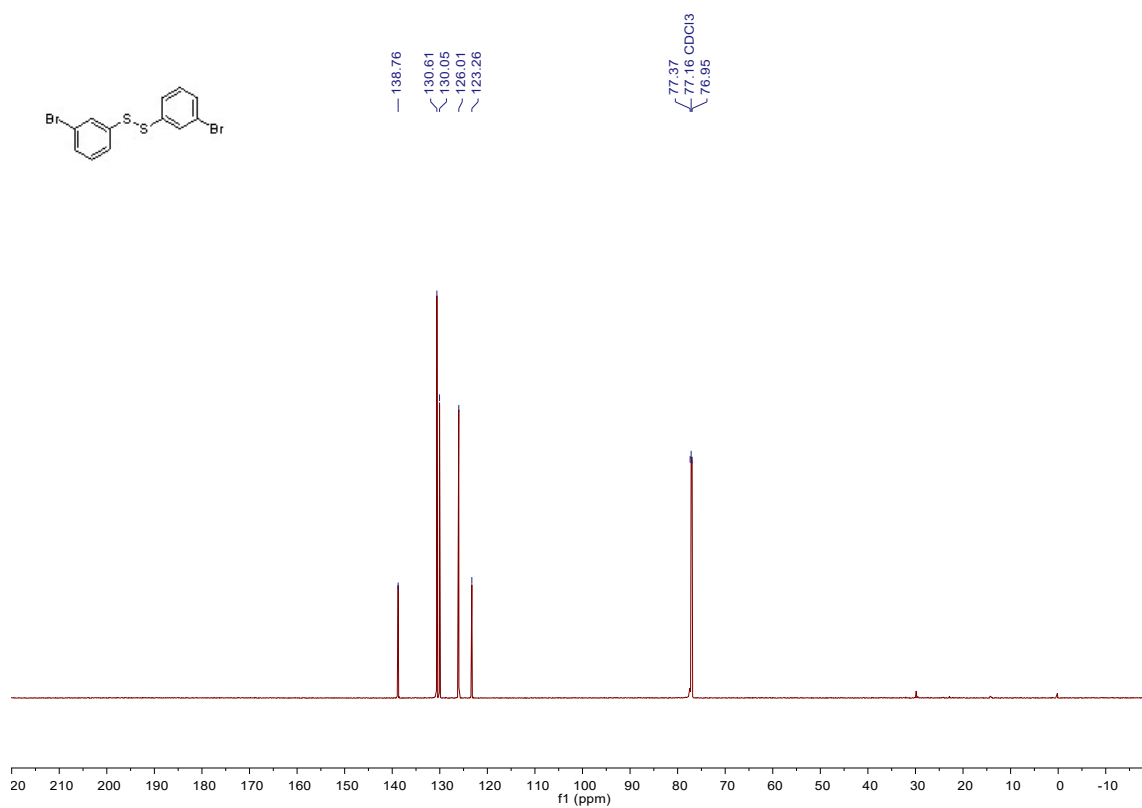

$^1\text{H}$  NMR of 1,2-Di(naphthalen-2-yl) disulfide (**2m**) [2]

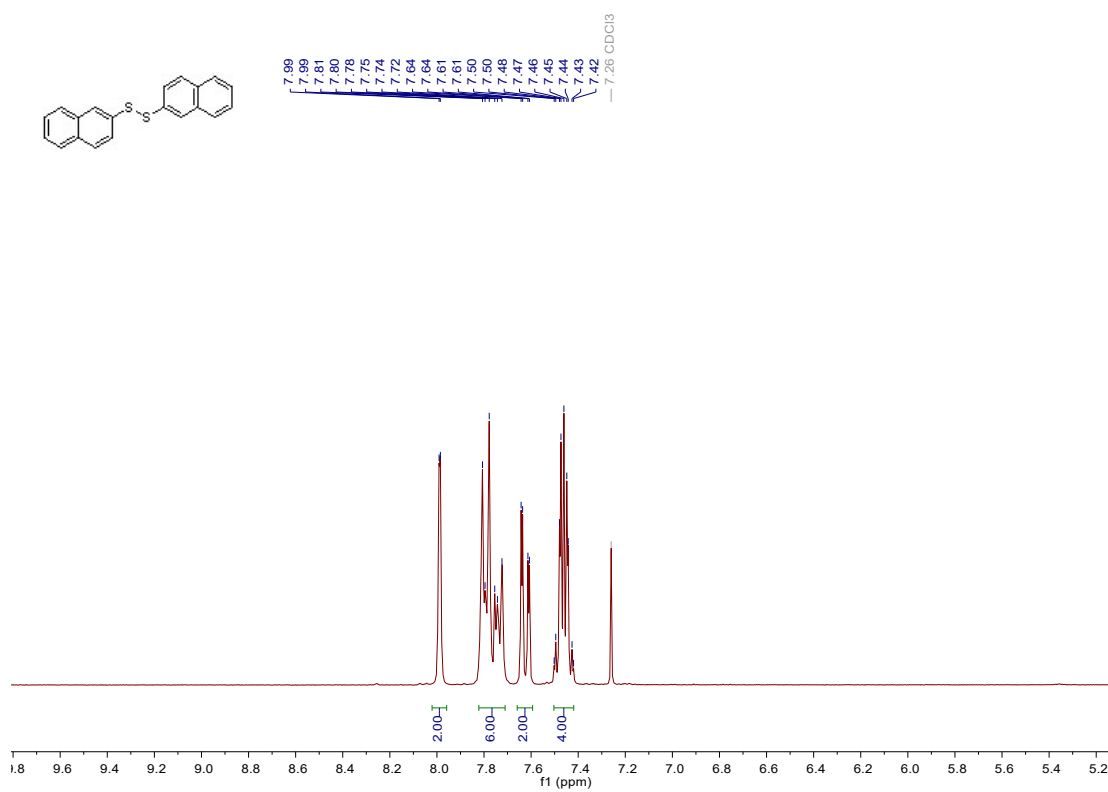

$^{13}\text{C}$  NMR of 1,2-Di(naphthalen-2-yl) disulfide (**2m**) [2]

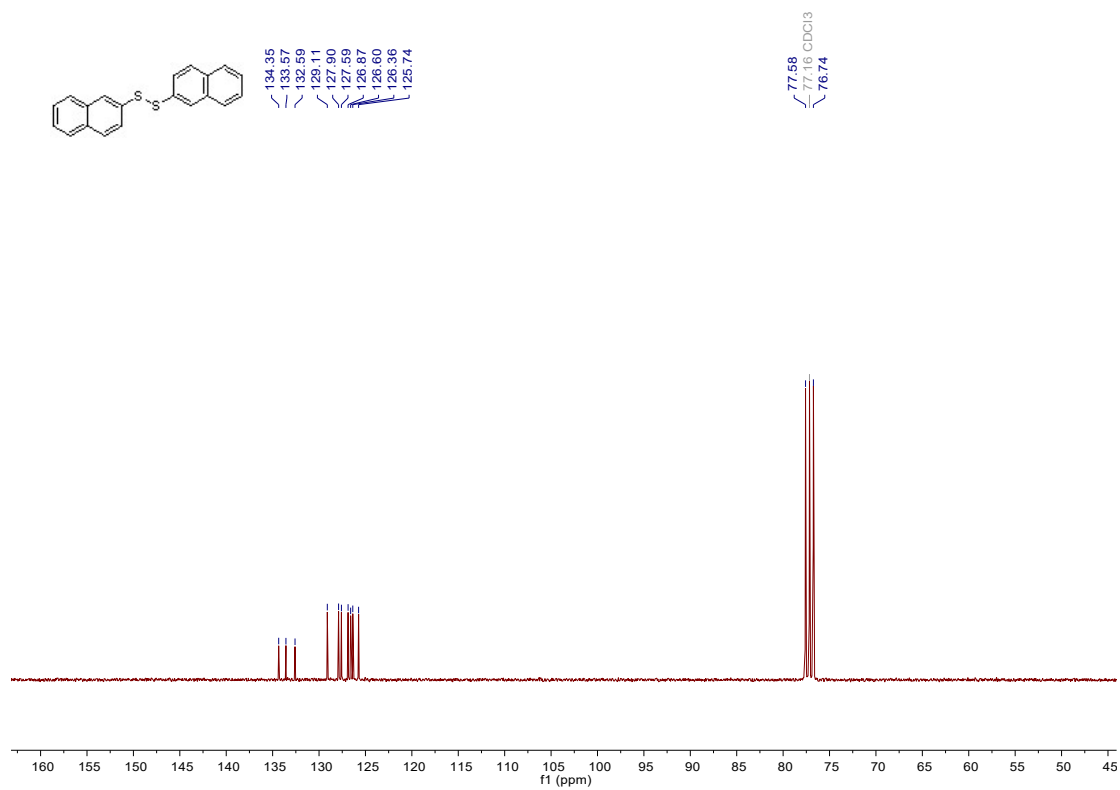

$^1\text{H}$  NMR of 1,2-Bis(5-chlorothiophen-2-yl) disulfide (**2n**) [2]

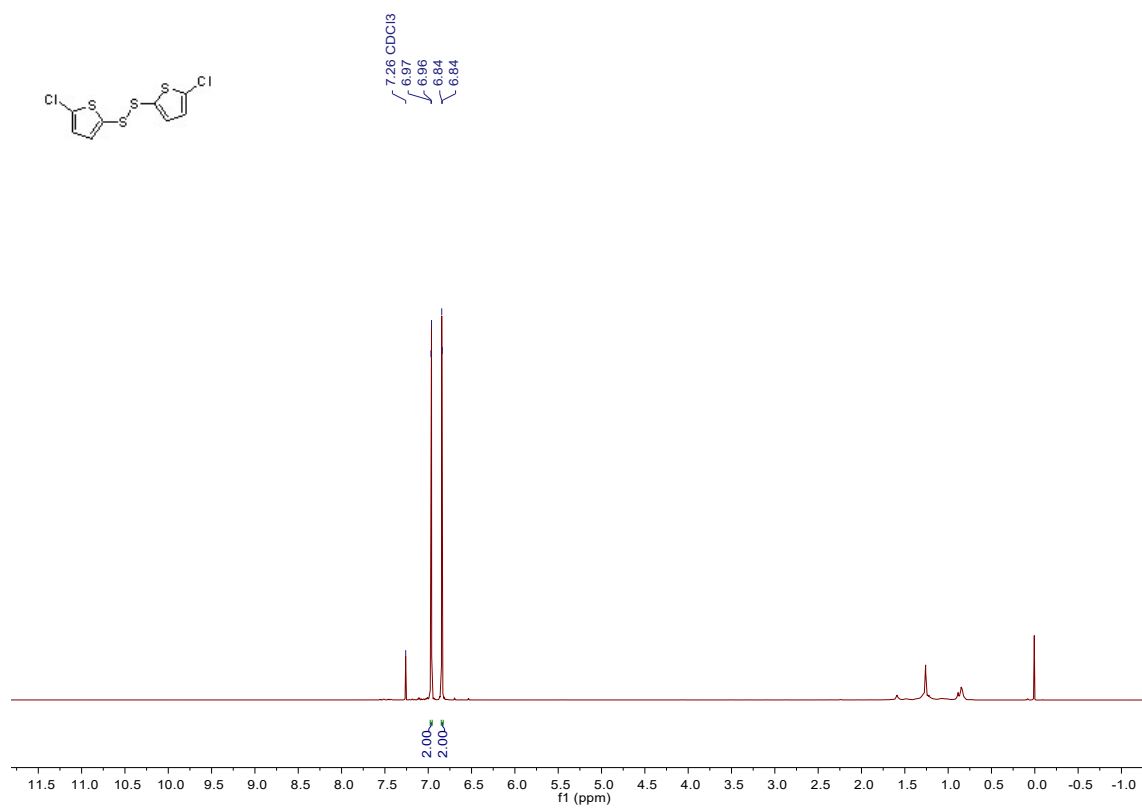

$^{13}\text{C}$  NMR of 1,2-Bis(5-chlorothiophen-2-yl) disulfide (**2n**) [2]

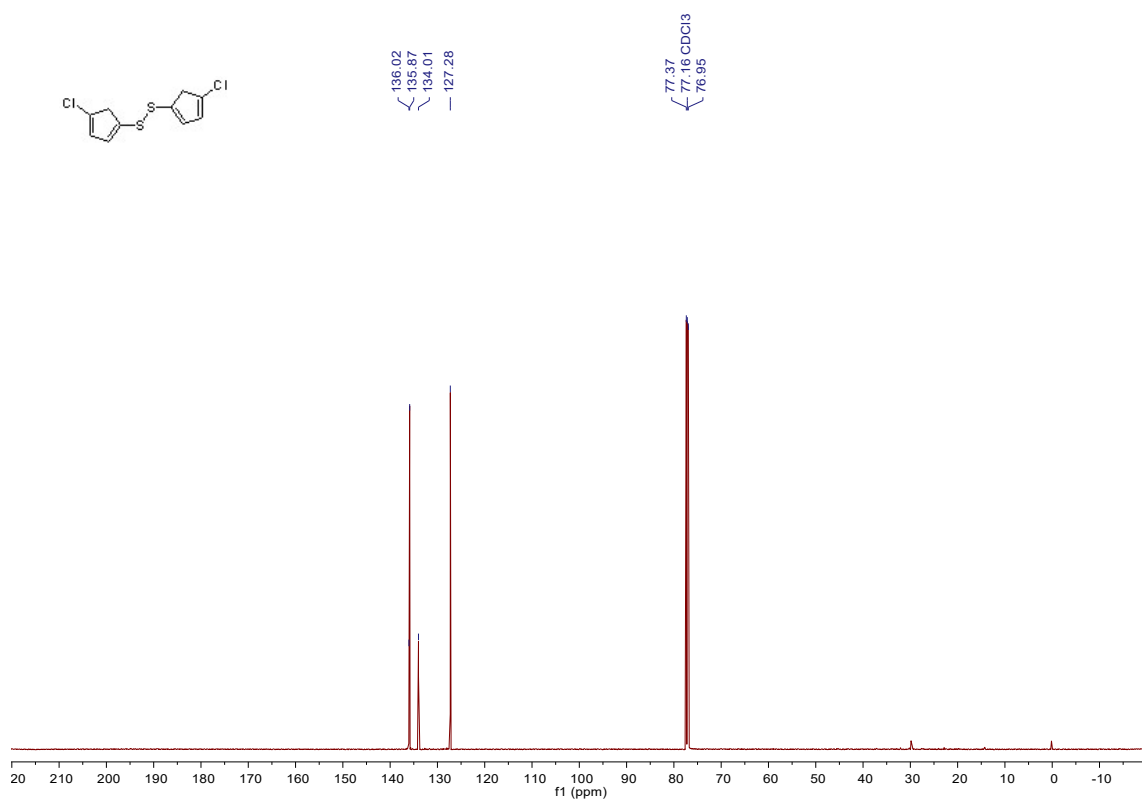



$^1\text{H}$  NMR of 1,2-Di(thiophen-2-yl) disulfide (**2o**) [2]

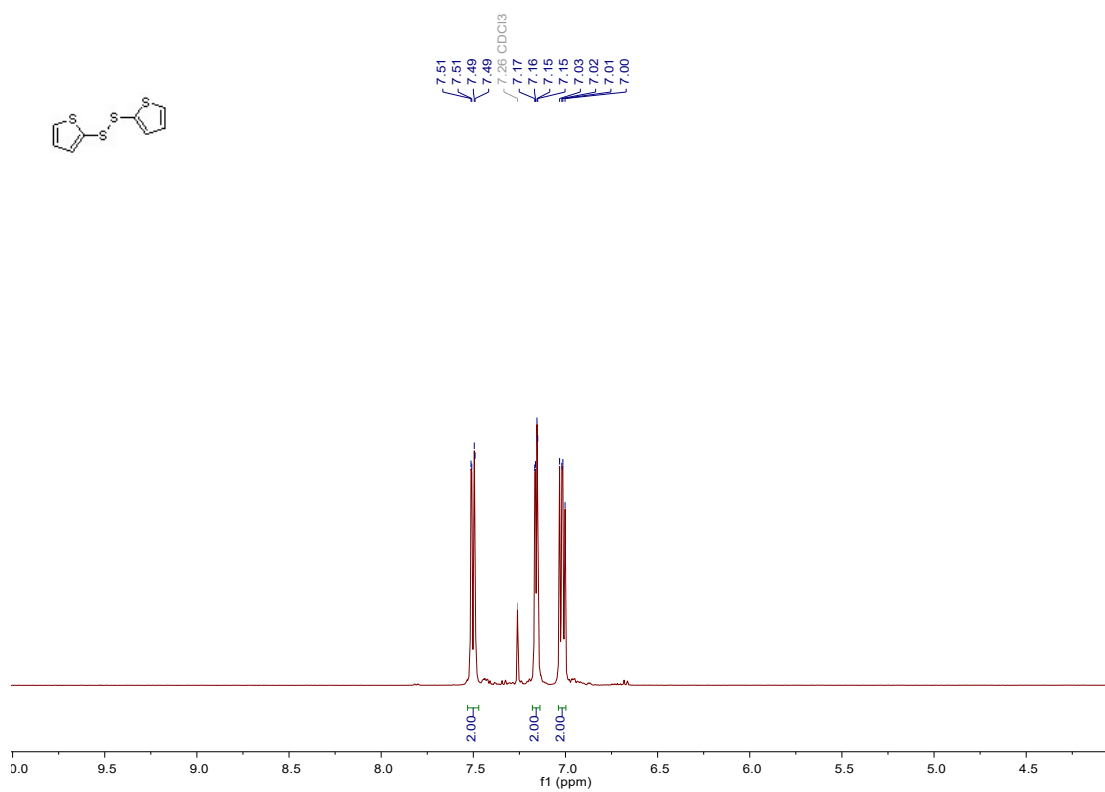

$^{13}\text{C}$  NMR of 1,2-Di(thiophen-2-yl) disulfide (**2o**) [2]

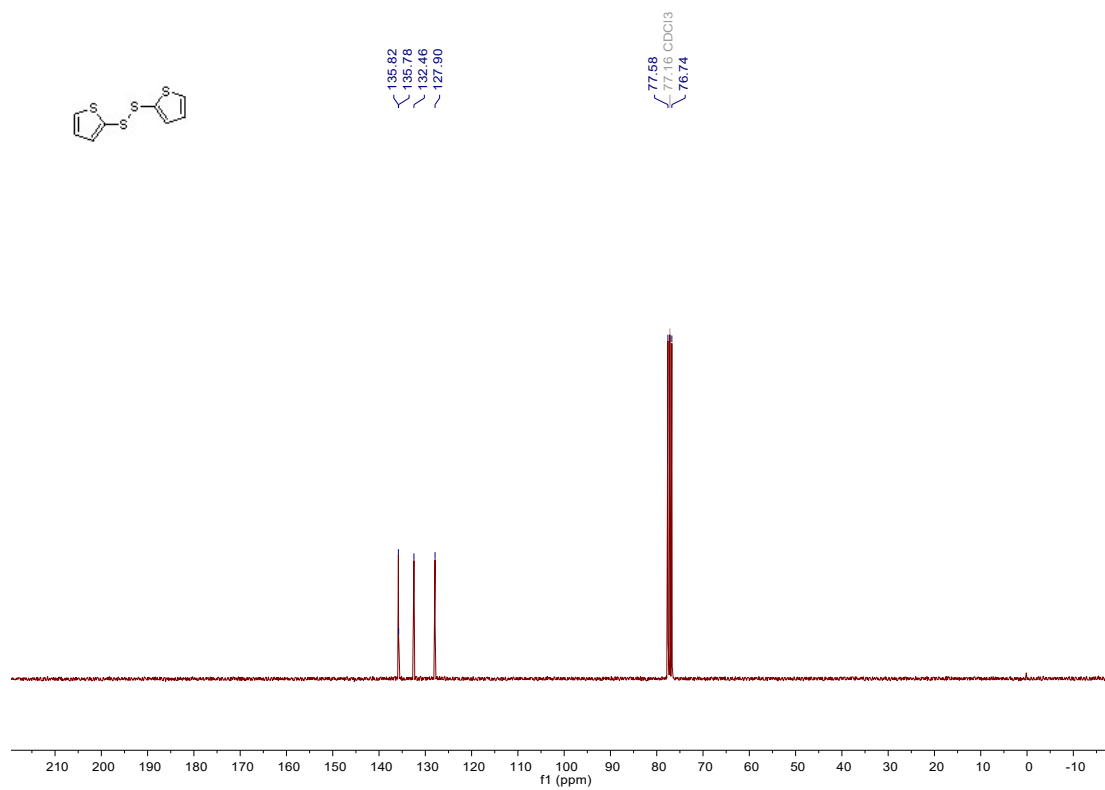



$^1\text{H}$  NMR of 1-cyclopropyl-2-(*p*-tolyl) disulfide (**2p**) [3]

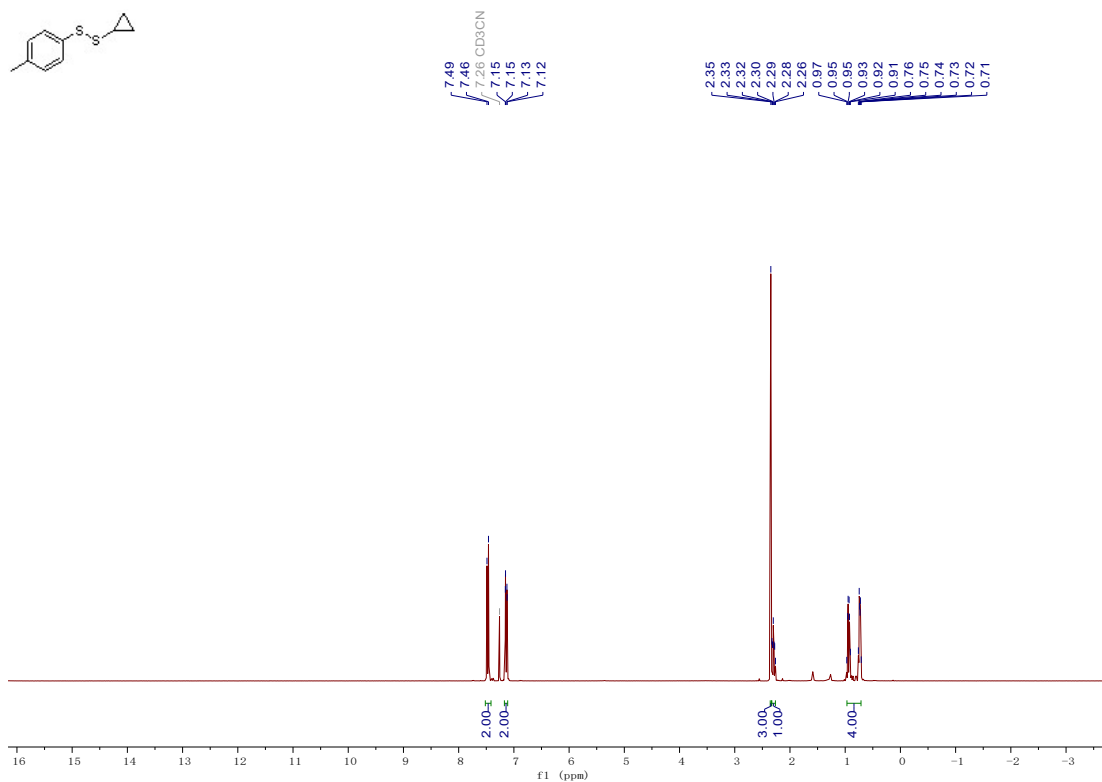

$^{13}\text{C}$  NMR of 1-cyclopropyl-2-(*p*-tolyl) disulfide (**2p**) [3]

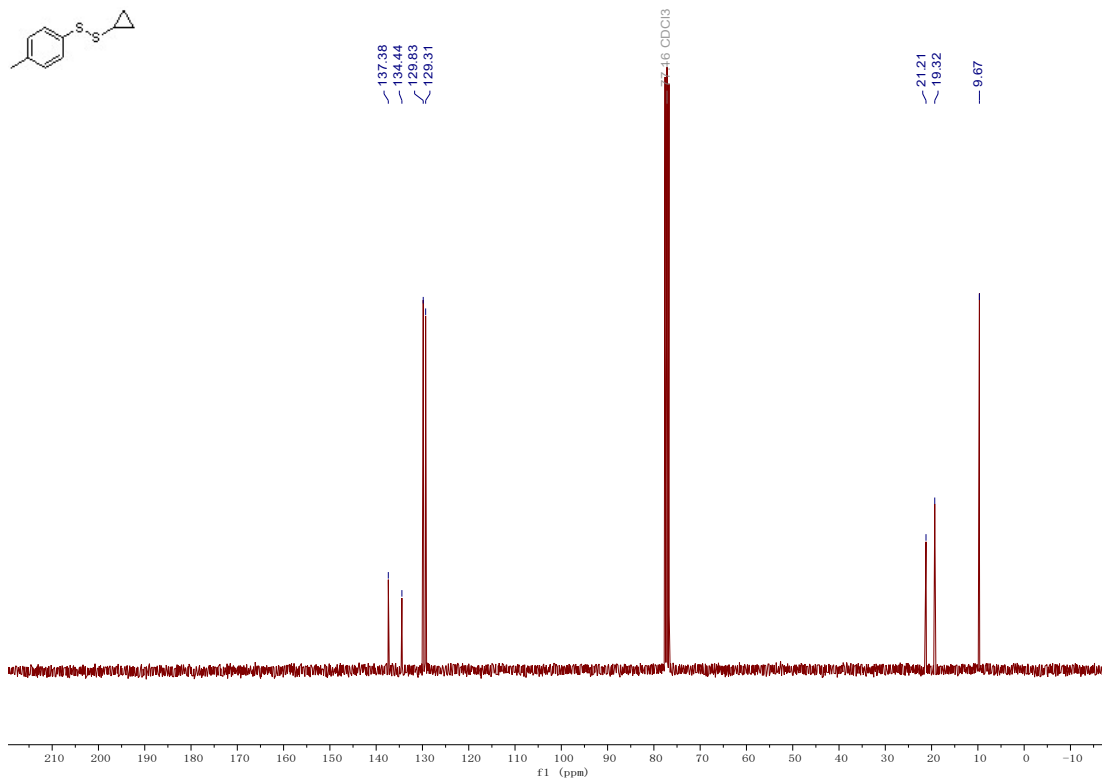



### $^1\text{H}$ NMR of 1-cyclopropyl-2-(4-methoxyphenyl) disulfide (**2q**) [3]

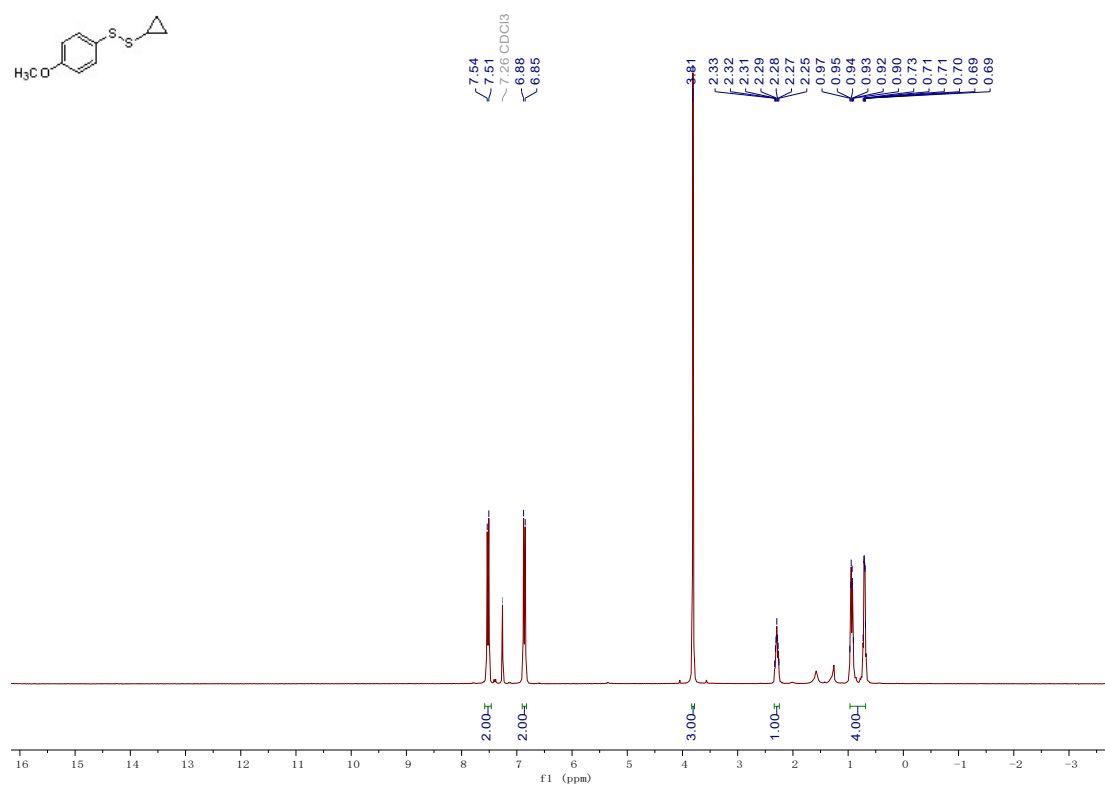

### $^{13}\text{C}$ NMR of 1-cyclopropyl-2-(4-methoxyphenyl) disulfide (**2q**) [3]

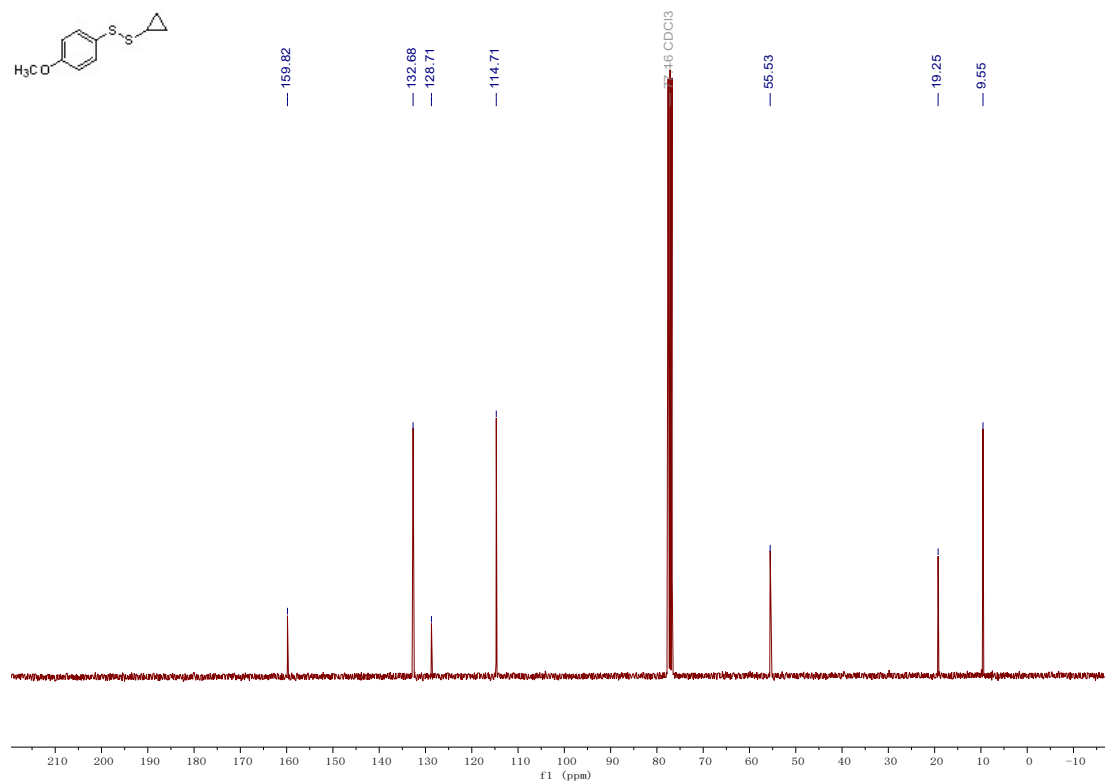



### $^1\text{H}$ NMR of 1-(4-chlorophenyl)-2-cyclopropylsulfide (**2r**) [3]

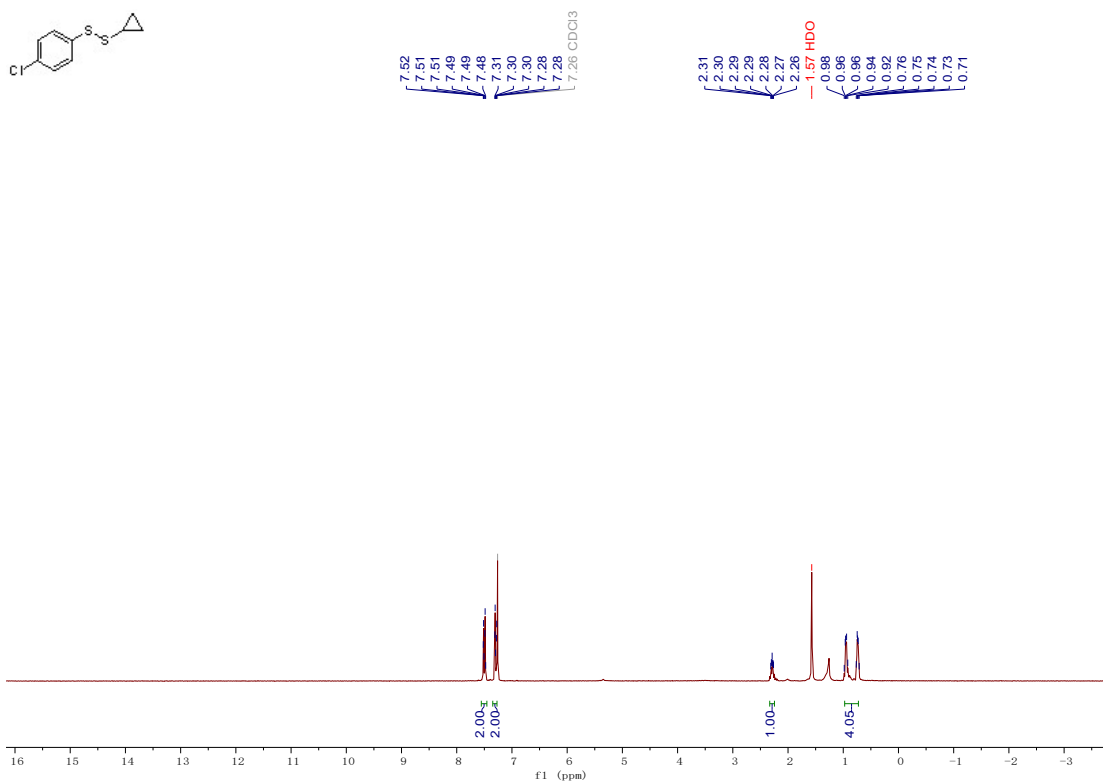

### $^{13}\text{C}$ NMR of 1-(4-chlorophenyl)-2-cyclopropylsulfide (**2r**) [3]

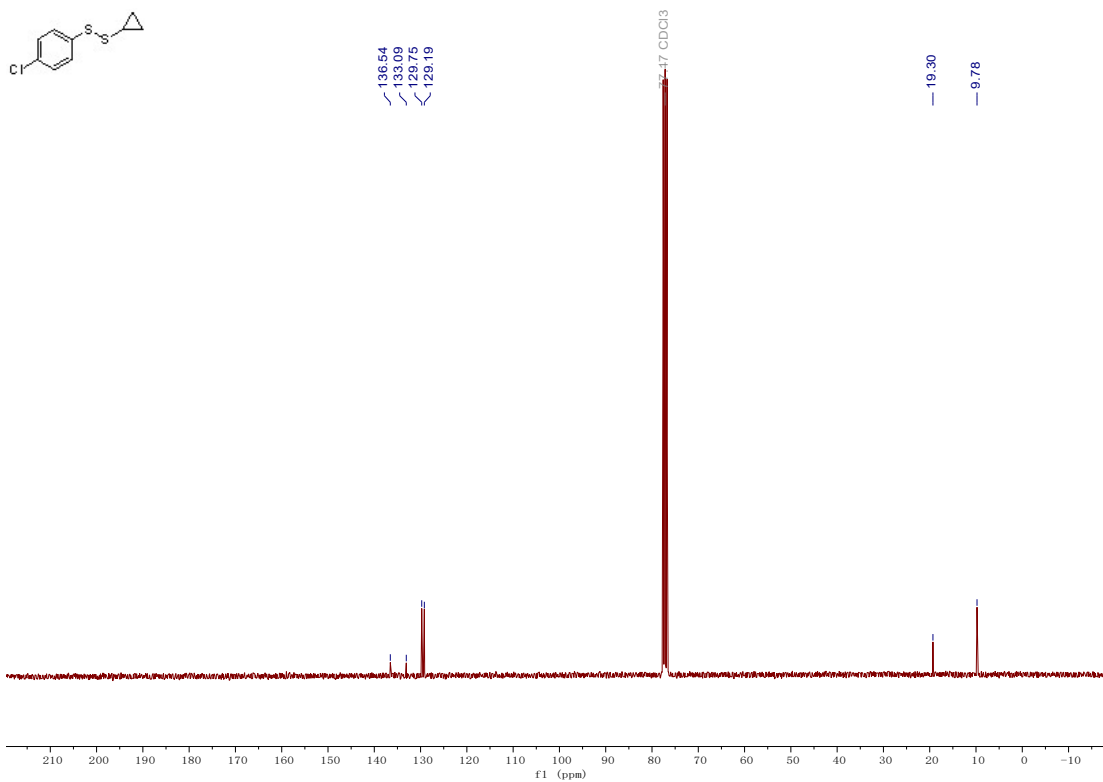

$^1\text{H}$  NMR of 2-chloro-5-(cyclopropylsulfaneyl) thiophene (**2s**)<sup>[3]</sup>

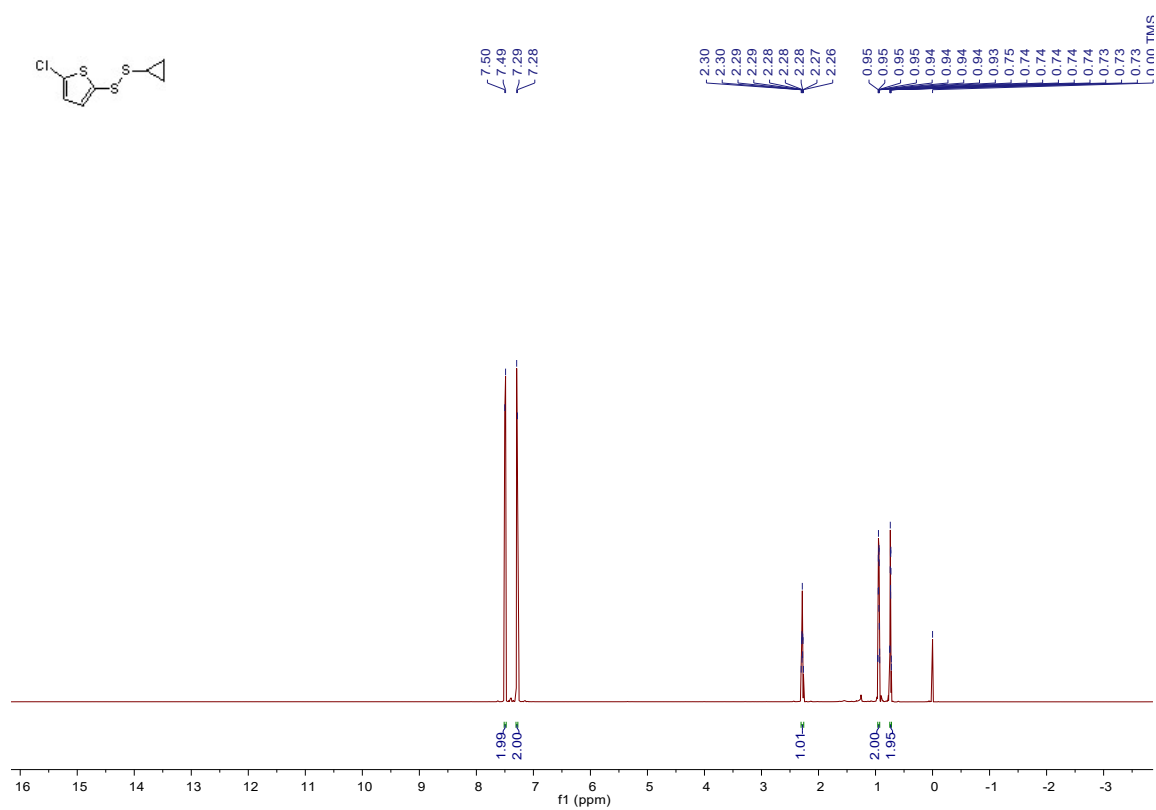

$^{13}\text{C}$  NMR of 2-chloro-5-(cyclopropylsulfaneyl) thiophene (**2s**)<sup>[3]</sup>

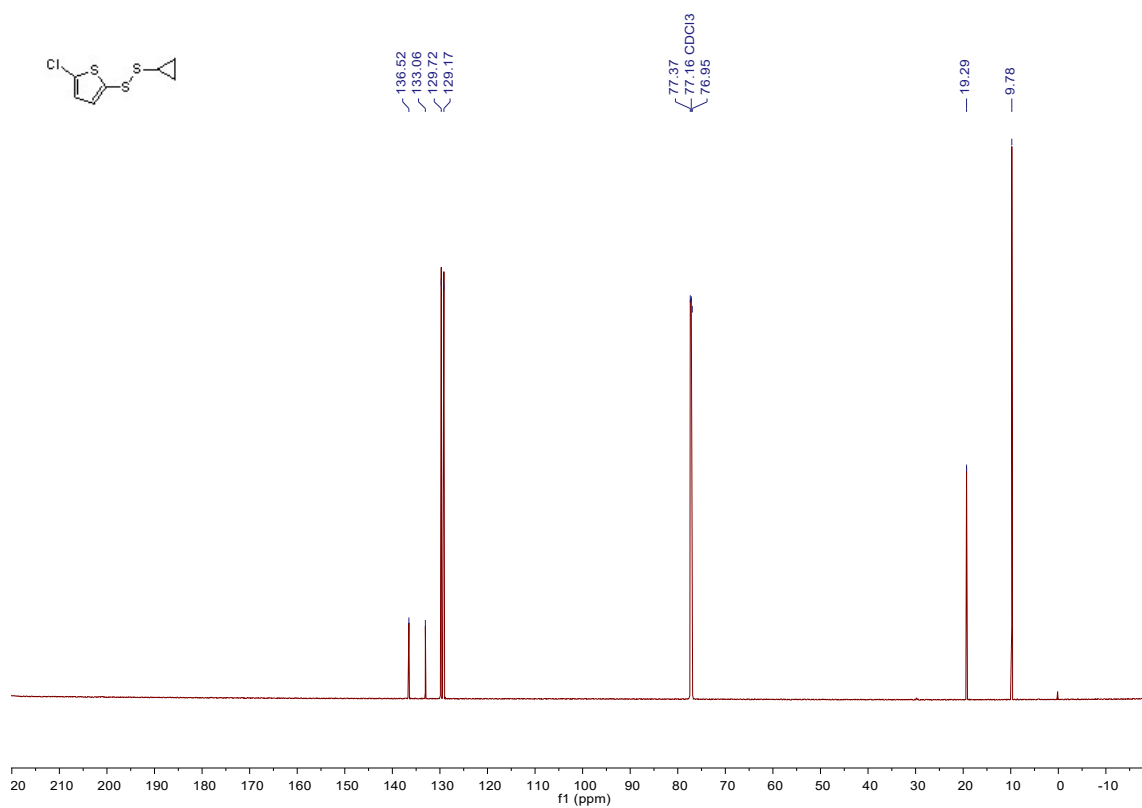





$^1\text{H}$  NMR of S-(*p*-tolyl) 4-methylbenzenesulfonothioate (**3a**) [4]

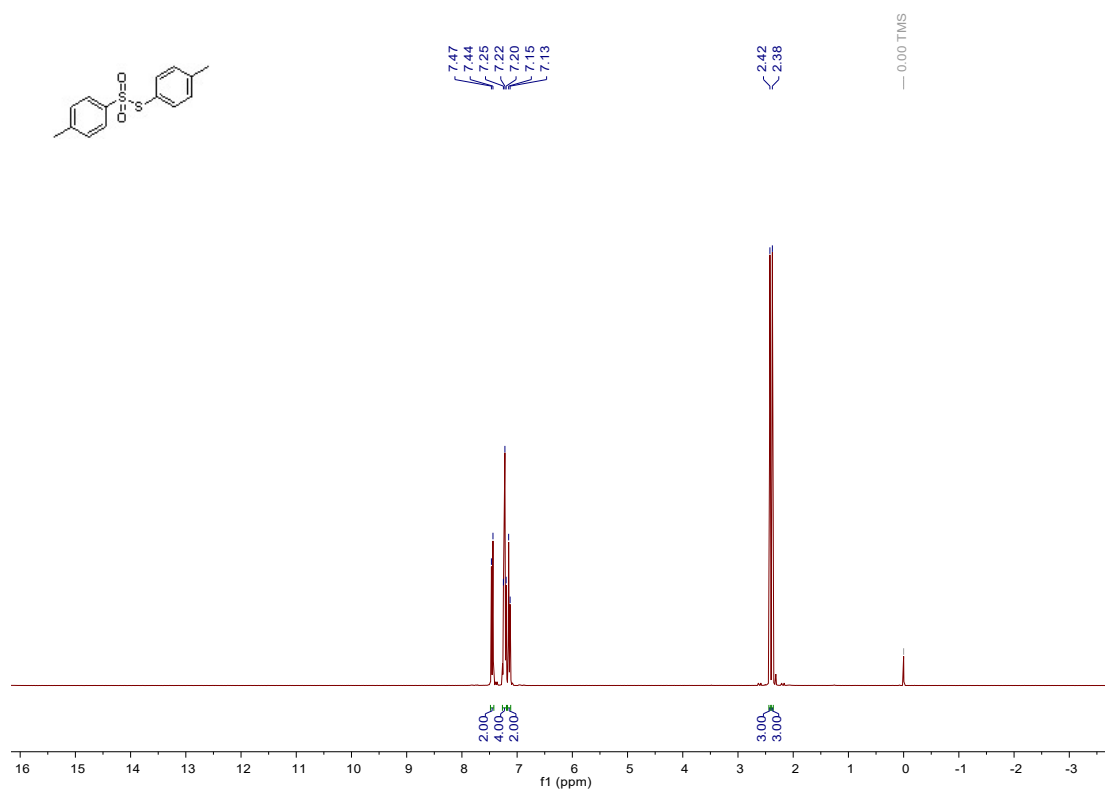

$^{13}\text{C}$  NMR of S-(*p*-tolyl) 4-methylbenzenesulfonothioate (**3a**) [4]

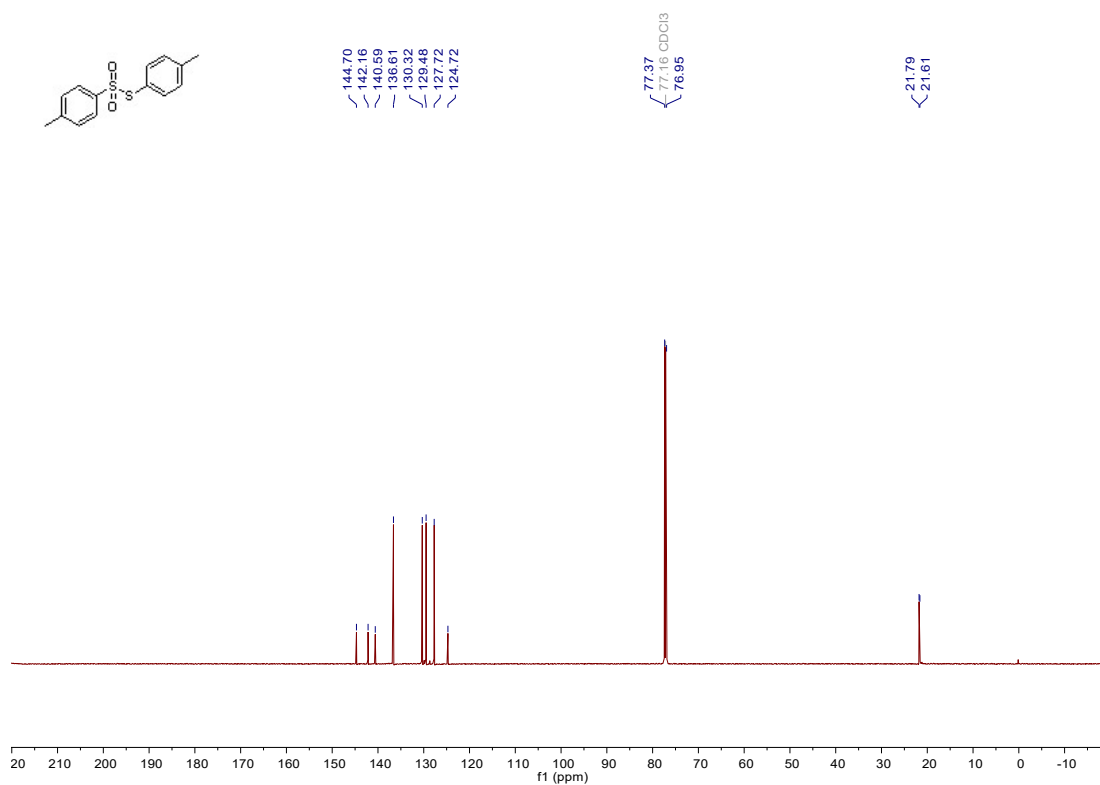



$^1\text{H}$  NMR of S-phenyl benzenesulfonylthioate (**3b**) [4]

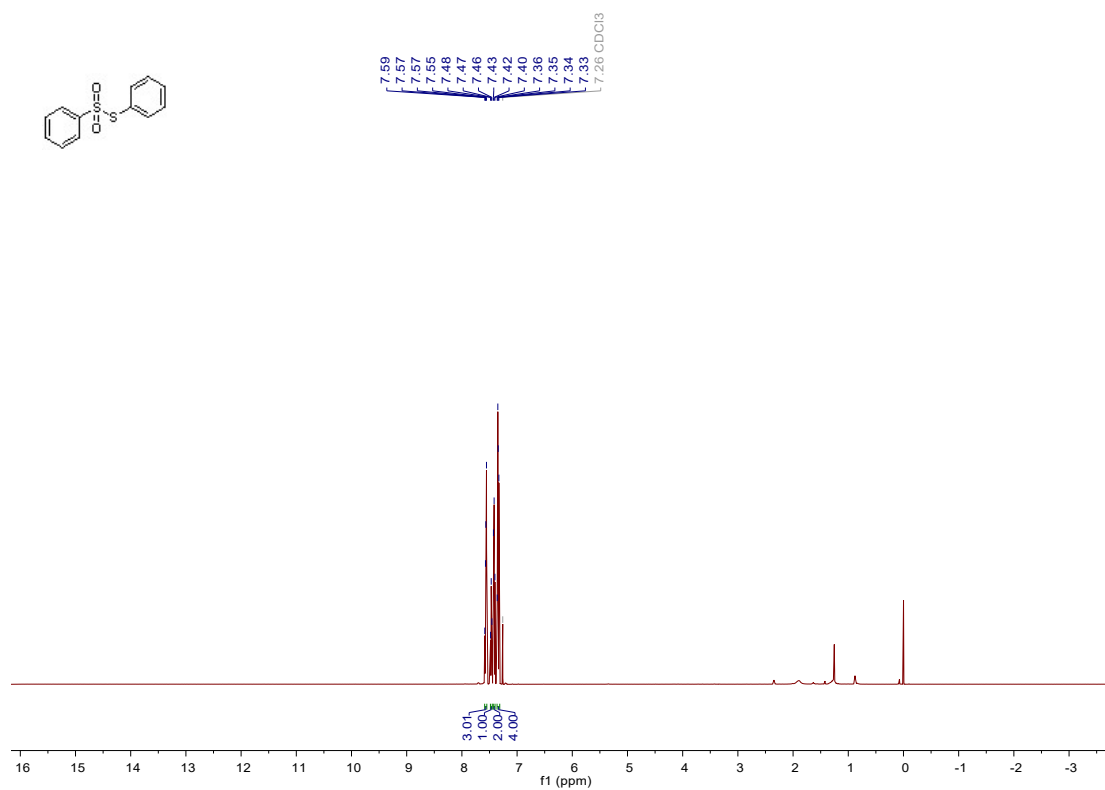

$^{13}\text{C}$  NMR of S-phenyl benzenesulfonylthioate (**3b**) [4]

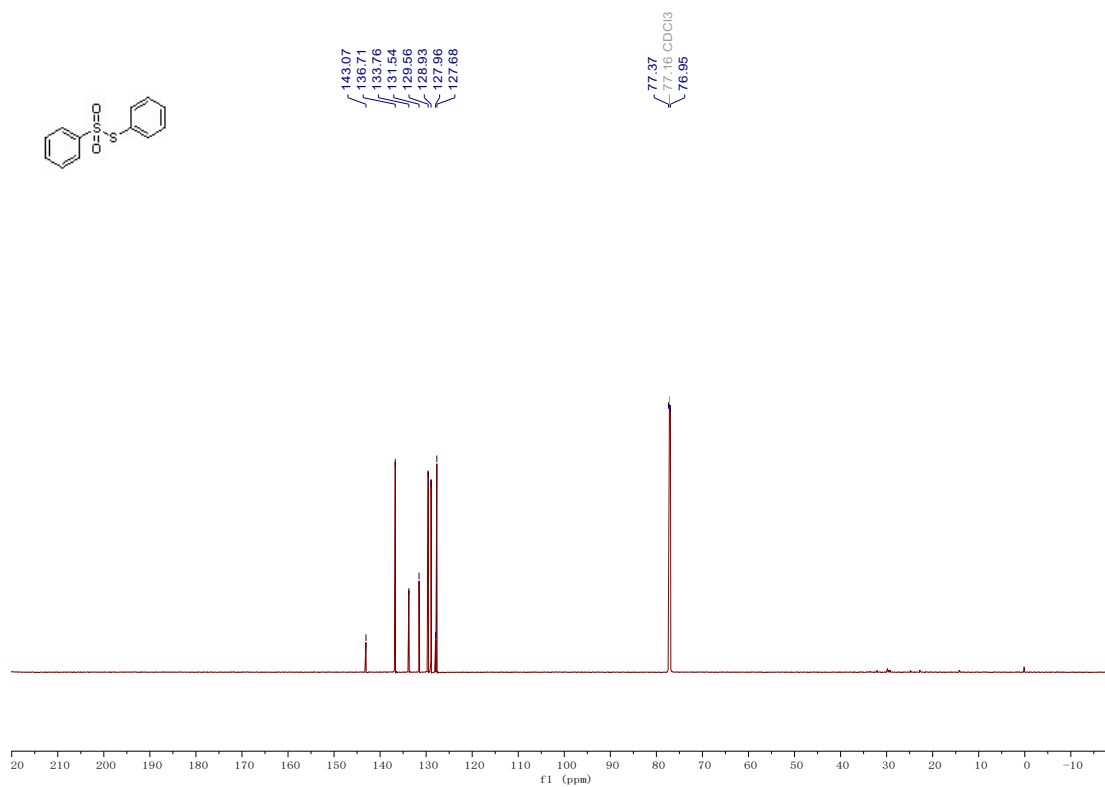

<sup>1</sup>H NMR of S-4-(Isopropyl)phenyl-4-isopropylbenzenesulfonothioate (**3c**)<sup>[4]</sup>

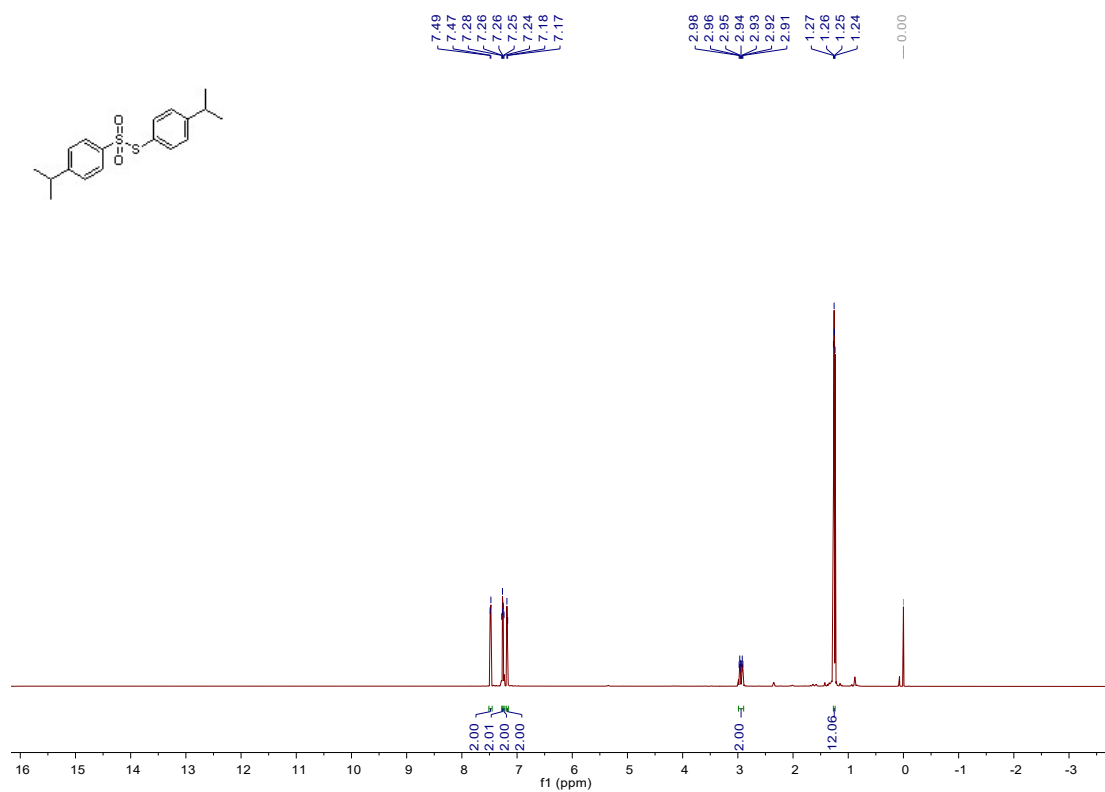

<sup>13</sup>C NMR of S-4-(Isopropyl)phenyl-4-isopropylbenzenesulfonothioate (**3c**)<sup>[4]</sup>

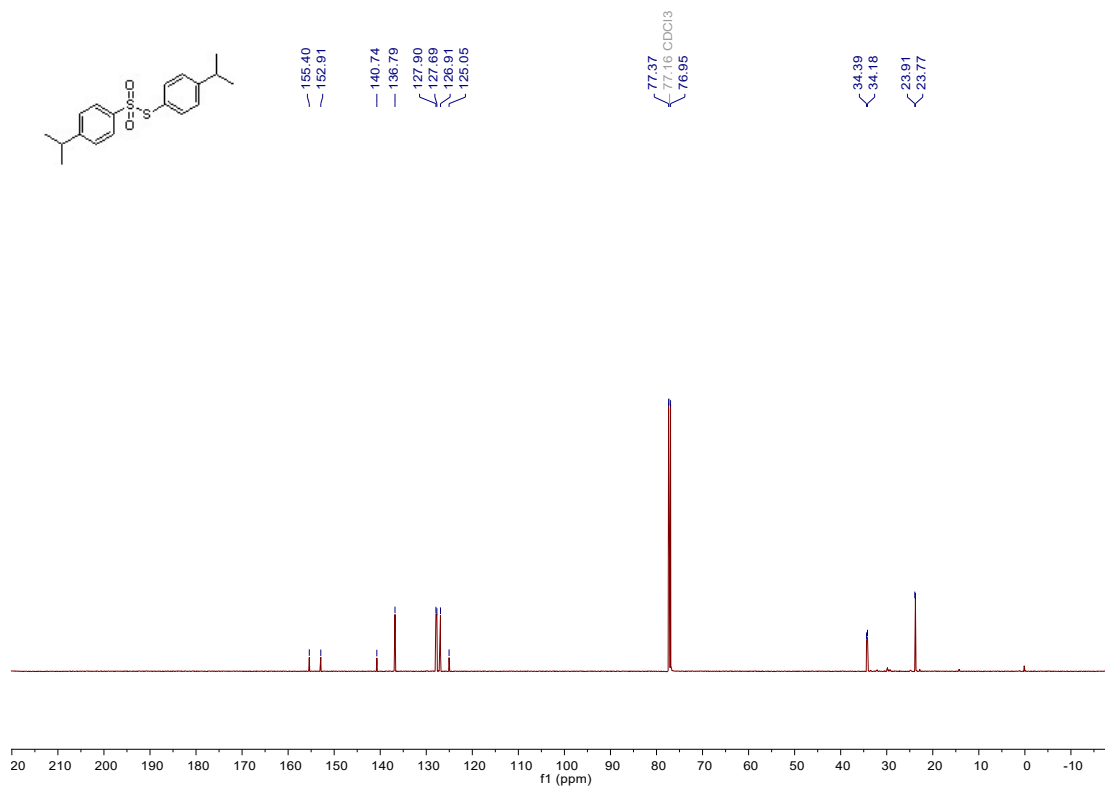

$^1\text{H}$  NMR of S-(4-methoxyphenyl) 4-methoxybenzenesulfonylthioate (**3d**) [4]

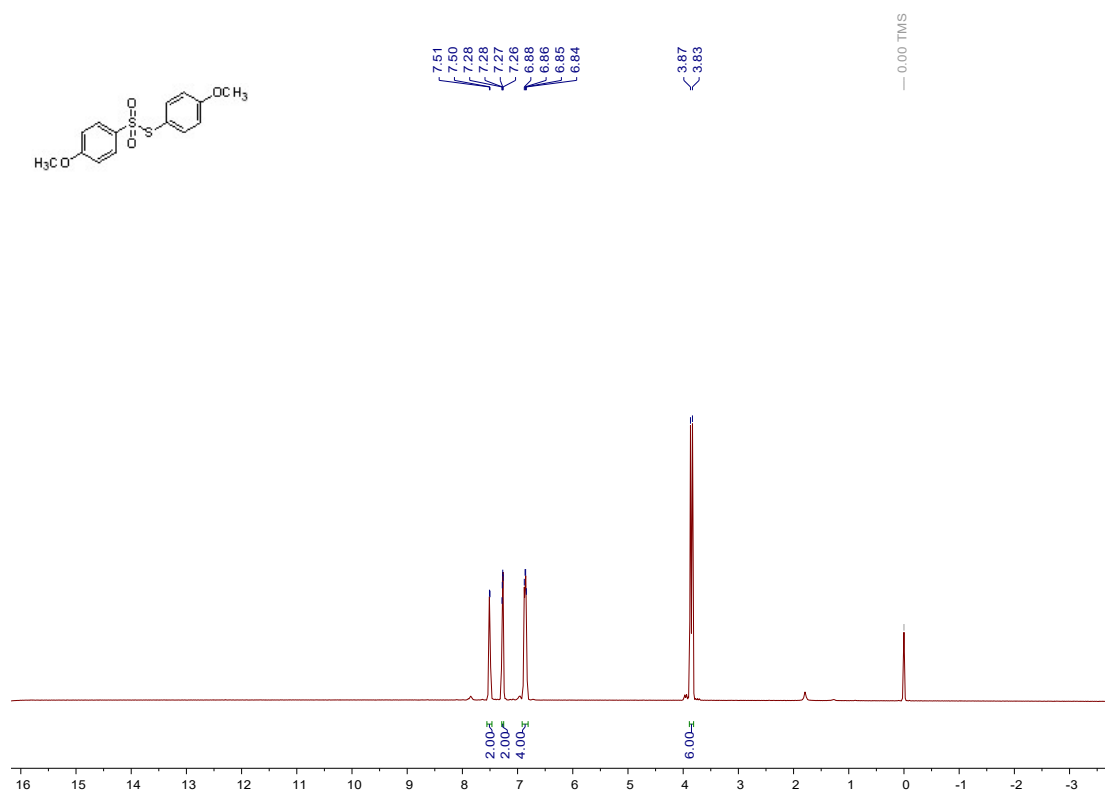

$^{13}\text{C}$  NMR of S-(4-methoxyphenyl) 4-methoxybenzenesulfonylthioate (**3d**) [4]

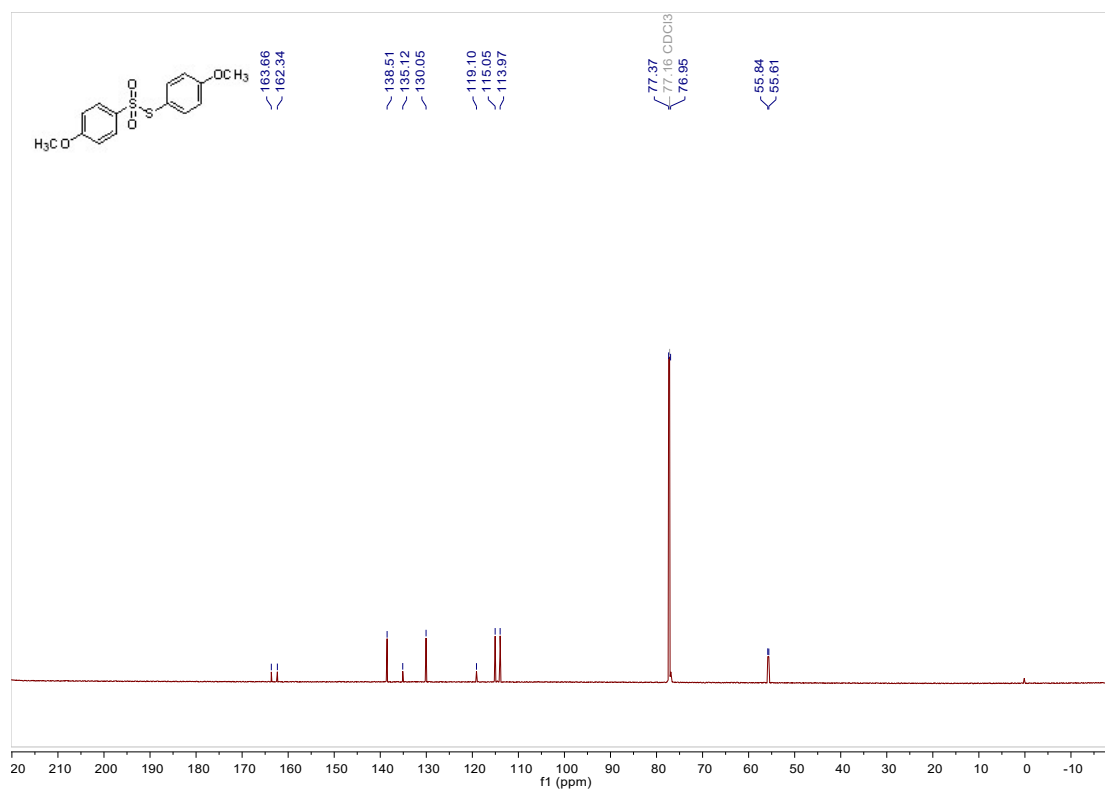

$^1\text{H}$  NMR of S-([1,1'-biphenyl]-4-yl)-[1,1'-biphenyl]-4-sulfonothioate (**3e**)<sup>[5]</sup>

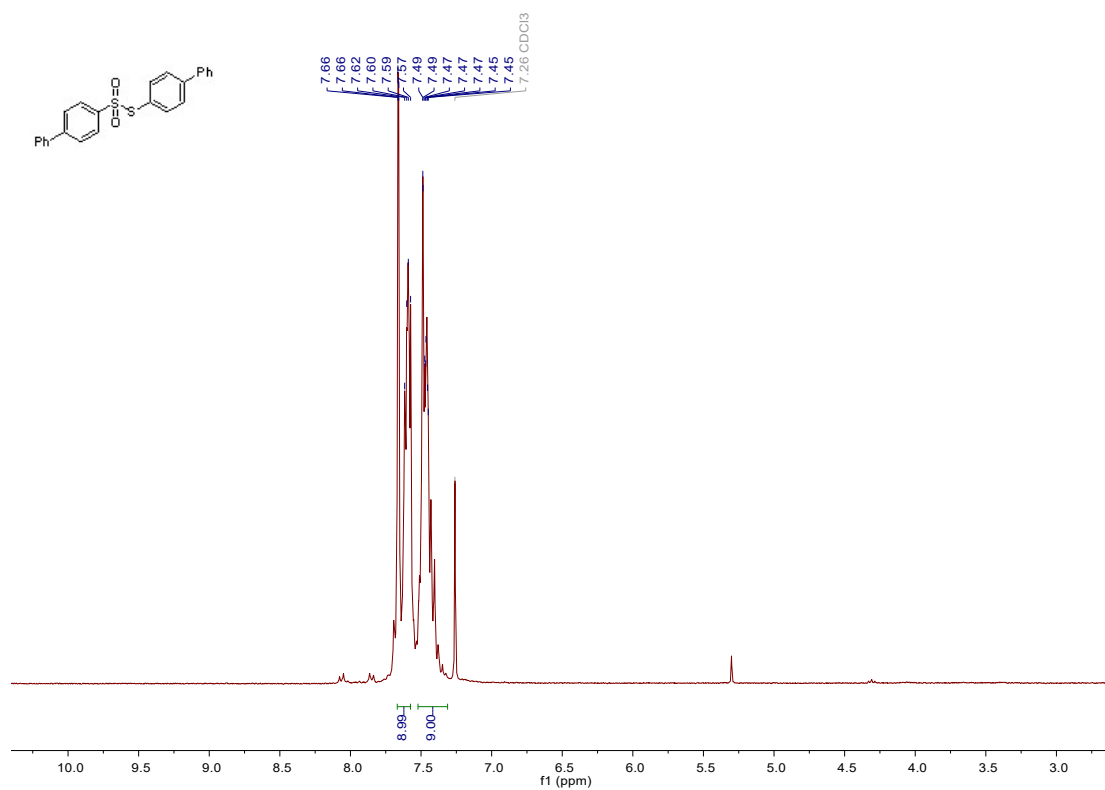

$^{13}\text{C}$  NMR of S-([1,1'-biphenyl]-4-yl)-[1,1'-biphenyl]-4-sulfonothioate (**3e**)<sup>[5]</sup>

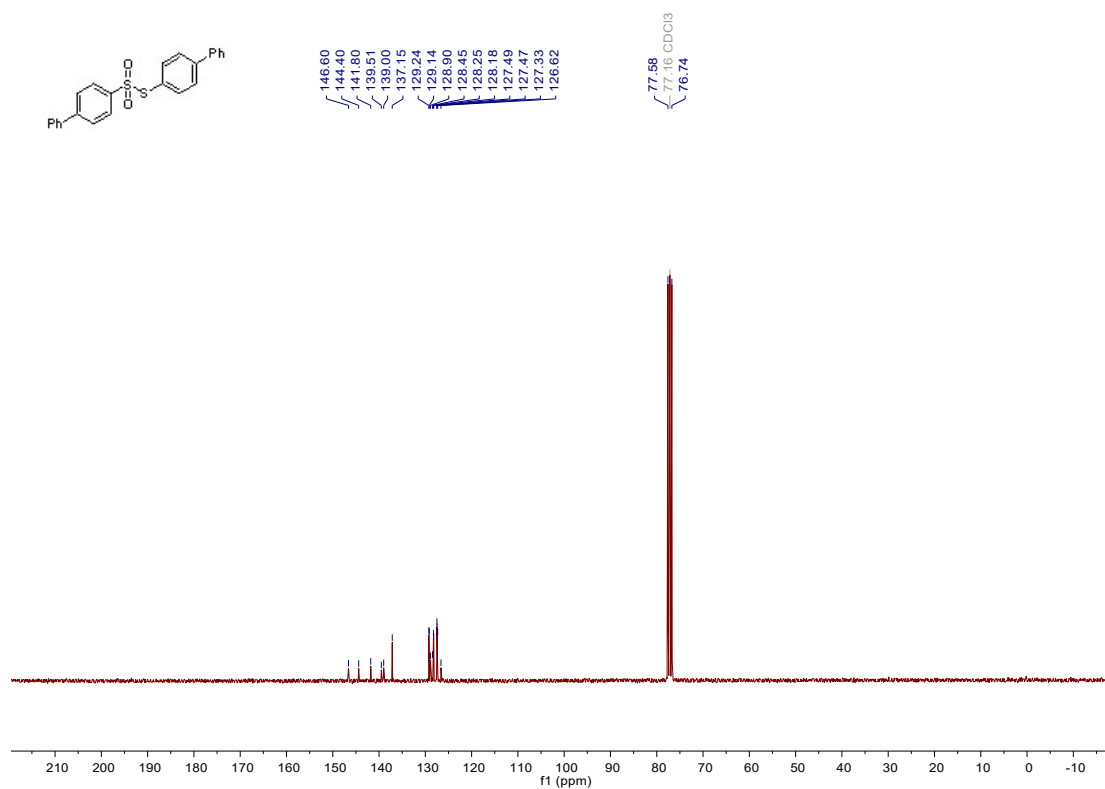

$^1\text{H}$  NMR of S-(4-fluorophenyl) 4-fluorobenzenesulfonylthioate (**3f**) [5]

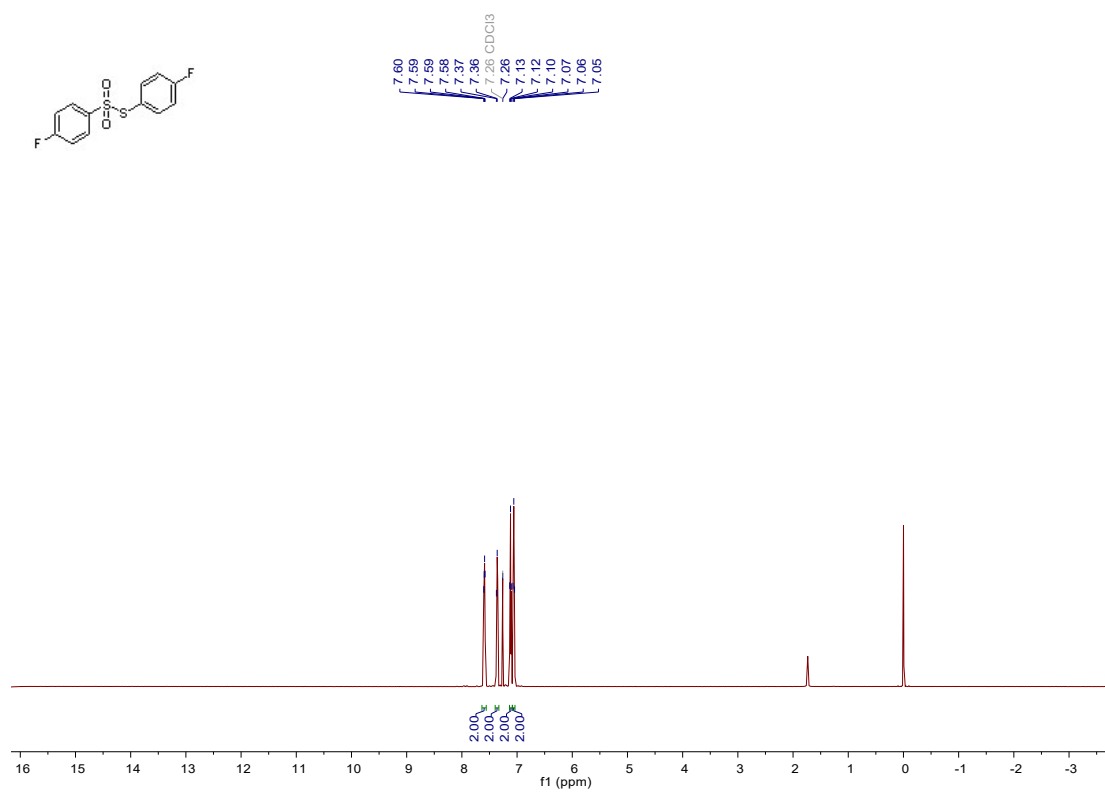

$^{13}\text{C}$  NMR of S-(4-fluorophenyl) 4-fluorobenzenesulfonylthioate (**3f**) [5]

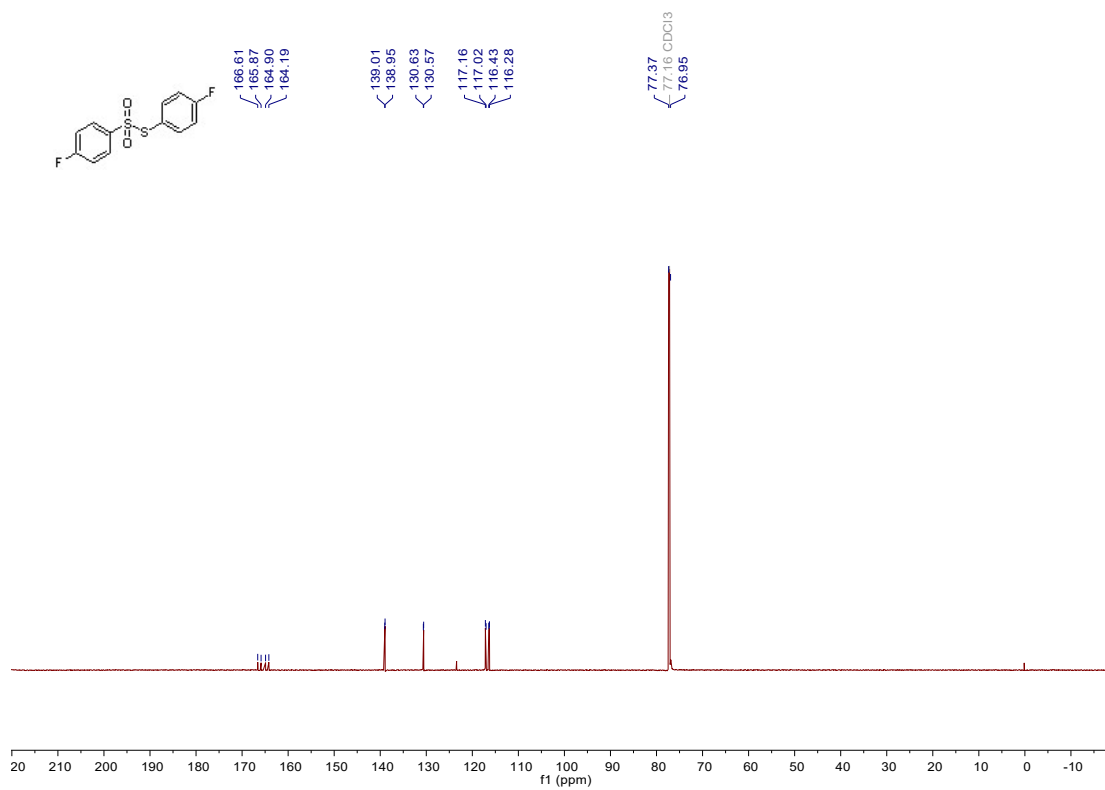



$^{19}\text{F}$  NMR Of S-(4-fluorophenyl) 4-fluorobenzenesulfonylthioate (**3f**) [5]

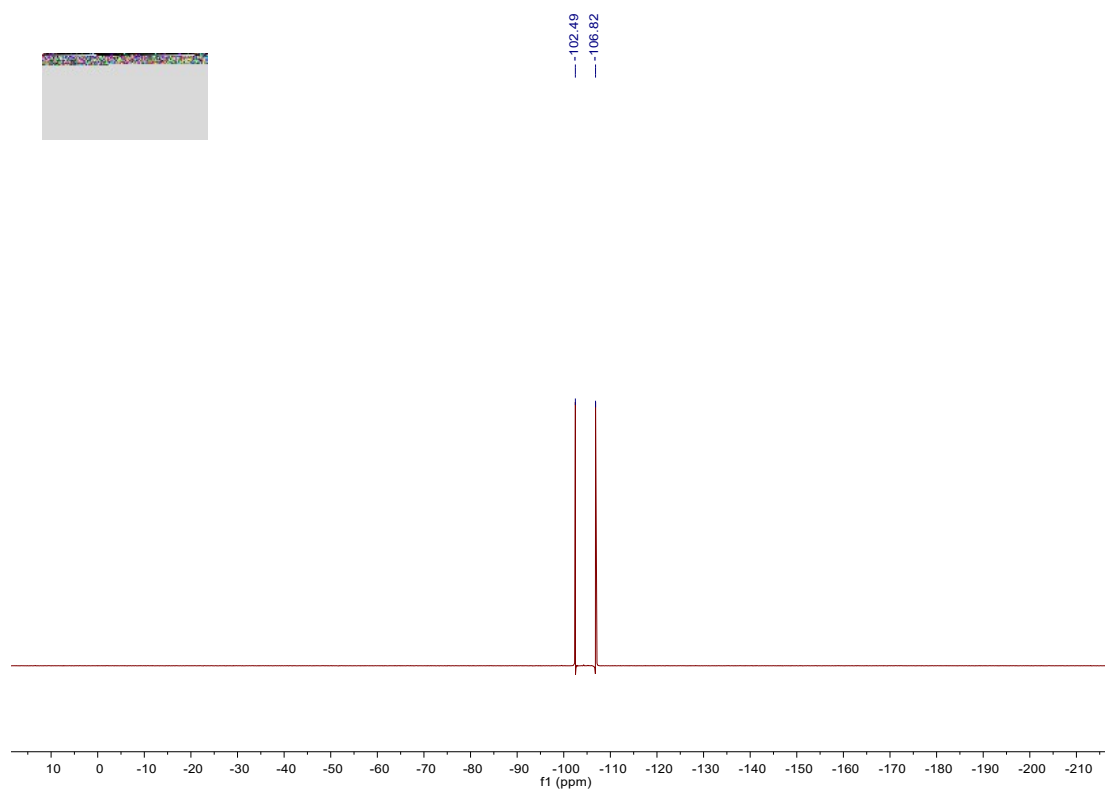

$^1\text{H}$  NMR of S-(4-chlorophenyl) 4-chlorobenzenesulfonylthioate (**3g**) [5]

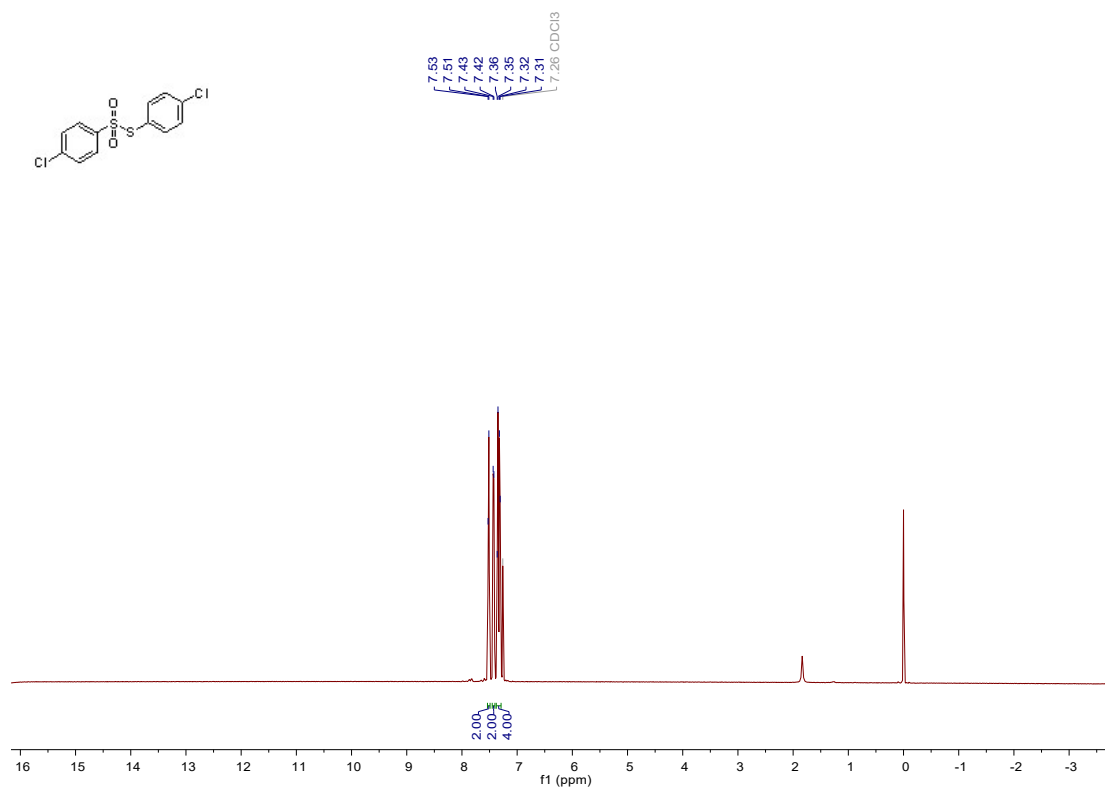

$^{13}\text{C}$  NMR of S-(4-chlorophenyl) 4-chlorobenzenesulfonylthioate (**3g**) [5]

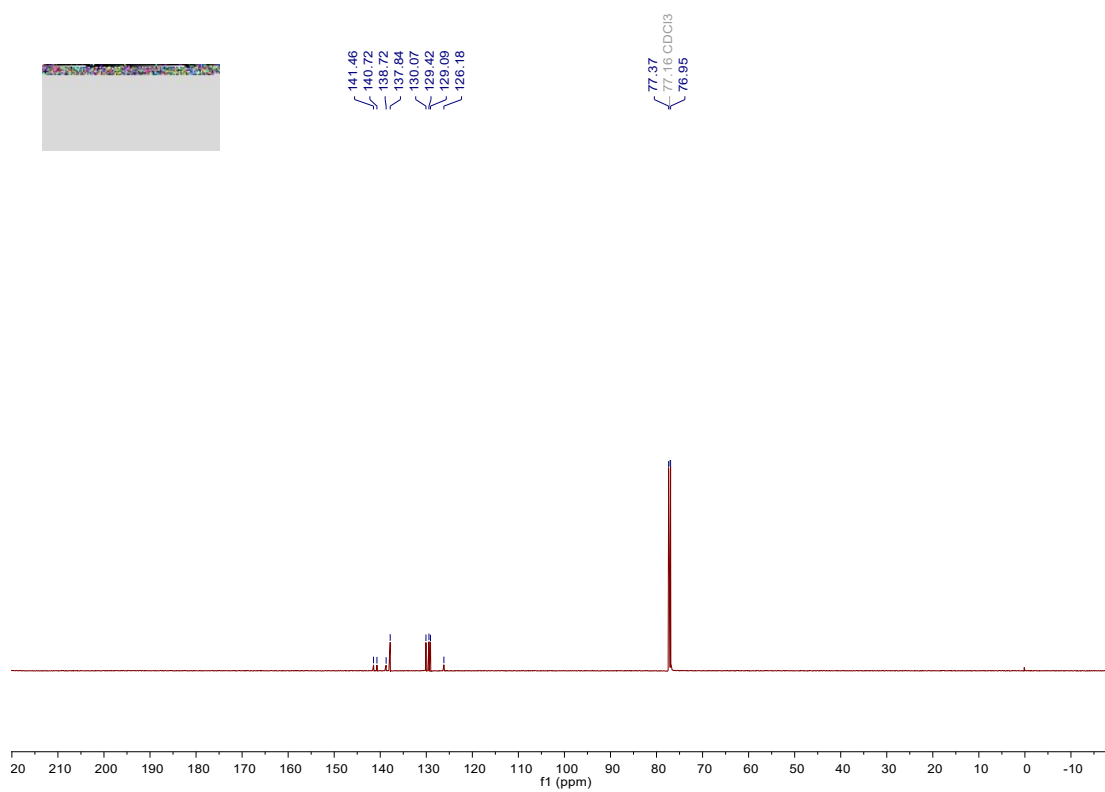

$^1\text{H}$  NMR of S-(4-bromophenyl) 4-bromobenzenesulfonylthioate (**3h**) [5]

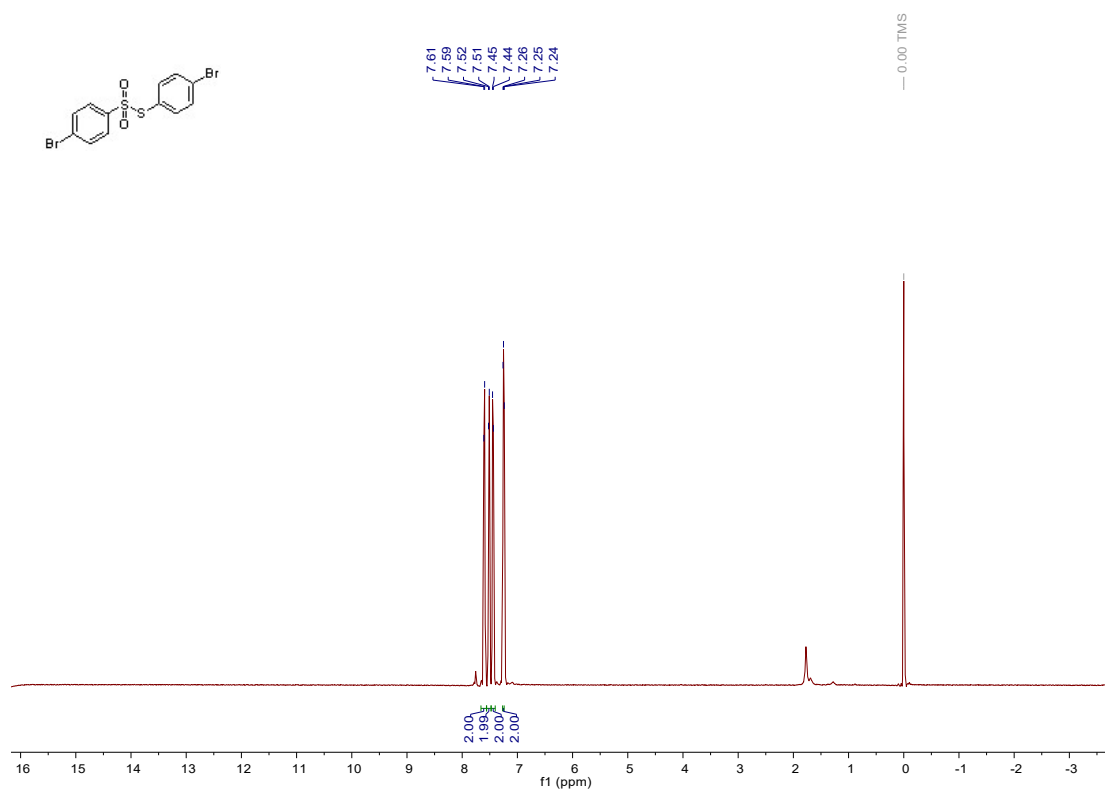

$^{13}\text{C}$  NMR of S-(4-bromophenyl) 4-bromobenzenesulfonylthioate (**3h**) [5]

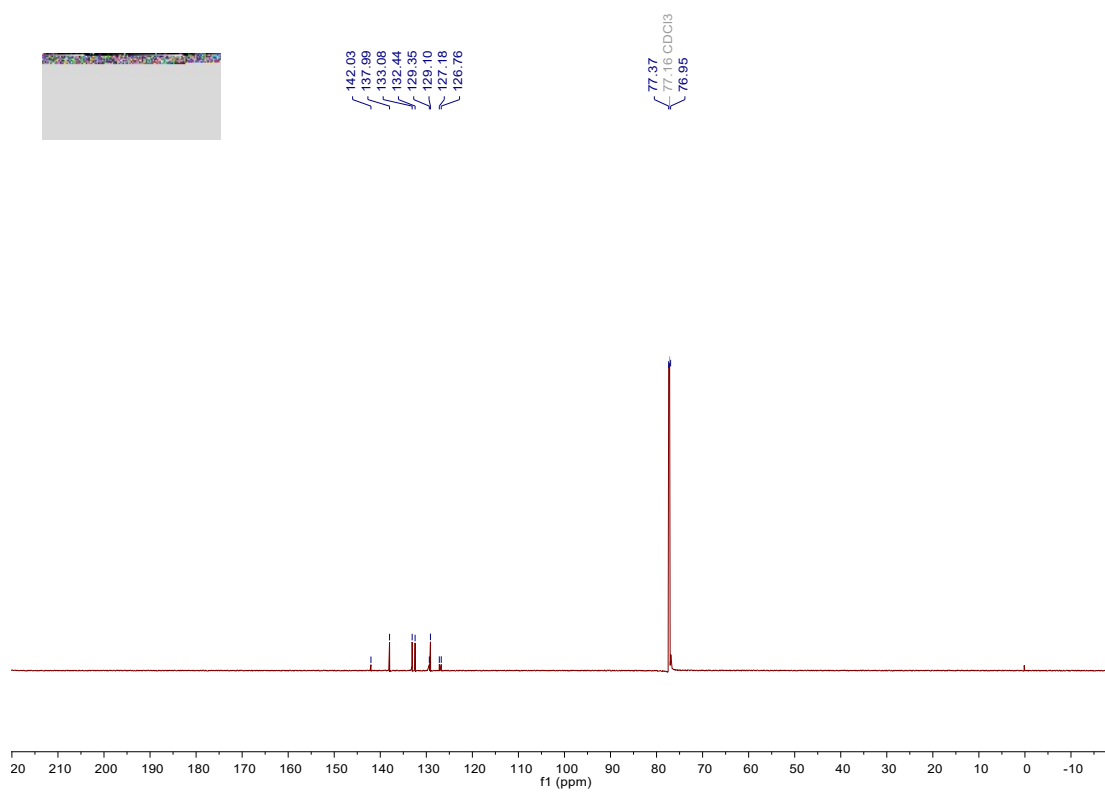

$^1\text{H}$  NMR of S-(4(trifluoromethyl)phenyl)4(trifluoromethyl)benzenesulfonylthioate (**3i**) [5]

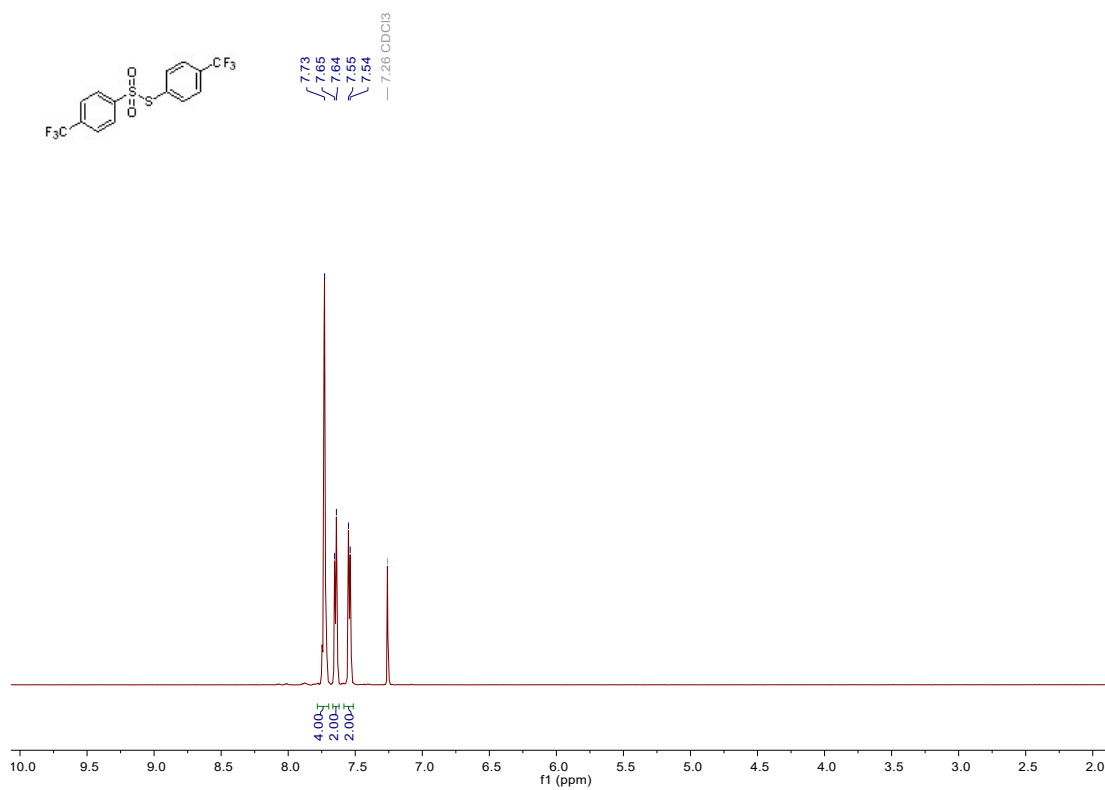

<sup>13</sup>C NMR of S-(4-(trifluoromethyl)phenyl) 4-(trifluoromethyl)benzenesulfonothioate (**3i**)  
[5]

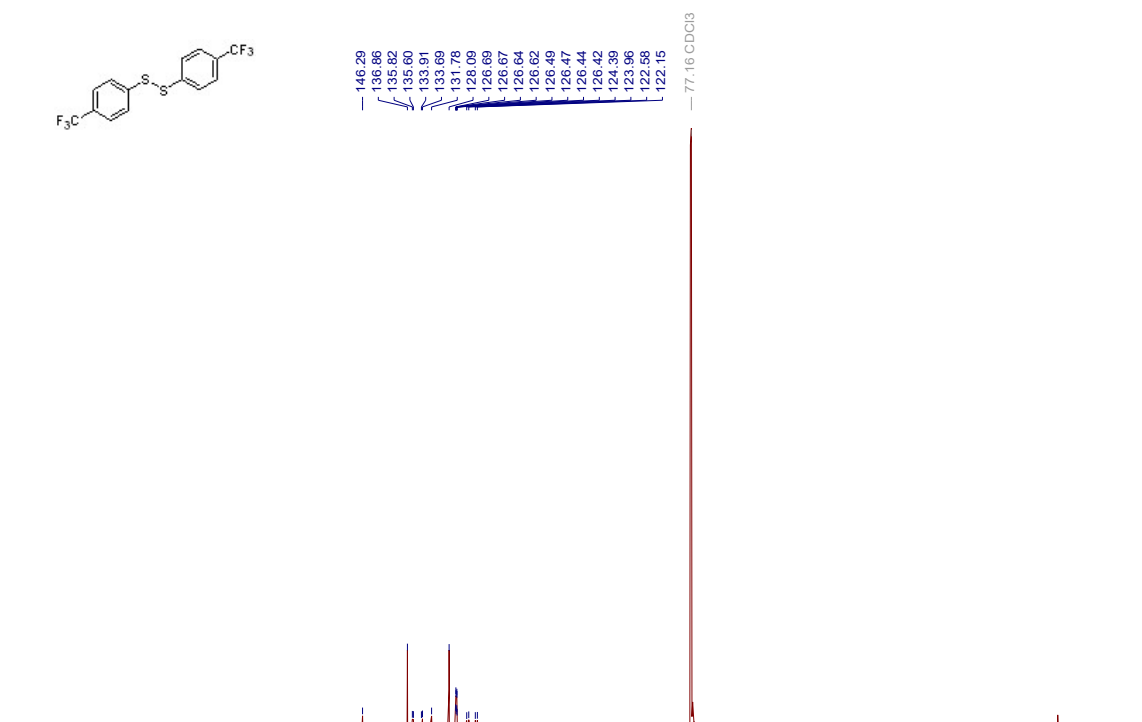

<sup>19</sup>F NMR of S-(4-(trifluoromethyl)phenyl) 4-(trifluoromethyl) benzenesulfonothioate (**3i**)  
[5]

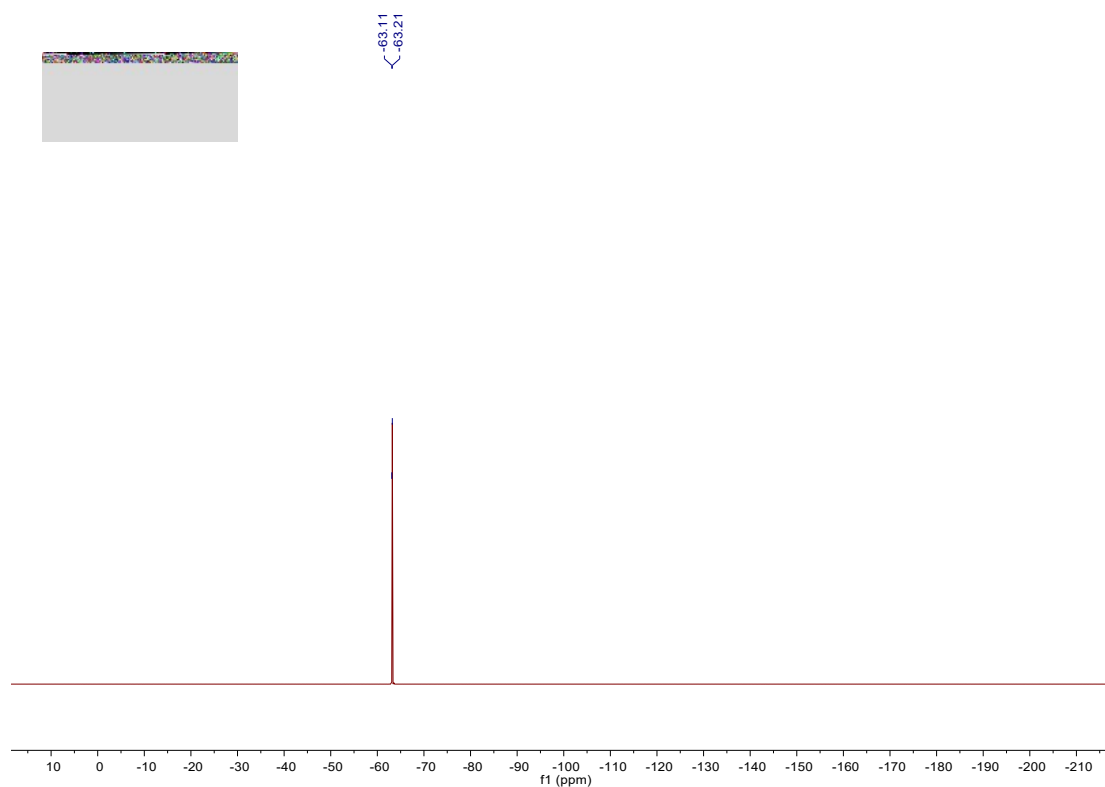

<sup>1</sup>H NMR of S-(naphthalen-2-yl) naphthalene-2-sulfonothioate (**3j**)<sup>[5]</sup>

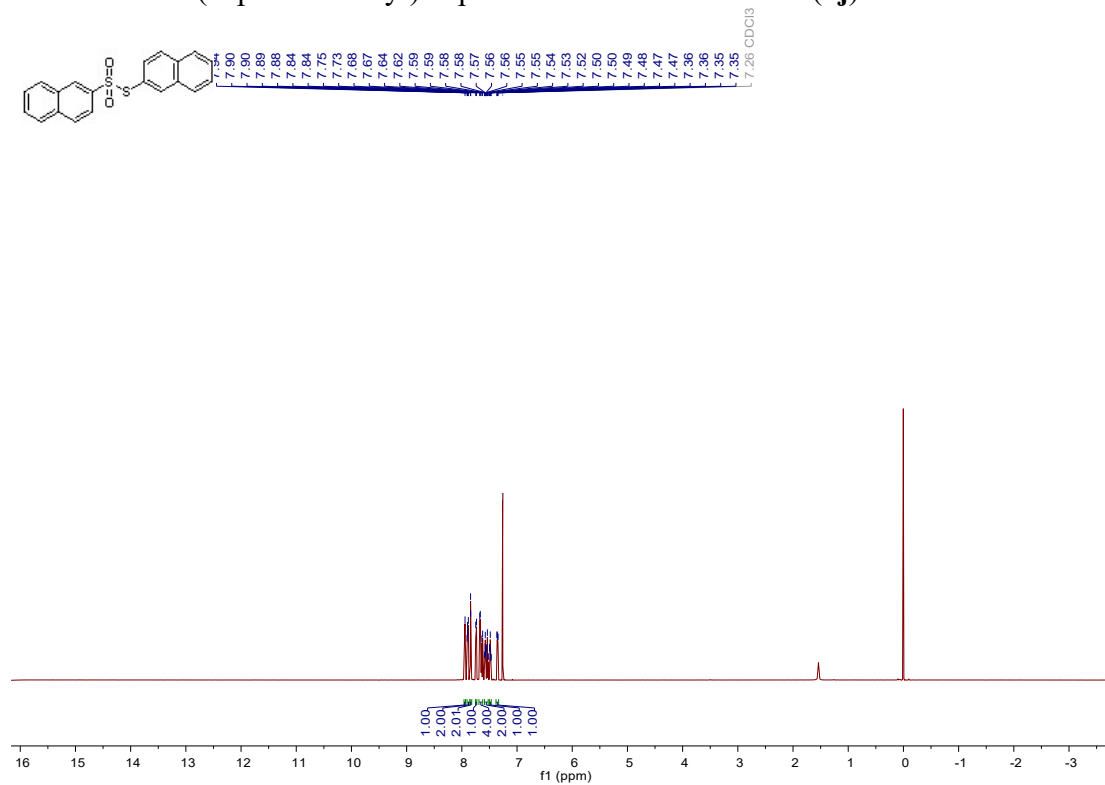

<sup>13</sup>C NMR of (naphthalen-2-yl) naphthalene-2-sulfonothioate (**3j**)<sup>[5]</sup>

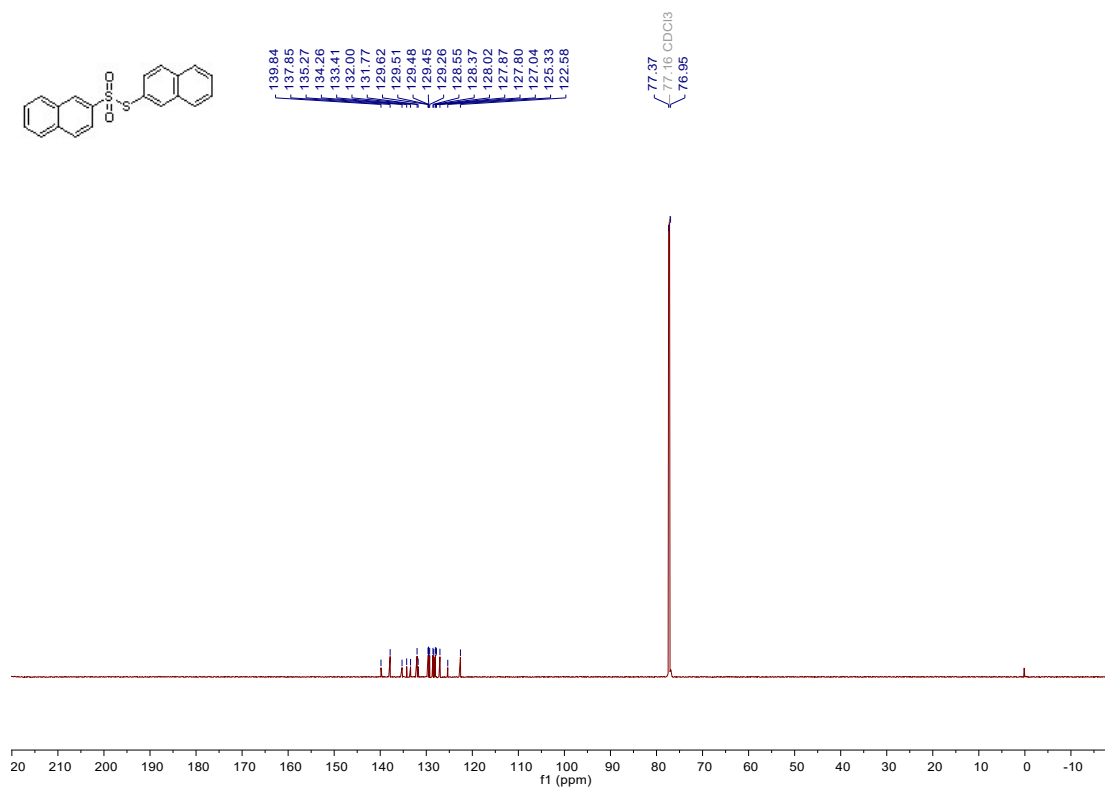

$^1\text{H}$  NMR of S-(Thiophen-2-yl)thiophene-2-sulfonylthioate (**3k**) [5]

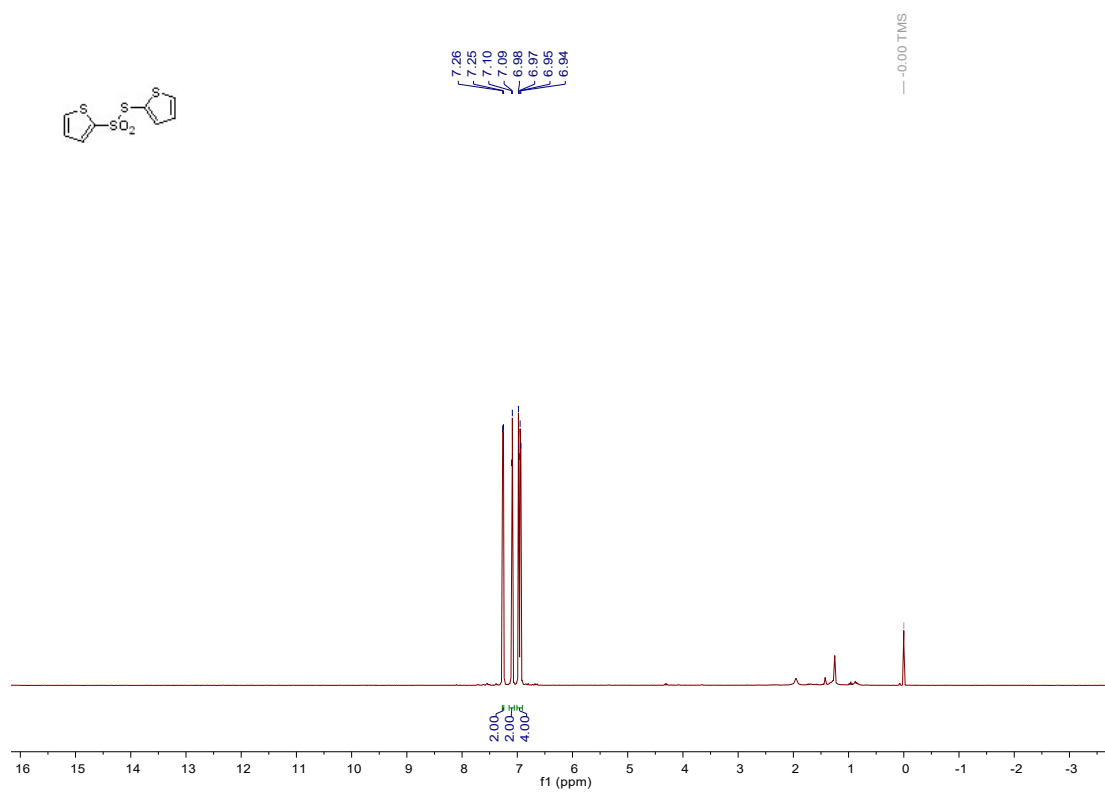

$^{13}\text{C}$  NMR of S-(Thiophen-2-yl) thiophene-2-sulfonylthioate (**3k**) [5]

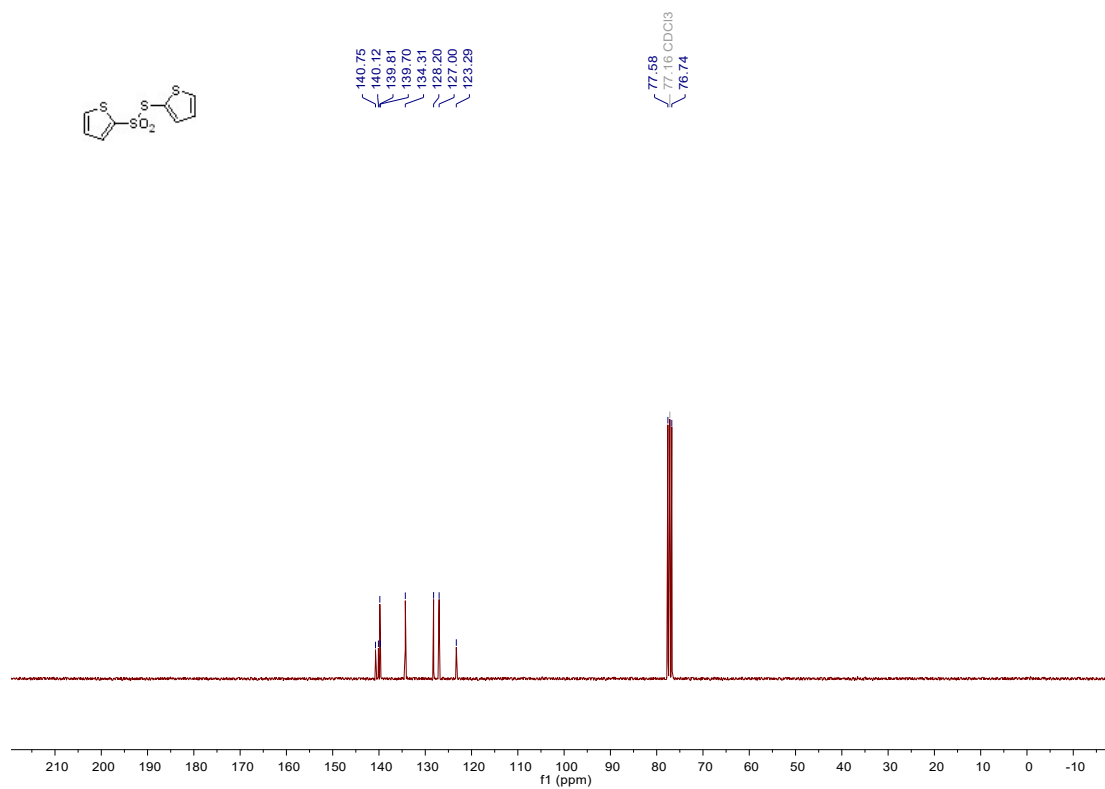



$^1\text{H}$  NMR of S-(5-Chlorothiophen-2-yl)5-chlorothiophene-2-sulfonothioatea (**31**)<sup>[5]</sup>

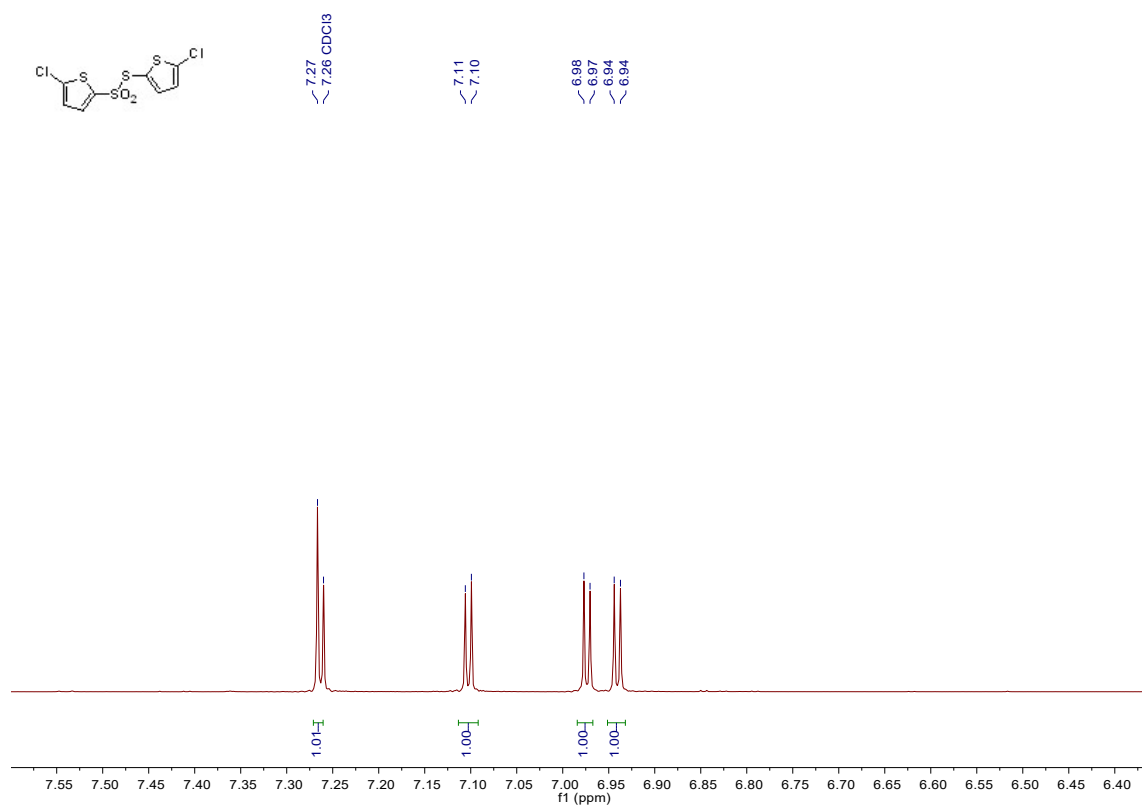

$^{13}\text{C}$  NMR of S-(5-Chlorothiophen-2-yl)5-chlorothiophene-2-sulfonothioatea (**31**)<sup>[5]</sup>

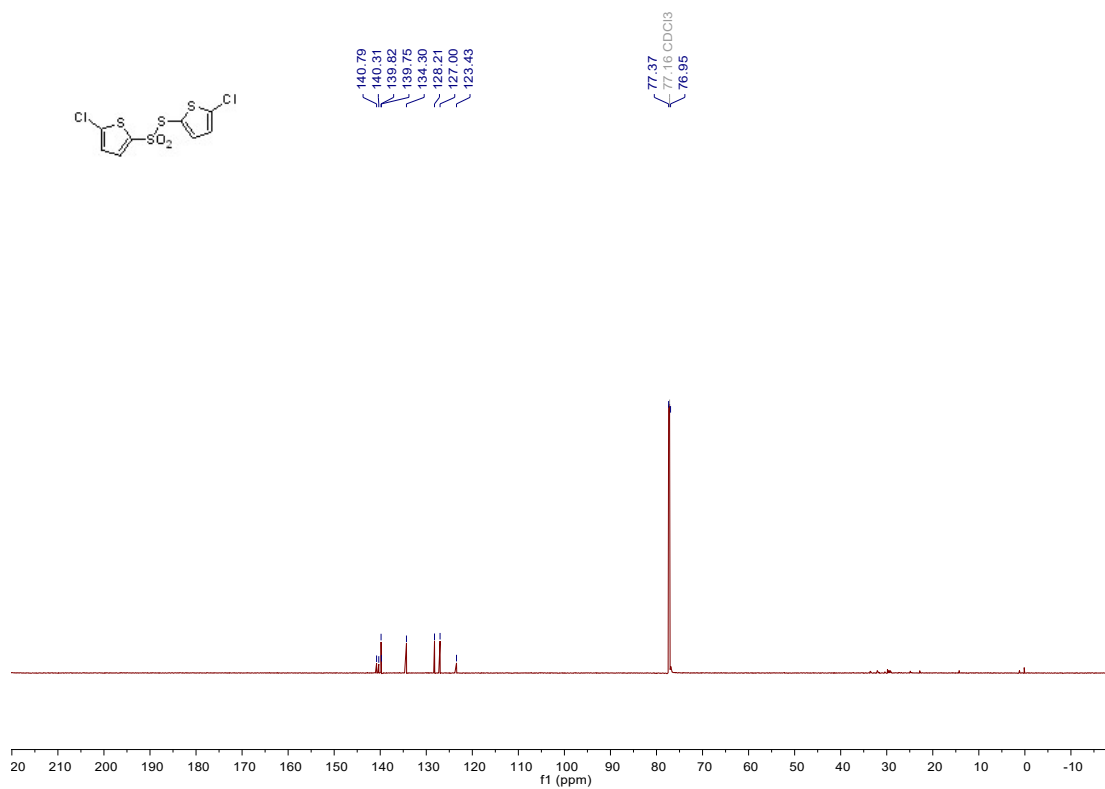



## References

- [1] P. K. Shyam, Y. K. Kim and C. Lee, *Adv. Synth. Catal.*, 2016, **358**, 56.
- [2] X. Xiao, M. Feng and X. Jiang, *Chem. Commun.*, 2015, **51**, 4208.
- [3] Y. Zheng, F.-L. Qing and Y.-G. Huang, *Adv. Synth. Catal.*, 2016, **358**, 3477.
- [4] P. Mampuys, Y. Zhu and T. Vlaar, *Angew. Chem. Int. Ed.*, 2014, **53**, 12849.
- [5] W. Wang, X. Peng and Z. Xu, *Angew. Chem. Int. Ed.* 2016, **55**, 649.
